# Supplementary material for: Genome-wide analysis of WRKY transcription factors in wheat (Triticum aestivum L.) and differential expression under water deficit condition
Source: PubMed Central journal article supplement (PMC5420200; doi:10.7717/peerj.3232), 2017-05-04
Supplement: peerj-05-3232-s004.pdf [file peerj-05-3232-s004.pdf]

**Supplemental Table S2. The WRKY transcription factor family members in plants.**

The data were downloaded from Ensembl Plants (<http://plants.ensembl.org/info/website/ftp/index.html>), PhytozomeV9 (<http://genome.jgi.doe.gov/pages/dynamicOrganismDownload.jsf?organism=PhytozomeV9>) and NCBI (<https://www.ncbi.nlm.nih.gov/protein/>).

| Lineages | Transcript ID                             | Alignment |     | Envelope |     | Hmm name | Hmm   |     | Hmm length | Bit score | E-value  | Number of WRKY Domains |
|----------|-------------------------------------------|-----------|-----|----------|-----|----------|-------|-----|------------|-----------|----------|------------------------|
|          |                                           | Start     | End | Start    | End |          | Start | End |            |           |          |                        |
| Monocots | <i>Brachypodium distachyon</i> (86 WRKYs) |           |     |          |     |          |       |     |            |           |          |                        |
|          | BRADI1G02327.1                            | 119       | 174 | 118      | 174 | WRKY     | 2     | 60  | 59         | 85.6      | 1.9E-24  | 2                      |
|          |                                           | 276       | 330 | 276      | 331 | WRKY     | 1     | 59  | 59         | 80.5      | 7.8E-23  |                        |
|          | BRADI1G07970.1                            | 191       | 247 | 191      | 247 | WRKY     | 1     | 60  | 60         | 76.5      | 1.3E-21  | 2                      |
|          |                                           | 324       | 381 | 324      | 381 | WRKY     | 1     | 60  | 60         | 83.1      | 1.2E-23  |                        |
|          | BRADI1G08106.1                            | 130       | 187 | 130      | 187 | WRKY     | 1     | 60  | 60         | 90.9      | 4.3E-26  | 1                      |
|          | BRADI1G08106.2                            | 130       | 187 | 130      | 187 | WRKY     | 1     | 60  | 60         | 90.9      | 4.3E-26  | 1                      |
|          | BRADI1G09170.1                            | 357       | 413 | 356      | 414 | WRKY     | 2     | 59  | 58         | 91.8      | 2.2E-26  | 1                      |
|          | BRADI1G13207.1                            | 42        | 97  | 42       | 98  | WRKY     | 1     | 59  | 59         | 73.5      | 1.1E-20  | 1                      |
|          | BRADI1G14300.1                            | 276       | 332 | 275      | 333 | WRKY     | 2     | 59  | 58         | 94.9      | 2.5E-27  | 1                      |
|          | BRADI1G14300.2                            | 276       | 332 | 275      | 333 | WRKY     | 2     | 59  | 58         | 94.9      | 2.5E-27  | 1                      |
|          | BRADI1G14300.3                            | 275       | 331 | 274      | 332 | WRKY     | 2     | 59  | 58         | 94.9      | 2.5E-27  | 1                      |
|          | BRADI1G16120.1                            | 206       | 262 | 206      | 262 | WRKY     | 1     | 60  | 60         | 82.8      | 1.5E-23  | 2                      |
|          |                                           | 375       | 432 | 375      | 432 | WRKY     | 1     | 60  | 60         | 83.7      | 7.4E-24  |                        |
|          | BRADI1G17660.1                            | 128       | 188 | 128      | 188 | WRKY     | 1     | 60  | 62         | 82.1      | 2.3E-23  | 1                      |
|          | BRADI1G22680.1                            | 177       | 231 | 177      | 232 | WRKY     | 1     | 59  | 59         | 80.4      | 8.3E-23  | 2                      |
|          |                                           | 342       | 398 | 342      | 399 | WRKY     | 1     | 59  | 59         | 84.4      | 4.8E-24  |                        |
|          | BRADI1G23340.1                            | 227       | 283 | 227      | 283 | WRKY     | 1     | 60  | 60         | 86.3      | 1.2E-24  | 2                      |
|          |                                           | 401       | 458 | 401      | 458 | WRKY     | 1     | 60  | 60         | 91.9      | 2.1E-26  |                        |
|          | BRADI1G23340.2                            | 151       | 207 | 151      | 207 | WRKY     | 1     | 60  | 60         | 86.5      | 9.9E-25  | 2                      |
|          |                                           | 325       | 382 | 325      | 382 | WRKY     | 1     | 60  | 60         | 92.2      | 1.7E-26  |                        |
|          | BRADI1G30870.1                            | 186       | 243 | 186      | 244 | WRKY     | 1     | 59  | 59         | 86        | 1.5E-24  | 1                      |
|          | BRADI1G47690.1                            | 119       | 174 | 118      | 174 | WRKY     | 2     | 60  | 59         | 85.9      | 1.5E-24  | 2                      |
|          |                                           | 273       | 293 | 273      | 294 | WRKY     | 1     | 21  | 21         | 23.4      | 0.000053 |                        |
|          | BRADI1G48770.1                            | 113       | 173 | 113      | 173 | WRKY     | 1     | 60  | 62         | 90.8      | 4.5E-26  | 1                      |
|          | BRADI1G51030.1                            | 268       | 343 | 268      | 343 | WRKY     | 1     | 60  | 77         | 78.9      | 2.3E-22  | 1                      |
|          | BRADI1G59180.1                            | 123       | 180 | 123      | 180 | WRKY     | 1     | 60  | 60         | 90.7      | 4.9E-26  | 1                      |
|          | BRADI1G63220.1                            | 114       | 172 | 113      | 173 | WRKY     | 2     | 59  | 60         | 86.9      | 7.5E-25  | 1                      |
|          | BRADI1G63910.1                            | 33        | 93  | 33       | 94  | WRKY     | 1     | 59  | 61         | 84.7      | 3.7E-24  | 1                      |
|          | BRADI1G63910.2                            | 11        | 71  | 11       | 72  | WRKY     | 1     | 59  | 61         | 85        | 3E-24    | 1                      |
|          | BRADI2G00280.1                            | 141       | 198 | 141      | 198 | WRKY     | 1     | 60  | 60         | 84.9      | 3.2E-24  | 2                      |
|          |                                           | 281       | 338 | 281      | 338 | WRKY     | 1     | 60  | 60         | 88.5      | 2.4E-25  |                        |
|          | BRADI2G05234.1                            | 150       | 206 | 150      | 207 | WRKY     | 1     | 59  | 59         | 85.6      | 1.9E-24  | 1                      |
|          | BRADI2G05500.1                            | 262       | 320 | 262      | 320 | WRKY     | 1     | 60  | 60         | 91.3      | 3.1E-26  | 1                      |
|          | BRADI2G05510.1                            | 149       | 206 | 149      | 206 | WRKY     | 1     | 60  | 60         | 80.4      | 8.4E-23  | 1                      |
|          | BRADI2G08620.1                            | 363       | 420 | 362      | 420 | WRKY     | 2     | 60  | 59         | 93.2      | 8.4E-27  | 1                      |
|          | BRADI2G11170.1                            | 231       | 288 | 230      | 288 | WRKY     | 2     | 60  | 59         | 91.7      | 2.4E-26  | 1                      |
|          | BRADI2G15360.1                            | 161       | 218 | 161      | 218 | WRKY     | 1     | 60  | 60         | 90.8      | 4.7E-26  | 1                      |
|          | BRADI2G15405.1                            | 167       | 224 | 167      | 225 | WRKY     | 1     | 59  | 59         | 78.5      | 3.2E-22  | 1                      |
|          | BRADI2G15877.1                            | 98        | 157 | 98       | 158 | WRKY     | 1     | 59  | 61         | 89.1      | 1.6E-25  | 1                      |
|          | BRADI2G16150.1                            | 326       | 383 | 325      | 383 | WRKY     | 2     | 60  | 59         | 93        | 9.6E-27  | 1                      |

|                |     |     |     |     |      |    |    |    |      |         |   |
|----------------|-----|-----|-----|-----|------|----|----|----|------|---------|---|
| BRADI2G16357.1 | 208 | 265 | 208 | 265 | WRKY | 1  | 60 | 60 | 92   | 2E-26   | 1 |
| BRADI2G18530.1 | 157 | 213 | 157 | 214 | WRKY | 1  | 59 | 59 | 86   | 1.4E-24 | 1 |
| BRADI2G19070.1 | 160 | 217 | 160 | 217 | WRKY | 1  | 60 | 60 | 90.5 | 5.9E-26 | 1 |
| BRADI2G22230.1 | 138 | 199 | 138 | 199 | WRKY | 1  | 60 | 62 | 76.5 | 1.3E-21 | 1 |
| BRADI2G22440.1 | 184 | 240 | 184 | 240 | WRKY | 1  | 60 | 60 | 86.9 | 7.5E-25 | 2 |
|                | 347 | 404 | 347 | 404 | WRKY | 1  | 60 | 60 | 90.1 | 7.8E-26 |   |
| BRADI2G30695.1 | 108 | 171 | 108 | 171 | WRKY | 1  | 60 | 64 | 74.2 | 6.9E-21 | 1 |
| BRADI2G30800.1 | 158 | 217 | 158 | 218 | WRKY | 1  | 59 | 61 | 85.6 | 2E-24   | 1 |
| BRADI2G33540.1 | 95  | 151 | 95  | 152 | WRKY | 1  | 59 | 59 | 83.6 | 8.2E-24 | 1 |
| BRADI2G44035.1 | 181 | 238 | 180 | 238 | WRKY | 2  | 60 | 59 | 78.9 | 2.4E-22 | 1 |
| BRADI2G44090.1 | 196 | 253 | 196 | 253 | WRKY | 1  | 60 | 60 | 88.8 | 2E-25   | 1 |
| BRADI2G44270.1 | 101 | 161 | 101 | 161 | WRKY | 1  | 60 | 62 | 79.4 | 1.7E-22 | 1 |
| BRADI2G45480.1 | 136 | 195 | 136 | 196 | WRKY | 1  | 59 | 61 | 83.7 | 7.6E-24 | 1 |
| BRADI2G45900.1 | 184 | 241 | 184 | 241 | WRKY | 1  | 60 | 60 | 89.9 | 9.1E-26 | 1 |
| BRADI2G48090.1 | 132 | 188 | 132 | 189 | WRKY | 1  | 59 | 59 | 82.3 | 2.1E-23 | 2 |
|                | 65  | 121 | 64  | 122 | WRKY | 2  | 59 | 58 | 90.8 | 4.5E-26 |   |
| BRADI2G48907.1 | 65  | 121 | 64  | 122 | WRKY | 2  | 59 | 58 | 90.8 | 4.5E-26 | 1 |
| BRADI2G49020.1 | 144 | 201 | 144 | 201 | WRKY | 1  | 60 | 60 | 90.6 | 5.5E-26 | 1 |
| BRADI2G49906.1 | 86  | 143 | 85  | 143 | WRKY | 2  | 60 | 59 | 90.3 | 6.8E-26 | 1 |
| BRADI2G53480.1 | 52  | 72  | 51  | 73  | WRKY | 2  | 22 | 21 | 30.9 | 2.4E-07 | 1 |
| BRADI2G53495.1 | 68  | 127 | 67  | 128 | WRKY | 2  | 59 | 60 | 78.8 | 2.6E-22 | 1 |
| BRADI2G53500.1 | 124 | 187 | 124 | 187 | WRKY | 1  | 60 | 64 | 74.5 | 5.5E-21 | 1 |
| BRADI2G53510.1 | 42  | 106 | 41  | 106 | WRKY | 2  | 60 | 65 | 75.5 | 2.7E-21 | 1 |
| BRADI2G53520.1 | 111 | 169 | 111 | 170 | WRKY | 1  | 59 | 60 | 81.5 | 3.8E-23 | 1 |
| BRADI2G53760.1 | 229 | 284 | 229 | 285 | WRKY | 1  | 59 | 59 | 84.7 | 3.6E-24 | 2 |
|                | 398 | 455 | 398 | 455 | WRKY | 1  | 60 | 60 | 89   | 1.7E-25 |   |
| BRADI2G54720.1 | 111 | 147 | 104 | 148 | WRKY | 21 | 59 | 39 | 41.7 | 9.6E-11 | 1 |
| BRADI2G62130.1 | 141 | 162 | 141 | 163 | WRKY | 1  | 22 | 22 | 30.9 | 2.4E-07 | 1 |
| BRADI3G06070.1 | 186 | 243 | 186 | 244 | WRKY | 1  | 59 | 59 | 86.1 | 1.3E-24 | 1 |
| BRADI3G09810.1 | 169 | 225 | 168 | 226 | WRKY | 2  | 59 | 58 | 87.1 | 6.6E-25 | 1 |
| BRADI3G18580.1 | 240 | 296 | 239 | 297 | WRKY | 2  | 59 | 58 | 90.3 | 6.5E-26 | 1 |
| BRADI3G19640.1 | 259 | 313 | 258 | 314 | WRKY | 2  | 59 | 58 | 76.5 | 1.4E-21 | 2 |
|                | 430 | 486 | 429 | 486 | WRKY | 2  | 60 | 59 | 89.4 | 1.3E-25 |   |
| BRADI3G34567.1 | 183 | 240 | 182 | 240 | WRKY | 2  | 60 | 59 | 90.4 | 6.4E-26 | 1 |
| BRADI3G34850.1 | 119 | 179 | 119 | 179 | WRKY | 1  | 60 | 62 | 93.2 | 8.2E-27 | 1 |
| BRADI3G39340.1 | 256 | 312 | 256 | 312 | WRKY | 1  | 60 | 60 | 87.5 | 4.9E-25 | 2 |
|                | 373 | 429 | 373 | 430 | WRKY | 1  | 59 | 59 | 91.2 | 3.6E-26 |   |
| BRADI3G50360.1 | 156 | 212 | 156 | 213 | WRKY | 1  | 59 | 59 | 85.8 | 1.7E-24 | 1 |
| BRADI3G52420.1 | 227 | 284 | 226 | 284 | WRKY | 2  | 60 | 59 | 89.2 | 1.4E-25 | 1 |
| BRADI3G57710.1 | 331 | 389 | 331 | 389 | WRKY | 1  | 60 | 60 | 94.9 | 2.5E-27 | 1 |
| BRADI4G01950.1 | 160 | 217 | 160 | 217 | WRKY | 1  | 60 | 60 | 86.3 | 1.2E-24 | 2 |
|                | 316 | 373 | 316 | 373 | WRKY | 1  | 60 | 60 | 91   | 4E-26   |   |
| BRADI4G02680.1 | 287 | 343 | 286 | 344 | WRKY | 2  | 59 | 58 | 92   | 1.9E-26 | 1 |
| BRADI4G06690.1 | 230 | 286 | 230 | 286 | WRKY | 1  | 60 | 60 | 85.1 | 2.8E-24 | 1 |
| BRADI4G09890.1 | 837 | 893 | 837 | 893 | WRKY | 1  | 60 | 60 | 76.4 | 1.5E-21 | 1 |
| BRADI4G19060.1 | 117 | 174 | 117 | 174 | WRKY | 1  | 60 | 61 | 94.5 | 3.2E-27 | 1 |
| BRADI4G25717.1 | 51  | 111 | 51  | 112 | WRKY | 1  | 59 | 61 | 87.3 | 5.7E-25 | 1 |
| BRADI4G30360.1 | 180 | 238 | 180 | 238 | WRKY | 1  | 60 | 60 | 84.2 | 5.4E-24 | 1 |
| BRADI4G30370.1 | 102 | 142 | 102 | 153 | WRKY | 1  | 41 | 41 | 56.3 | 2.8E-15 | 1 |

|                                             |     |     |     |     |      |    |    |    |      |          |   |
|---------------------------------------------|-----|-----|-----|-----|------|----|----|----|------|----------|---|
| BRADI4G33370.1                              | 286 | 342 | 286 | 342 | WRKY | 1  | 60 | 60 | 80.1 | 1E-22    | 2 |
|                                             | 505 | 562 | 505 | 562 | WRKY | 1  | 60 | 60 | 88.3 | 2.8E-25  |   |
| BRADI4G44342.1                              | 123 | 192 | 122 | 192 | WRKY | 2  | 60 | 70 | 77.4 | 7E-22    | 1 |
| BRADI4G44350.1                              | 131 | 197 | 130 | 198 | WRKY | 2  | 59 | 67 | 77.5 | 6.5E-22  | 1 |
| BRADI4G44360.1                              | 122 | 188 | 121 | 189 | WRKY | 2  | 59 | 67 | 79.8 | 1.2E-22  | 1 |
| BRADI4G44370.1                              | 111 | 179 | 110 | 179 | WRKY | 2  | 60 | 69 | 85.3 | 2.5E-24  | 1 |
| BRADI4G45290.1                              | 118 | 173 | 117 | 173 | WRKY | 2  | 60 | 59 | 85.7 | 1.9E-24  | 2 |
|                                             | 275 | 329 | 275 | 330 | WRKY | 1  | 59 | 59 | 80.5 | 7.8E-23  |   |
| BRADI5G04817.1                              | 237 | 293 | 236 | 294 | WRKY | 2  | 59 | 58 | 88.6 | 2.3E-25  | 1 |
| BRADI5G13090.1                              | 289 | 345 | 289 | 345 | WRKY | 1  | 60 | 60 | 82.6 | 1.7E-23  | 2 |
|                                             | 523 | 580 | 523 | 580 | WRKY | 1  | 60 | 60 | 88.2 | 3E-25    |   |
| BRADI5G17395.1                              | 118 | 174 | 118 | 175 | WRKY | 1  | 59 | 59 | 88.2 | 2.9E-25  | 1 |
| BRADI5G20290.1                              | 140 | 197 | 139 | 197 | WRKY | 2  | 60 | 59 | 90.5 | 5.9E-26  | 1 |
| BRADI5G20700.1                              | 224 | 280 | 223 | 281 | WRKY | 2  | 59 | 58 | 91.8 | 2.3E-26  | 1 |
| <b><i>Triticum aestivum</i> (171 WRKYs)</b> |     |     |     |     |      |    |    |    |      |          |   |
| Traes_1AL_0404BC790.1                       | 57  | 114 | 57  | 114 | WRKY | 1  | 60 | 60 | 93.1 | 9.00E-27 | 1 |
| Traes_1AL_180B9CF01.1                       | 63  | 120 | 63  | 120 | WRKY | 1  | 60 | 60 | 89.7 | 1.00E-25 | 1 |
| Traes_1AL_309623B48.1                       | 136 | 197 | 136 | 197 | WRKY | 1  | 60 | 62 | 73.5 | 1.20E-20 | 1 |
| Traes_1AL_4E924201A.1                       | 184 | 241 | 183 | 241 | WRKY | 2  | 60 | 59 | 90.4 | 6.10E-26 | 1 |
| Traes_1AL_9ADA7A031.1                       | 133 | 189 | 133 | 190 | WRKY | 1  | 59 | 59 | 85.5 | 2.00E-24 | 1 |
| Traes_1AL_B24F28600.1                       | 135 | 195 | 135 | 196 | WRKY | 1  | 59 | 61 | 77.2 | 8.00E-22 | 1 |
| Traes_1AL_F64E07A92.1                       | 27  | 84  | 27  | 84  | WRKY | 1  | 60 | 60 | 91.1 | 3.60E-26 | 1 |
| Traes_1AS_1432A2F79.1                       | 36  | 92  | 36  | 93  | WRKY | 1  | 59 | 59 | 85.9 | 1.50E-24 | 1 |
| Traes_1AS_F3EAEC435.1                       | 179 | 236 | 179 | 236 | WRKY | 1  | 60 | 60 | 86.2 | 1.30E-24 | 2 |
|                                             | 324 | 381 | 324 | 381 | WRKY | 1  | 60 | 60 | 88.6 | 2.30E-25 |   |
| Traes_1BL_1D865A8CC.1                       | 9   | 46  | 6   | 46  | WRKY | 21 | 60 | 40 | 48.7 | 6.40E-13 | 1 |
| Traes_1BL_46340D685.1                       | 134 | 195 | 134 | 195 | WRKY | 1  | 60 | 62 | 73.5 | 1.20E-20 | 1 |
| Traes_1BL_73811B853.1                       | 14  | 73  | 14  | 74  | WRKY | 1  | 59 | 61 | 89.5 | 1.20E-25 | 1 |
| Traes_1BL_794E99FF5.1                       | 183 | 240 | 182 | 240 | WRKY | 2  | 60 | 59 | 90.4 | 6.10E-26 | 1 |
| Traes_1BL_9AFA4B870.1                       | 108 | 167 | 108 | 167 | WRKY | 1  | 60 | 62 | 82.9 | 1.30E-23 | 1 |
| Traes_1BL_B15990028.1                       | 39  | 96  | 39  | 96  | WRKY | 1  | 60 | 60 | 89.6 | 1.10E-25 | 1 |
| Traes_1BL_B4AFDB663.1                       | 134 | 194 | 134 | 195 | WRKY | 1  | 59 | 61 | 79   | 2.30E-22 | 1 |
| Traes_1BS_EF67E5A24.1                       | 186 | 243 | 186 | 243 | WRKY | 1  | 60 | 60 | 86.1 | 1.40E-24 | 2 |
|                                             | 334 | 391 | 334 | 391 | WRKY | 1  | 60 | 60 | 88.1 | 3.30E-25 |   |
| Traes_1DL_46428511F.1                       | 43  | 100 | 43  | 100 | WRKY | 1  | 60 | 60 | 89.5 | 1.20E-25 | 1 |
| Traes_1DL_5BAB0B6BC.1                       | 57  | 114 | 57  | 114 | WRKY | 1  | 60 | 60 | 93.1 | 9.00E-27 | 1 |
| Traes_1DL_D1EC7DEA6.1                       | 66  | 111 | 66  | 112 | WRKY | 1  | 48 | 48 | 71.4 | 5.40E-20 | 1 |
| Traes_1DL_D550418641.2                      | 11  | 67  | 11  | 68  | WRKY | 1  | 59 | 59 | 87.9 | 3.60E-25 | 1 |
| Traes_1DL_DFE1721E0.1                       | 141 | 202 | 141 | 202 | WRKY | 1  | 60 | 62 | 72.9 | 1.80E-20 | 1 |
| Traes_1DS_A6733B734.1                       | 184 | 241 | 184 | 241 | WRKY | 1  | 60 | 60 | 86   | 1.40E-24 | 2 |
|                                             | 338 | 395 | 338 | 395 | WRKY | 1  | 60 | 60 | 88.5 | 2.50E-25 |   |
| Traes_2AL_15A7BB684.1                       | 236 | 292 | 235 | 293 | WRKY | 2  | 59 | 58 | 91.2 | 3.60E-26 | 1 |
| Traes_2AL_1B43EA59E.1                       | 69  | 126 | 69  | 126 | WRKY | 1  | 60 | 60 | 91.5 | 2.90E-26 | 1 |
| Traes_2AL_409AB7647.1                       | 294 | 350 | 294 | 350 | WRKY | 1  | 60 | 60 | 82.6 | 1.70E-23 | 2 |
|                                             | 523 | 580 | 523 | 580 | WRKY | 1  | 60 | 60 | 88.2 | 3.00E-25 |   |
| Traes_2AL_434E9F101.1                       | 243 | 299 | 242 | 300 | WRKY | 2  | 59 | 58 | 91   | 4.10E-26 | 1 |
| Traes_2AL_B1270662B.1                       | 152 | 208 | 152 | 209 | WRKY | 1  | 59 | 59 | 87.8 | 3.90E-25 | 1 |
| Traes_2AS_0186B9E4F.2                       | 152 | 206 | 152 | 207 | WRKY | 1  | 59 | 59 | 75.6 | 2.60E-21 | 2 |
|                                             | 316 | 373 | 316 | 373 | WRKY | 1  | 60 | 60 | 87.4 | 5.30E-25 |   |

|                         |     |     |     |     |      |    |    |    |      |          |   |
|-------------------------|-----|-----|-----|-----|------|----|----|----|------|----------|---|
| Traes_2AS_1AFFE8DA6.1   | 23  | 44  | 22  | 44  | WRKY | 2  | 23 | 22 | 32.9 | 5.40E-08 | 1 |
| Traes_2AS_6269D889E.1   | 120 | 180 | 120 | 180 | WRKY | 1  | 60 | 62 | 94.1 | 4.30E-27 | 1 |
| Traes_2AS_C407071E4.2   | 188 | 244 | 188 | 244 | WRKY | 1  | 60 | 60 | 84.5 | 4.20E-24 | 2 |
|                         | 362 | 419 | 362 | 419 | WRKY | 1  | 60 | 60 | 92   | 1.90E-26 |   |
| Traes_2AS_D0C21ADB5.1   | 91  | 118 | 91  | 126 | WRKY | 1  | 28 | 28 | 38.4 | 1.10E-09 | 1 |
| Traes_2BL_2BA3A755A.1   | 299 | 355 | 299 | 355 | WRKY | 1  | 60 | 60 | 82.6 | 1.70E-23 | 2 |
|                         | 528 | 585 | 528 | 585 | WRKY | 1  | 60 | 60 | 88.2 | 3.00E-25 |   |
| Traes_2BL_6B75B32E3.1   | 223 | 279 | 222 | 280 | WRKY | 2  | 59 | 58 | 91.3 | 3.30E-26 | 1 |
| Traes_2BL_A5BFA97B9.1   | 152 | 208 | 152 | 209 | WRKY | 1  | 59 | 59 | 87.8 | 3.90E-25 | 1 |
| Traes_2BL_A69F6C5DF.1   | 127 | 184 | 127 | 184 | WRKY | 1  | 60 | 60 | 90.4 | 6.10E-26 | 1 |
| Traes_2BS_380EC4D1E.1   | 199 | 253 | 199 | 254 | WRKY | 1  | 59 | 59 | 78   | 4.60E-22 | 2 |
|                         | 363 | 420 | 363 | 420 | WRKY | 1  | 60 | 60 | 87.2 | 6.10E-25 |   |
| Traes_2BS_B65714572.1   | 119 | 179 | 119 | 179 | WRKY | 1  | 60 | 62 | 95.4 | 1.70E-27 | 1 |
| Traes_2BS_D435A8999.1   | 141 | 197 | 141 | 197 | WRKY | 1  | 60 | 60 | 84.7 | 3.80E-24 | 2 |
|                         | 314 | 371 | 314 | 371 | WRKY | 1  | 60 | 60 | 92.2 | 1.70E-26 |   |
| Traes_2BS_F3097F116.1   | 112 | 169 | 112 | 169 | WRKY | 1  | 60 | 61 | 94.6 | 3.00E-27 | 1 |
| Traes_2DL_04535D371.1   | 127 | 184 | 127 | 184 | WRKY | 1  | 60 | 60 | 89.2 | 1.40E-25 | 1 |
| Traes_2DL_362A1F535.1   | 24  | 69  | 24  | 70  | WRKY | 1  | 45 | 47 | 55.4 | 5.10E-15 | 1 |
| Traes_2DL_4F9F8F1F0.1   | 152 | 208 | 152 | 209 | WRKY | 1  | 59 | 59 | 87.8 | 3.90E-25 | 1 |
| Traes_2DL_F600B5FDF.1   | 30  | 86  | 29  | 87  | WRKY | 2  | 59 | 58 | 93.9 | 4.90E-27 | 1 |
| Traes_2DS_0F2500A60.1   | 99  | 156 | 99  | 156 | WRKY | 1  | 60 | 61 | 94.8 | 2.70E-27 | 1 |
| Traes_2DS_97E3E7CFC.1   | 141 | 197 | 141 | 197 | WRKY | 1  | 60 | 60 | 84.7 | 3.80E-24 | 2 |
|                         | 315 | 372 | 315 | 372 | WRKY | 1  | 60 | 60 | 92.2 | 1.70E-26 |   |
| Traes_2DS_AD8820C42.1   | 166 | 186 | 166 | 188 | WRKY | 1  | 21 | 21 | 27.1 | 3.50E-06 | 1 |
| Traes_2DS_F6FBC974C.2   | 189 | 243 | 189 | 244 | WRKY | 1  | 59 | 59 | 75.8 | 2.20E-21 | 2 |
|                         | 353 | 373 | 353 | 373 | WRKY | 1  | 21 | 21 | 28.9 | 1.00E-06 |   |
| Traes_3AL_140B829CB.2   | 194 | 251 | 194 | 251 | WRKY | 1  | 60 | 60 | 88.8 | 2.00E-25 | 1 |
| Traes_3AL_1B73D2C12.1   | 13  | 51  | 9   | 52  | WRKY | 19 | 59 | 41 | 44.6 | 1.20E-11 | 1 |
| Traes_3AL_2297D6E18.1   | 68  | 127 | 67  | 128 | WRKY | 2  | 59 | 60 | 81.6 | 3.50E-23 | 1 |
| Traes_3AL_3160E1F30.1   | 2   | 57  | 1   | 58  | WRKY | 2  | 59 | 58 | 98.1 | 2.50E-28 | 1 |
| Traes_3AL_4769A72F1.1   | 1   | 38  | 1   | 38  | WRKY | 21 | 60 | 40 | 49.9 | 2.80E-13 | 1 |
| Traes_3AL_67ECA2932.1   | 18  | 39  | 18  | 45  | WRKY | 1  | 22 | 22 | 31.5 | 1.50E-07 | 1 |
| Traes_3AL_6E92D4E1F.1   | 9   | 68  | 9   | 69  | WRKY | 1  | 59 | 61 | 91.5 | 2.80E-26 | 1 |
| Traes_3AL_AB2BAE660.1   | 120 | 155 | 120 | 155 | WRKY | 1  | 37 | 37 | 53.6 | 1.90E-14 | 1 |
| Traes_3AL_DED8A29EC.1   | 48  | 68  | 48  | 70  | WRKY | 1  | 21 | 21 | 31.9 | 1.10E-07 | 1 |
| Traes_3AL_F326C5B8E.1   | 41  | 97  | 41  | 98  | WRKY | 1  | 59 | 59 | 90.4 | 6.10E-26 | 1 |
| Traes_3AS_5CD024A9E.1   | 19  | 76  | 18  | 76  | WRKY | 2  | 60 | 59 | 99   | 1.30E-28 | 1 |
| Traes_3B_8B0D448D8.1    | 50  | 109 | 49  | 110 | WRKY | 2  | 59 | 60 | 84.1 | 5.90E-24 | 1 |
| Traes_3B_990298FF5.1    | 217 | 272 | 217 | 273 | WRKY | 1  | 59 | 59 | 85.7 | 1.80E-24 | 2 |
|                         | 381 | 438 | 381 | 438 | WRKY | 1  | 60 | 60 | 88.4 | 2.50E-25 |   |
| TRAES3BF001300030CFD_t1 | 105 | 162 | 104 | 163 | WRKY | 2  | 59 | 59 | 83.7 | 7.60E-24 | 1 |
| TRAES3BF003800010CFD_t1 | 307 | 364 | 306 | 364 | WRKY | 2  | 60 | 59 | 93.3 | 7.40E-27 | 2 |
|                         | 105 | 162 | 104 | 163 | WRKY | 2  | 59 | 59 | 83.5 | 8.50E-24 |   |
| TRAES3BF005100020CFD_t1 | 128 | 147 | 127 | 147 | WRKY | 2  | 21 | 20 | 27.2 | 3.40E-06 | 1 |
| TRAES3BF005100030CFD_t1 | 128 | 148 | 127 | 150 | WRKY | 2  | 22 | 21 | 27   | 3.80E-06 | 2 |
|                         | 157 | 222 | 156 | 222 | WRKY | 2  | 60 | 66 | 72.4 | 2.60E-20 |   |
| TRAES3BF021100090CFD_t1 | 195 | 252 | 195 | 252 | WRKY | 1  | 60 | 60 | 89.7 | 1.00E-25 | 1 |
| TRAES3BF021300010CFD_t1 | 195 | 252 | 195 | 252 | WRKY | 1  | 60 | 60 | 89.7 | 1.00E-25 | 1 |
| TRAES3BF029000080CFD_t1 | 80  | 137 | 79  | 137 | WRKY | 2  | 60 | 59 | 88.7 | 2.00E-25 | 2 |

|                         |      |      |      |      |      |    |    |    |      |          |   |
|-------------------------|------|------|------|------|------|----|----|----|------|----------|---|
|                         | 177  | 233  | 177  | 234  | WRKY | 1  | 59 | 59 | 86.5 | 1.00E-24 |   |
| TRAES3BF051200110CFD_t1 | 123  | 182  | 123  | 183  | WRKY | 1  | 59 | 61 | 85.6 | 2.00E-24 | 1 |
| TRAES3BF058500060CFD_t1 | 167  | 224  | 167  | 224  | WRKY | 1  | 60 | 60 | 89.9 | 8.70E-26 | 1 |
| TRAES3BF066700160CFD_t1 | 129  | 185  | 129  | 186  | WRKY | 1  | 59 | 59 | 78.6 | 3.00E-22 | 1 |
| TRAES3BF073300120CFD_t1 | 75   | 131  | 74   | 132  | WRKY | 2  | 59 | 58 | 88.2 | 2.90E-25 | 1 |
| TRAES3BF081400030CFD_t1 | 28   | 83   | 27   | 84   | WRKY | 2  | 59 | 58 | 68.2 | 5.20E-19 | 1 |
| TRAES3BF090100100CFD_t1 | 151  | 206  | 150  | 207  | WRKY | 2  | 59 | 58 | 91.7 | 2.40E-26 | 1 |
| TRAES3BF111700140CFD_t1 | 116  | 172  | 116  | 173  | WRKY | 1  | 59 | 59 | 83.6 | 8.20E-24 | 1 |
| TRAES3BF180700010CFD_t1 | 163  | 220  | 162  | 220  | WRKY | 2  | 60 | 59 | 77.1 | 8.70E-22 | 1 |
| TRAES3BF267200010CFD_t1 | 119  | 175  | 119  | 176  | WRKY | 1  | 59 | 59 | 83.2 | 1.10E-23 | 1 |
| Traes_3DL_2551BF2C1.1   | 20   | 52   | 19   | 52   | WRKY | 2  | 32 | 33 | 43.4 | 2.80E-11 | 1 |
| Traes_3DL_48F7A19D2.1   | 68   | 127  | 67   | 128  | WRKY | 2  | 59 | 60 | 84.6 | 4.00E-24 | 1 |
| Traes_3DL_678D51EAD.1   | 31   | 68   | 31   | 68   | WRKY | 1  | 36 | 38 | 55.4 | 5.40E-15 | 1 |
| Traes_3DL_7456F61A3.1   | 12   | 52   | 11   | 53   | WRKY | 2  | 40 | 41 | 66   | 2.60E-18 | 1 |
| Traes_3DL_DF0D3F3FE.1   | 6    | 62   | 6    | 63   | WRKY | 1  | 59 | 59 | 84.1 | 5.80E-24 | 1 |
| Traes_3DS_9A02CF31D.1   | 219  | 278  | 219  | 279  | WRKY | 1  | 59 | 61 | 88.2 | 3.10E-25 | 1 |
| Traes_3DS_F6B1E6078.1   | 24   | 62   | 24   | 63   | WRKY | 1  | 40 | 40 | 64.9 | 5.60E-18 | 1 |
| Traes_4AL_234E1CDF6.1   | 65   | 120  | 65   | 121  | WRKY | 1  | 59 | 59 | 72.6 | 2.20E-20 | 1 |
| Traes_4AL_2EEEECCC4B.1  | 94   | 150  | 94   | 150  | WRKY | 1  | 60 | 60 | 80.4 | 8.00E-23 | 2 |
|                         | 261  | 318  | 261  | 318  | WRKY | 1  | 60 | 60 | 87.8 | 4.00E-25 |   |
| Traes_4AL_3E11167D9.1   | 225  | 262  | 225  | 262  | WRKY | 1  | 38 | 38 | 59.1 | 3.80E-16 | 1 |
| Traes_4AL_98B1C762B.1   | 283  | 339  | 282  | 340  | WRKY | 2  | 59 | 58 | 94.8 | 2.50E-27 | 1 |
| Traes_4AL_9E0D1CFA6.1   | 42   | 102  | 42   | 103  | WRKY | 1  | 59 | 61 | 85.8 | 1.70E-24 | 1 |
| Traes_4AL_C2A825B6D.1   | 43   | 81   | 43   | 81   | WRKY | 1  | 40 | 40 | 60.4 | 1.40E-16 | 1 |
| Traes_4AS_0DA136E0E.1   | 5    | 56   | 3    | 56   | WRKY | 10 | 60 | 53 | 58   | 8.30E-16 | 1 |
| Traes_4AS_70DF607CC.1   | 33   | 93   | 33   | 94   | WRKY | 1  | 59 | 61 | 84.7 | 3.60E-24 | 1 |
| Traes_4BL_A8C6FBEB6.1   | 33   | 93   | 33   | 94   | WRKY | 1  | 59 | 61 | 84.7 | 3.60E-24 | 1 |
| Traes_4BL_EFEC50B26.2   | 88   | 144  | 88   | 144  | WRKY | 1  | 60 | 60 | 80.9 | 5.70E-23 | 2 |
|                         | 255  | 278  | 255  | 283  | WRKY | 1  | 24 | 24 | 34.5 | 1.70E-08 |   |
| Traes_4BS_A6D9EB0E5.1   | 98   | 158  | 98   | 159  | WRKY | 1  | 59 | 61 | 85.3 | 2.50E-24 | 1 |
| Traes_4BS_CE839571B.2   | 273  | 326  | 272  | 329  | WRKY | 2  | 56 | 55 | 83.8 | 7.30E-24 | 1 |
| Traes_4DL_3140A8240.1   | 33   | 93   | 33   | 94   | WRKY | 1  | 59 | 61 | 84.7 | 3.60E-24 |   |
| Traes_4DS_3BE557D5C.2   | 274  | 326  | 273  | 327  | WRKY | 2  | 55 | 54 | 81.5 | 3.80E-23 | 1 |
| Traes_4DS_CFC487CE5.2   | 53   | 108  | 53   | 109  | WRKY | 1  | 59 | 59 | 72.7 | 2.10E-20 | 1 |
| Traes_4DS_DC3C9DC42.2   | 203  | 259  | 203  | 259  | WRKY | 1  | 60 | 60 | 79.9 | 1.20E-22 | 2 |
|                         | 370  | 427  | 370  | 427  | WRKY | 1  | 60 | 60 | 87.3 | 5.90E-25 |   |
| Traes_4DS_FE38A59D0.1   | 42   | 102  | 42   | 103  | WRKY | 1  | 59 | 61 | 85.8 | 1.70E-24 | 1 |
| Traes_5AL_06A6F9328.2   | 31   | 88   | 31   | 88   | WRKY | 1  | 60 | 60 | 91.6 | 2.60E-26 | 1 |
| Traes_5AL_69A969FF4.1   | 34   | 106  | 33   | 106  | WRKY | 2  | 60 | 73 | 82.1 | 2.30E-23 | 1 |
| Traes_5AL_6F7D1D441.1   | 53   | 109  | 52   | 110  | WRKY | 2  | 59 | 58 | 80.6 | 7.00E-23 | 1 |
| Traes_5AL_6FDB440FB.1   | 4    | 50   | 2    | 50   | WRKY | 20 | 60 | 47 | 43   | 3.90E-11 | 1 |
| Traes_5AL_7164FEAC3.1   | 46   | 83   | 46   | 83   | WRKY | 1  | 38 | 38 | 56   | 3.50E-15 | 1 |
| Traes_5AL_A3653B781.1   | 52   | 108  | 51   | 109  | WRKY | 2  | 59 | 58 | 95.4 | 1.70E-27 | 1 |
| Traes_5AL_B4E8A3115.2   | 1333 | 1392 | 1333 | 1393 | WRKY | 1  | 59 | 61 | 87   | 7.20E-25 | 1 |
| Traes_5AL_E566BD64E.1   | 1    | 48   | 1    | 48   | WRKY | 11 | 60 | 50 | 61.2 | 8.10E-17 | 1 |
| Traes_5AL_E644A6A0B.1   | 117  | 172  | 116  | 172  | WRKY | 2  | 60 | 59 | 85.8 | 1.70E-24 | 2 |
|                         | 277  | 329  | 275  | 330  | WRKY | 3  | 59 | 57 | 78.1 | 4.40E-22 |   |
| Traes_5AL_ED3ADED51.3   | 278  | 334  | 278  | 334  | WRKY | 1  | 60 | 60 | 87.8 | 4.10E-25 | 2 |
|                         | 491  | 548  | 491  | 548  | WRKY | 1  | 60 | 60 | 88.6 | 2.30E-25 |   |

|                       |     |     |     |     |      |   |    |    |      |          |   |
|-----------------------|-----|-----|-----|-----|------|---|----|----|------|----------|---|
| Traes_5AS_433D3E526.1 | 70  | 126 | 69  | 127 | WRKY | 2 | 59 | 58 | 93.6 | 6.40E-27 | 1 |
| Traes_5AS_9C6171380.1 | 92  | 148 | 92  | 148 | WRKY | 1 | 60 | 60 | 85.8 | 1.70E-24 | 2 |
|                       | 249 | 306 | 249 | 306 | WRKY | 1 | 60 | 60 | 91.6 | 2.50E-26 |   |
| Traes_5BL_0A3D332A8.1 | 122 | 181 | 122 | 182 | WRKY | 1 | 59 | 61 | 93.8 | 5.30E-27 | 1 |
| Traes_5BL_175E7FC38.1 | 133 | 197 | 132 | 197 | WRKY | 2 | 60 | 65 | 79.4 | 1.70E-22 | 1 |
| Traes_5BL_17A712C94.1 | 278 | 334 | 278 | 334 | WRKY | 1 | 60 | 60 | 87.5 | 5.00E-25 | 2 |
|                       | 491 | 548 | 491 | 548 | WRKY | 1 | 60 | 60 | 88.3 | 2.70E-25 |   |
| Traes_5BL_8688F70C9.1 | 234 | 290 | 233 | 291 | WRKY | 2 | 59 | 58 | 93.7 | 5.70E-27 | 1 |
| Traes_5BL_8BEF7F9CD.1 | 172 | 230 | 172 | 230 | WRKY | 1 | 60 | 60 | 86.5 | 1.00E-24 | 1 |
| Traes_5BL_90757F0CC.1 | 173 | 231 | 173 | 231 | WRKY | 1 | 60 | 60 | 86.5 | 1.00E-24 | 1 |
| Traes_5BL_A522C62D1.1 | 117 | 172 | 116 | 172 | WRKY | 2 | 60 | 59 | 85.8 | 1.70E-24 | 2 |
|                       | 277 | 329 | 275 | 330 | WRKY | 3 | 59 | 57 | 78.1 | 4.40E-22 |   |
| Traes_5BL_AEF9FE805.2 | 333 | 389 | 332 | 390 | WRKY | 2 | 59 | 58 | 92.2 | 1.70E-26 | 1 |
| Traes_5BL_B9DD3E76F.1 | 193 | 250 | 192 | 250 | WRKY | 2 | 60 | 59 | 88.7 | 2.10E-25 | 1 |
| Traes_5BL_C1D6B6B74.2 | 143 | 200 | 143 | 200 | WRKY | 1 | 60 | 60 | 90.4 | 6.10E-26 | 1 |
| Traes_5BL_D3C383CF5.1 | 191 | 247 | 191 | 247 | WRKY | 1 | 60 | 60 | 76.4 | 1.50E-21 | 2 |
|                       | 315 | 337 | 315 | 339 | WRKY | 1 | 23 | 23 | 34   | 2.50E-08 |   |
| Traes_5BL_E294922A9.2 | 308 | 364 | 307 | 365 | WRKY | 2 | 59 | 58 | 86.6 | 9.60E-25 | 1 |
| Traes_5BL_F853EA802.1 | 125 | 184 | 125 | 185 | WRKY | 1 | 59 | 61 | 92.2 | 1.70E-26 | 1 |
| Traes_5BS_C46781248.1 | 87  | 143 | 87  | 143 | WRKY | 1 | 60 | 60 | 85.8 | 1.70E-24 | 2 |
|                       | 244 | 301 | 244 | 301 | WRKY | 1 | 60 | 60 | 91.7 | 2.50E-26 |   |
| Traes_5BS_E0345D5DF.2 | 289 | 345 | 288 | 346 | WRKY | 2 | 59 | 58 | 90   | 8.30E-26 | 1 |
| Traes_5DL_09F1F8F79.1 | 130 | 194 | 129 | 194 | WRKY | 2 | 60 | 65 | 77.7 | 5.80E-22 | 1 |
| Traes_5DL_1733FB4DA.1 | 802 | 861 | 802 | 862 | WRKY | 1 | 59 | 61 | 76.9 | 1.00E-21 | 2 |
|                       | 917 | 976 | 917 | 977 | WRKY | 1 | 59 | 61 | 88   | 3.40E-25 |   |
| Traes_5DL_21F7C6BF7.2 | 278 | 334 | 278 | 334 | WRKY | 1 | 60 | 60 | 87.8 | 4.00E-25 | 2 |
|                       | 491 | 548 | 491 | 548 | WRKY | 1 | 60 | 60 | 88.6 | 2.20E-25 |   |
| Traes_5DL_2553A6C33.1 | 14  | 70  | 13  | 71  | WRKY | 2 | 59 | 58 | 89.8 | 9.40E-26 | 1 |
| Traes_5DL_32D78D06A.1 | 47  | 105 | 47  | 105 | WRKY | 1 | 60 | 60 | 88.3 | 2.80E-25 | 1 |
| Traes_5DL_46E3AC8D6.1 | 187 | 243 | 187 | 243 | WRKY | 1 | 60 | 60 | 76.4 | 1.50E-21 | 2 |
|                       | 314 | 340 | 314 | 342 | WRKY | 1 | 27 | 27 | 39.1 | 6.40E-10 |   |
| Traes_5DL_4BA2CC560.2 | 117 | 172 | 116 | 172 | WRKY | 2 | 60 | 59 | 85.8 | 1.70E-24 | 2 |
|                       | 278 | 330 | 276 | 331 | WRKY | 3 | 59 | 57 | 78.1 | 4.40E-22 |   |
| Traes_5DL_5C93510D5.1 | 125 | 184 | 125 | 185 | WRKY | 1 | 59 | 61 | 89.7 | 9.90E-26 | 1 |
| Traes_5DL_7E2053226.2 | 37  | 94  | 37  | 94  | WRKY | 1 | 60 | 60 | 91.4 | 3.00E-26 | 1 |
| Traes_5DL_A54ED44C9.2 | 327 | 383 | 326 | 384 | WRKY | 2 | 59 | 58 | 92.2 | 1.70E-26 | 1 |
| Traes_5DL_C93641E43.1 | 121 | 180 | 121 | 181 | WRKY | 1 | 59 | 61 | 93.8 | 5.40E-27 | 1 |
| Traes_5DL_E4A6D1889.2 | 188 | 245 | 187 | 245 | WRKY | 2 | 60 | 59 | 88.7 | 2.10E-25 | 1 |
| Traes_5DS_5DEA5C9E3.1 | 229 | 285 | 229 | 285 | WRKY | 1 | 60 | 60 | 85.1 | 2.80E-24 | 2 |
|                       | 386 | 443 | 386 | 443 | WRKY | 1 | 60 | 60 | 91   | 4.10E-26 |   |
| Traes_5DS_D83DEA9B0.1 | 290 | 346 | 289 | 347 | WRKY | 2 | 59 | 58 | 91   | 3.90E-26 | 1 |
| Traes_6AL_0C0899C15.1 | 317 | 375 | 317 | 375 | WRKY | 1 | 60 | 60 | 93.1 | 8.60E-27 | 1 |
| Traes_6AL_A5FB7CFA5.1 | 230 | 287 | 229 | 287 | WRKY | 2 | 60 | 59 | 90.9 | 4.40E-26 | 1 |
| Traes_6AL_BA4636569.1 | 162 | 219 | 162 | 219 | WRKY | 1 | 60 | 60 | 87.9 | 3.80E-25 | 1 |
| Traes_6AS_68775100B.1 | 9   | 68  | 9   | 69  | WRKY | 1 | 59 | 61 | 90.2 | 7.30E-26 | 1 |
| Traes_6AS_DA75BB1FD.1 | 193 | 250 | 193 | 251 | WRKY | 1 | 59 | 59 | 88.7 | 2.10E-25 | 1 |
| Traes_6BL_B92FA1D38.1 | 2   | 58  | 2   | 58  | WRKY | 1 | 58 | 58 | 95.2 | 1.90E-27 | 1 |
| Traes_6BL_DD840863A.1 | 161 | 218 | 161 | 218 | WRKY | 1 | 60 | 60 | 87.9 | 3.80E-25 | 1 |
| Traes_6BL_EEAA2A7E3.1 | 42  | 99  | 41  | 99  | WRKY | 2 | 60 | 59 | 93.8 | 5.50E-27 | 1 |

|                        |     |     |     |     |      |    |    |    |      |          |   |
|------------------------|-----|-----|-----|-----|------|----|----|----|------|----------|---|
| Traes_6DL_AB95B0CE0.1  | 315 | 373 | 315 | 373 | WRKY | 1  | 60 | 60 | 93.1 | 8.70E-27 | 1 |
| Traes_6DL_D29E210A1.1  | 162 | 219 | 162 | 219 | WRKY | 1  | 60 | 60 | 87.9 | 3.80E-25 | 1 |
| Traes_6DL_D4F2CDDDC.1  | 230 | 287 | 229 | 287 | WRKY | 2  | 60 | 59 | 90.9 | 4.40E-26 | 1 |
| Traes_6DS_8F684013D.2  | 77  | 134 | 77  | 135 | WRKY | 1  | 59 | 59 | 91.1 | 3.90E-26 | 1 |
| Traes_6DS_BF71C1557.2  | 91  | 125 | 83  | 126 | WRKY | 25 | 59 | 36 | 24.4 | 2.60E-05 | 1 |
| Traes_7AL_48C81DE03.1  | 201 | 255 | 200 | 256 | WRKY | 2  | 59 | 58 | 77.4 | 7.10E-22 | 2 |
|                        | 369 | 389 | 368 | 394 | WRKY | 2  | 22 | 21 | 28.4 | 1.40E-06 |   |
| Traes_7AL_48C81DE031.1 | 201 | 255 | 200 | 256 | WRKY | 2  | 59 | 58 | 77.4 | 7.10E-22 | 2 |
|                        | 369 | 389 | 368 | 394 | WRKY | 2  | 22 | 21 | 28.4 | 1.40E-06 |   |
| Traes_7AL_AC56CC184.1  | 51  | 91  | 51  | 91  | WRKY | 1  | 41 | 41 | 61.7 | 5.50E-17 | 1 |
| Traes_7AS_C9DF68E53.2  | 243 | 301 | 243 | 301 | WRKY | 1  | 60 | 60 | 91.6 | 2.50E-26 | 1 |
| Traes_7BL_53AA25AA1.1  | 5   | 54  | 5   | 55  | WRKY | 1  | 49 | 51 | 64.4 | 7.90E-18 | 1 |
| Traes_7BL_A46F1A830.2  | 101 | 155 | 100 | 156 | WRKY | 2  | 59 | 58 | 78.3 | 3.60E-22 | 2 |
|                        | 269 | 290 | 268 | 297 | WRKY | 2  | 23 | 22 | 32   | 1.10E-07 |   |
| Traes_7DL_5968FA56C.1  | 62  | 119 | 62  | 120 | WRKY | 1  | 59 | 59 | 84.6 | 4.00E-24 | 1 |
| Traes_7DL_A9EF00572.1  | 112 | 171 | 112 | 172 | WRKY | 1  | 59 | 61 | 75.9 | 2.10E-21 | 1 |
| Traes_7DL_B09854286.1  | 52  | 109 | 52  | 110 | WRKY | 1  | 59 | 59 | 86.8 | 8.00E-25 | 1 |
| Traes_7DL_B86B36F67.1  | 23  | 80  | 23  | 81  | WRKY | 1  | 59 | 59 | 86.4 | 1.10E-24 | 1 |
| Traes_7DL_F849918EA.2  | 62  | 119 | 62  | 120 | WRKY | 1  | 59 | 59 | 83.6 | 8.10E-24 | 1 |
| Traes_7DS_01F74C6F3.1  | 29  | 88  | 29  | 89  | WRKY | 1  | 59 | 61 | 93.3 | 7.50E-27 | 1 |
| Traes_7DS_24C563960.1  | 101 | 155 | 100 | 156 | WRKY | 2  | 59 | 58 | 78.7 | 2.90E-22 | 2 |
|                        | 269 | 290 | 268 | 297 | WRKY | 2  | 23 | 22 | 32   | 1.10E-07 |   |

***Oryza sativa* (88 WRKYs)**

|                 |     |     |     |     |      |   |    |    |      |          |   |
|-----------------|-----|-----|-----|-----|------|---|----|----|------|----------|---|
| OS01T0182700-01 | 204 | 260 | 204 | 261 | WRKY | 1 | 59 | 59 | 87.5 | 4.90E-25 | 1 |
| OS01T0185900-01 | 238 | 296 | 238 | 296 | WRKY | 1 | 60 | 60 | 91.9 | 2.10E-26 | 1 |
| OS01T0186000-01 | 81  | 137 | 81  | 138 | WRKY | 1 | 59 | 59 | 82.8 | 1.40E-23 | 1 |
| OS01T0289600-00 | 137 | 194 | 137 | 194 | WRKY | 1 | 60 | 60 | 85.4 | 2.30E-24 | 1 |
| OS01T0584900-01 | 125 | 182 | 124 | 182 | WRKY | 2 | 60 | 59 | 91.4 | 3.10E-26 | 1 |
| OS01T0586800-00 | 33  | 90  | 32  | 90  | WRKY | 2 | 60 | 59 | 87.3 | 5.60E-25 | 1 |
| OS01T0624700-01 | 178 | 235 | 177 | 235 | WRKY | 2 | 60 | 59 | 80   | 1.10E-22 | 1 |
| OS01T0626400-01 | 205 | 262 | 205 | 262 | WRKY | 1 | 60 | 60 | 88.6 | 2.30E-25 | 1 |
| OS01T0656400-00 | 101 | 160 | 101 | 161 | WRKY | 1 | 59 | 61 | 88.6 | 2.20E-25 | 1 |
| OS01T0714800-01 | 160 | 216 | 160 | 217 | WRKY | 1 | 59 | 59 | 82.9 | 1.30E-23 | 1 |
| OS01T0730700-01 | 95  | 151 | 94  | 152 | WRKY | 2 | 59 | 58 | 91.1 | 3.60E-26 | 1 |
| OS01T0734000-01 | 176 | 233 | 176 | 233 | WRKY | 1 | 60 | 60 | 90.9 | 4.30E-26 | 1 |
| OS01T0750100-01 | 99  | 156 | 98  | 156 | WRKY | 2 | 60 | 59 | 91.6 | 2.60E-26 | 1 |
| OS01T0750100-02 | 99  | 151 | 98  | 152 | WRKY | 2 | 55 | 54 | 80.5 | 7.40E-23 | 1 |
| OS01T0750100-03 | 99  | 156 | 98  | 156 | WRKY | 2 | 60 | 59 | 91.3 | 3.20E-26 | 1 |
| OS01T0820400-00 | 71  | 130 | 70  | 131 | WRKY | 2 | 59 | 60 | 83.9 | 6.60E-24 | 1 |
| OS01T0820700-00 | 16  | 75  | 15  | 76  | WRKY | 2 | 59 | 60 | 87.4 | 5.30E-25 | 1 |
| OS01T0821600-01 | 114 | 174 | 113 | 175 | WRKY | 2 | 59 | 61 | 79.4 | 1.60E-22 | 1 |
| OS01T0826400-01 | 220 | 275 | 220 | 276 | WRKY | 1 | 59 | 59 | 88.8 | 2.00E-25 | 2 |
|                 | 385 | 442 | 385 | 442 | WRKY | 1 | 60 | 60 | 89.8 | 9.30E-26 |   |
| OS01T0842801-00 | 166 | 186 | 165 | 190 | WRKY | 2 | 22 | 21 | 33.1 | 4.90E-08 | 1 |
| OS01T0972800-01 | 160 | 216 | 160 | 217 | WRKY | 1 | 59 | 59 | 87.4 | 5.40E-25 | 1 |
| OS02T0265200-01 | 176 | 232 | 175 | 233 | WRKY | 2 | 59 | 58 | 90.8 | 4.50E-26 | 1 |
| OS02T0462800-01 | 169 | 225 | 168 | 226 | WRKY | 2 | 59 | 58 | 86.4 | 1.10E-24 | 1 |
| OS02T0652100-01 | 240 | 297 | 239 | 297 | WRKY | 2 | 60 | 59 | 89.6 | 1.10E-25 | 1 |
| OS02T0698800-01 | 138 | 159 | 138 | 163 | WRKY | 1 | 22 | 22 | 31.7 | 1.30E-07 | 1 |

|                 |     |     |     |     |      |    |    |    |      |          |   |
|-----------------|-----|-----|-----|-----|------|----|----|----|------|----------|---|
| OS02T0770500-00 | 415 | 473 | 415 | 473 | WRKY | 1  | 60 | 60 | 92.7 | 1.20E-26 | 1 |
| OS03T0321700-01 | 137 | 193 | 137 | 193 | WRKY | 1  | 60 | 60 | 86   | 1.50E-24 | 1 |
| OS03T0335200-01 | 304 | 325 | 304 | 328 | WRKY | 1  | 22 | 22 | 32   | 1.10E-07 | 1 |
| OS03T0444900-00 | 33  | 93  | 33  | 94  | WRKY | 1  | 59 | 61 | 84   | 6.30E-24 | 2 |
|                 | 92  | 152 | 92  | 152 | WRKY | 1  | 60 | 62 | 84.2 | 5.30E-24 |   |
| OS03T0657400-00 | 322 | 378 | 321 | 379 | WRKY | 2  | 59 | 58 | 93.2 | 8.50E-27 | 1 |
| OS03T0741400-01 | 48  | 105 | 48  | 106 | WRKY | 1  | 59 | 59 | 71.8 | 4.00E-20 | 1 |
| OS03T0758000-01 | 52  | 109 | 52  | 109 | WRKY | 1  | 60 | 60 | 91.6 | 2.60E-26 | 1 |
| OS03T0758950-00 | 200 | 257 | 199 | 257 | WRKY | 2  | 60 | 59 | 89.6 | 1.10E-25 | 2 |
|                 | 194 | 250 | 194 | 250 | WRKY | 1  | 60 | 60 | 78   | 4.50E-22 |   |
| OS03T0855100-01 | 340 | 397 | 340 | 397 | WRKY | 1  | 60 | 60 | 85.3 | 2.40E-24 | 1 |
| OS04T0287400-01 | 523 | 579 | 523 | 579 | WRKY | 1  | 60 | 60 | 82   | 2.50E-23 | 1 |
| OS04T0471700-00 | 755 | 812 | 755 | 812 | WRKY | 1  | 60 | 60 | 87.1 | 6.40E-25 | 2 |
|                 | 248 | 304 | 247 | 305 | WRKY | 2  | 59 | 58 | 90.9 | 4.40E-26 |   |
| OS04T0545000-01 | 164 | 221 | 163 | 221 | WRKY | 2  | 60 | 59 | 90   | 8.50E-26 | 1 |
| OS04T0597300-01 | 170 | 226 | 170 | 227 | WRKY | 1  | 59 | 59 | 87.4 | 5.30E-25 | 1 |
| OS04T0605100-01 | 223 | 279 | 222 | 280 | WRKY | 2  | 59 | 58 | 92.3 | 1.60E-26 | 1 |
| OS05T0129800-01 | 40  | 60  | 39  | 63  | WRKY | 2  | 22 | 21 | 27.9 | 2.00E-06 | 2 |
|                 | 123 | 164 | 119 | 164 | WRKY | 18 | 60 | 43 | 44.8 | 1.10E-11 |   |
| OS05T0137500-00 | 222 | 279 | 221 | 279 | WRKY | 2  | 60 | 59 | 92.3 | 1.60E-26 | 1 |
| OS05T0183100-01 | 114 | 170 | 114 | 171 | WRKY | 1  | 59 | 59 | 81.6 | 3.40E-23 | 1 |
| OS05T0321900-01 | 228 | 287 | 228 | 288 | WRKY | 1  | 59 | 61 | 86.6 | 9.30E-25 | 1 |
| OS05T0322900-01 | 118 | 178 | 118 | 178 | WRKY | 1  | 60 | 62 | 77.8 | 5.50E-22 | 1 |
| OS05T0322900-02 | 118 | 138 | 118 | 138 | WRKY | 1  | 21 | 21 | 25.7 | 1.00E-05 | 1 |
| OS05T0343400-01 | 190 | 247 | 190 | 247 | WRKY | 1  | 60 | 60 | 88.4 | 2.60E-25 | 2 |
|                 | 352 | 409 | 352 | 409 | WRKY | 1  | 60 | 60 | 89.3 | 1.40E-25 |   |
| OS05T0474800-01 | 154 | 213 | 154 | 214 | WRKY | 1  | 59 | 61 | 90.8 | 4.50E-26 | 2 |
|                 | 219 | 275 | 219 | 275 | WRKY | 1  | 60 | 60 | 86.8 | 8.00E-25 |   |
| OS05T0478400-00 | 392 | 449 | 392 | 449 | WRKY | 1  | 60 | 60 | 90.6 | 5.40E-26 | 1 |
| OS05T0478700-00 | 136 | 196 | 136 | 197 | WRKY | 1  | 59 | 61 | 70.7 | 8.80E-20 | 1 |
| OS05T0478800-00 | 21  | 86  | 21  | 86  | WRKY | 1  | 60 | 66 | 84.4 | 4.60E-24 | 1 |
| OS05T0537100-00 | 135 | 191 | 135 | 192 | WRKY | 1  | 59 | 59 | 87.6 | 4.50E-25 | 1 |
| OS05T0565900-00 | 201 | 258 | 201 | 258 | WRKY | 1  | 60 | 60 | 91.4 | 3.10E-26 | 1 |
| OS05T0571200-01 | 106 | 165 | 106 | 166 | WRKY | 1  | 59 | 61 | 87.6 | 4.60E-25 | 1 |
| OS05T0583000-01 | 188 | 245 | 188 | 245 | WRKY | 1  | 60 | 60 | 93.8 | 5.20E-27 | 1 |
| OS06T0146250-00 | 256 | 314 | 256 | 314 | WRKY | 1  | 60 | 60 | 94.7 | 2.90E-27 | 1 |
| OS06T0158100-00 | 144 | 204 | 144 | 204 | WRKY | 1  | 60 | 62 | 93.1 | 8.80E-27 | 1 |
| OS06T0504900-00 | 217 | 272 | 216 | 274 | WRKY | 2  | 58 | 57 | 77.1 | 8.80E-22 | 1 |
| OS06T0649000-01 | 220 | 277 | 220 | 278 | WRKY | 1  | 59 | 59 | 87.5 | 4.80E-25 | 1 |
| OS06T0649000-02 | 194 | 251 | 194 | 252 | WRKY | 1  | 59 | 59 | 87.7 | 4.30E-25 | 1 |
| OS07T0111400-00 | 124 | 181 | 124 | 181 | WRKY | 1  | 60 | 60 | 93.7 | 5.80E-27 | 1 |
| OS07T0583700-01 | 236 | 292 | 236 | 292 | WRKY | 1  | 60 | 60 | 84.8 | 3.50E-24 | 2 |
|                 | 410 | 467 | 410 | 467 | WRKY | 1  | 60 | 60 | 91.7 | 2.50E-26 |   |
| OS07T0596900-00 | 170 | 226 | 170 | 226 | WRKY | 1  | 60 | 60 | 79.9 | 1.20E-22 | 2 |
|                 | 339 | 395 | 339 | 396 | WRKY | 1  | 59 | 59 | 87.8 | 4.20E-25 |   |
| OS07T0680400-01 | 66  | 121 | 65  | 121 | WRKY | 2  | 60 | 59 | 55.4 | 5.20E-15 | 1 |
| OS08T0198100-00 | 280 | 336 | 279 | 337 | WRKY | 2  | 59 | 58 | 90.6 | 5.40E-26 | 1 |
| OS08T0235800-00 | 229 | 284 | 228 | 284 | WRKY | 2  | 60 | 59 | 81   | 5.50E-23 | 1 |
| OS08T0276200-01 | 277 | 332 | 277 | 332 | WRKY | 1  | 60 | 60 | 82.1 | 2.40E-23 | 1 |

|                 |     |     |     |     |      |    |    |    |      |          |   |
|-----------------|-----|-----|-----|-----|------|----|----|----|------|----------|---|
| OS08T0386200-01 | 488 | 545 | 488 | 545 | WRKY | 1  | 60 | 60 | 88.4 | 2.70E-25 | 1 |
| OS08T0499300-01 | 130 | 190 | 130 | 190 | WRKY | 1  | 60 | 62 | 92.8 | 1.10E-26 | 2 |
|                 | 126 | 185 | 126 | 186 | WRKY | 1  | 59 | 61 | 91.4 | 3.00E-26 |   |
| OS08T0499300-02 | 166 | 224 | 166 | 224 | WRKY | 1  | 60 | 60 | 85   | 2.90E-24 | 2 |
|                 | 1   | 41  | 1   | 41  | WRKY | 16 | 60 | 45 | 46.1 | 4.10E-12 |   |
| OS09T0334500-01 | 197 | 254 | 197 | 254 | WRKY | 1  | 60 | 60 | 89.5 | 1.20E-25 | 1 |
| OS09T0417600-01 | 166 | 224 | 166 | 224 | WRKY | 1  | 60 | 60 | 85   | 2.90E-24 | 1 |
| OS09T0417600-02 | 434 | 491 | 434 | 491 | WRKY | 1  | 60 | 60 | 88.5 | 2.50E-25 | 1 |
| OS09T0417800-01 | 144 | 201 | 144 | 202 | WRKY | 1  | 59 | 59 | 82.6 | 1.70E-23 | 1 |
| OS09T0481700-01 | 434 | 491 | 434 | 491 | WRKY | 1  | 60 | 60 | 88.5 | 2.50E-25 | 1 |
| OS09T0481700-02 | 113 | 177 | 113 | 177 | WRKY | 1  | 60 | 65 | 77.2 | 8.20E-22 | 1 |
| OS11T0116900-01 | 146 | 214 | 145 | 215 | WRKY | 2  | 59 | 69 | 79.3 | 1.80E-22 | 1 |
| OS11T0117400-00 | 44  | 104 | 44  | 105 | WRKY | 1  | 59 | 61 | 87.6 | 4.50E-25 | 1 |
| OS11T0117500-01 | 131 | 150 | 130 | 152 | WRKY | 2  | 21 | 20 | 28.4 | 1.40E-06 | 1 |
| OS11T0117600-00 | 137 | 194 | 137 | 194 | WRKY | 1  | 60 | 61 | 95.1 | 2.10E-27 | 1 |
| OS11T0490900-01 | 3   | 31  | 1   | 32  | WRKY | 30 | 59 | 30 | 30.7 | 2.70E-07 | 1 |
| OS11T0685700-00 | 69  | 129 | 69  | 129 | WRKY | 1  | 60 | 62 | 77.9 | 5.00E-22 | 2 |
|                 | 12  | 54  | 9   | 55  | WRKY | 14 | 59 | 46 | 50.9 | 1.30E-13 |   |
| OS11T0686250-00 | 42  | 102 | 42  | 103 | WRKY | 1  | 59 | 61 | 87.7 | 4.40E-25 | 1 |
| OS12T0116400-00 | 73  | 137 | 73  | 137 | WRKY | 1  | 60 | 65 | 77.6 | 6.10E-22 | 1 |
| OS12T0116600-01 | 147 | 215 | 146 | 216 | WRKY | 2  | 59 | 69 | 79   | 2.30E-22 | 1 |
| OS12T0116700-01 | 129 | 185 | 129 | 185 | WRKY | 1  | 60 | 60 | 86.4 | 1.10E-24 | 1 |
| OS12T0507300-00 | 286 | 343 | 286 | 343 | WRKY | 1  | 60 | 60 | 91.5 | 2.70E-26 | 2 |
|                 | 297 | 353 | 296 | 354 | WRKY | 2  | 59 | 58 | 93.9 | 5.00E-27 |   |
| OS12T0597700-01 | 122 | 182 | 122 | 183 | WRKY | 1  | 59 | 62 | 80.8 | 6.30E-23 | 1 |
| OS12T0597700-02 | 197 | 253 | 196 | 254 | WRKY | 2  | 59 | 58 | 94.6 | 3.00E-27 | 1 |

***Zea mays* (163 WRKYs)**

|                   |     |     |     |     |      |    |    |    |      |          |   |
|-------------------|-----|-----|-----|-----|------|----|----|----|------|----------|---|
| AC165171.2_FGP002 | 129 | 185 | 129 | 186 | WRKY | 1  | 59 | 59 | 87.7 | 4.50E-25 | 1 |
| AC193630.3_FGP003 | 248 | 285 | 248 | 300 | WRKY | 1  | 38 | 38 | 61.7 | 5.60E-17 | 1 |
| AC194362.3_FGP003 | 117 | 136 | 116 | 146 | WRKY | 2  | 21 | 20 | 29.6 | 5.90E-07 | 1 |
| AC198725.4_FGP009 | 198 | 255 | 198 | 255 | WRKY | 1  | 60 | 60 | 88.7 | 2.00E-25 | 1 |
| AC205562.3_FGP002 | 116 | 176 | 116 | 176 | WRKY | 1  | 60 | 62 | 91.1 | 3.60E-26 | 1 |
| AC208110.2_FGP001 | 238 | 259 | 237 | 263 | WRKY | 2  | 23 | 22 | 25.2 | 1.40E-05 | 2 |
|                   | 301 | 338 | 298 | 338 | WRKY | 22 | 60 | 39 | 47.9 | 1.20E-12 |   |
| AC209050.3_FGP003 | 331 | 388 | 331 | 389 | WRKY | 1  | 59 | 59 | 86.4 | 1.10E-24 | 1 |
| GRMZM2G003551_P01 | 141 | 201 | 141 | 201 | WRKY | 1  | 60 | 62 | 88.5 | 2.50E-25 | 1 |
| GRMZM2G004060_P01 | 168 | 228 | 168 | 228 | WRKY | 1  | 60 | 62 | 77.6 | 6.10E-22 | 1 |
| GRMZM2G005207_P01 | 112 | 174 | 111 | 175 | WRKY | 2  | 59 | 63 | 81.4 | 4.00E-23 | 1 |
| GRMZM2G006497_P01 | 150 | 207 | 149 | 207 | WRKY | 2  | 60 | 59 | 83.7 | 7.90E-24 | 1 |
| GRMZM2G008029_P01 | 220 | 276 | 220 | 276 | WRKY | 1  | 60 | 60 | 79.2 | 2.00E-22 | 2 |
|                   | 350 | 407 | 350 | 407 | WRKY | 1  | 60 | 60 | 84.3 | 5.00E-24 |   |
| GRMZM2G012724_P01 | 204 | 261 | 204 | 261 | WRKY | 1  | 60 | 60 | 86   | 1.50E-24 | 2 |
|                   | 366 | 423 | 366 | 423 | WRKY | 1  | 60 | 60 | 88.6 | 2.30E-25 |   |
| GRMZM2G012724_P02 | 202 | 259 | 202 | 259 | WRKY | 1  | 60 | 60 | 86   | 1.50E-24 | 2 |
|                   | 364 | 421 | 364 | 421 | WRKY | 1  | 60 | 60 | 88.6 | 2.30E-25 |   |
| GRMZM2G012724_P03 | 131 | 188 | 131 | 188 | WRKY | 1  | 60 | 60 | 90   | 8.20E-26 | 1 |
| GRMZM2G012724_P04 | 204 | 261 | 204 | 261 | WRKY | 1  | 60 | 60 | 86.8 | 8.40E-25 | 1 |
| GRMZM2G013391_P01 | 82  | 139 | 81  | 139 | WRKY | 2  | 60 | 59 | 89.9 | 9.00E-26 | 1 |
| GRMZM2G015433_P01 | 143 | 200 | 143 | 200 | WRKY | 1  | 60 | 60 | 90.2 | 7.30E-26 | 1 |

|                   |     |     |     |     |      |    |    |    |      |          |   |
|-------------------|-----|-----|-----|-----|------|----|----|----|------|----------|---|
| GRMZM2G018487_P01 | 333 | 389 | 332 | 390 | WRKY | 2  | 59 | 58 | 93.1 | 8.80E-27 | 1 |
| GRMZM2G018487_P02 | 333 | 389 | 332 | 390 | WRKY | 2  | 59 | 58 | 93.1 | 8.80E-27 | 1 |
| GRMZM2G018721_P01 | 132 | 189 | 132 | 189 | WRKY | 1  | 60 | 60 | 90.8 | 4.70E-26 | 1 |
| GRMZM2G020254_P01 | 132 | 186 | 131 | 187 | WRKY | 2  | 59 | 58 | 87.4 | 5.30E-25 | 1 |
| GRMZM2G020254_P02 | 112 | 166 | 111 | 167 | WRKY | 2  | 59 | 58 | 87.7 | 4.50E-25 | 1 |
| GRMZM2G020254_P03 | 160 | 214 | 159 | 215 | WRKY | 2  | 59 | 58 | 87.1 | 6.60E-25 | 1 |
| GRMZM2G024898_P01 | 244 | 301 | 243 | 301 | WRKY | 2  | 60 | 59 | 90   | 8.10E-26 | 1 |
| GRMZM2G025895_P01 | 139 | 198 | 139 | 199 | WRKY | 1  | 59 | 61 | 88.2 | 3.00E-25 | 1 |
| GRMZM2G027972_P01 | 277 | 333 | 277 | 333 | WRKY | 1  | 60 | 60 | 85.5 | 2.10E-24 | 2 |
|                   | 537 | 576 | 533 | 576 | WRKY | 19 | 60 | 42 | 47.9 | 1.10E-12 |   |
| GRMZM2G029282_P01 | 118 | 180 | 118 | 180 | WRKY | 1  | 60 | 63 | 76.2 | 1.70E-21 | 1 |
| GRMZM2G029292_P02 | 66  | 108 | 60  | 109 | WRKY | 19 | 59 | 43 | 47.5 | 1.50E-12 | 1 |
| GRMZM2G029292_P03 | 54  | 113 | 53  | 114 | WRKY | 2  | 59 | 60 | 87.3 | 5.70E-25 | 1 |
| GRMZM2G030272_P01 | 30  | 90  | 30  | 91  | WRKY | 1  | 59 | 61 | 86.5 | 1.00E-24 | 1 |
| GRMZM2G031963_P01 | 282 | 338 | 282 | 338 | WRKY | 1  | 60 | 60 | 82.7 | 1.50E-23 | 2 |
|                   | 498 | 555 | 498 | 555 | WRKY | 1  | 60 | 60 | 87.5 | 5.00E-25 |   |
| GRMZM2G034421_P01 | 134 | 195 | 134 | 195 | WRKY | 1  | 60 | 62 | 70   | 1.40E-19 | 1 |
| GRMZM2G036703_P01 | 246 | 301 | 246 | 302 | WRKY | 1  | 59 | 59 | 87.6 | 4.70E-25 | 2 |
|                   | 412 | 469 | 412 | 469 | WRKY | 1  | 60 | 60 | 87.1 | 6.40E-25 |   |
| GRMZM2G038158_P01 | 173 | 229 | 172 | 230 | WRKY | 2  | 59 | 58 | 85   | 2.90E-24 | 1 |
| GRMZM2G040298_P01 | 78  | 134 | 77  | 135 | WRKY | 2  | 59 | 58 | 87.4 | 5.20E-25 | 1 |
| GRMZM2G048450_P01 | 179 | 235 | 178 | 236 | WRKY | 2  | 59 | 58 | 89.2 | 1.50E-25 | 1 |
| GRMZM2G052671_P01 | 374 | 431 | 374 | 431 | WRKY | 1  | 60 | 60 | 87.8 | 3.90E-25 | 1 |
| GRMZM2G052671_P02 | 374 | 431 | 374 | 431 | WRKY | 1  | 60 | 60 | 87.8 | 3.90E-25 | 1 |
| GRMZM2G054125_P01 | 138 | 195 | 138 | 195 | WRKY | 1  | 60 | 61 | 94.5 | 3.30E-27 | 1 |
| GRMZM2G057011_P01 | 192 | 250 | 192 | 250 | WRKY | 1  | 60 | 60 | 85.6 | 2.00E-24 | 1 |
| GRMZM2G057116_P01 | 108 | 164 | 108 | 165 | WRKY | 1  | 59 | 59 | 85.8 | 1.70E-24 | 1 |
| GRMZM2G057116_P02 | 36  | 73  | 14  | 74  | WRKY | 20 | 59 | 40 | 46   | 4.50E-12 | 1 |
| GRMZM2G059562_P01 | 109 | 167 | 108 | 167 | WRKY | 2  | 60 | 60 | 83.3 | 1.00E-23 | 1 |
| GRMZM2G060918_P01 | 30  | 83  | 30  | 87  | WRKY | 1  | 52 | 54 | 75.2 | 3.50E-21 | 1 |
| GRMZM2G061408_P01 | 139 | 198 | 139 | 199 | WRKY | 1  | 59 | 61 | 88.2 | 3.00E-25 | 1 |
| GRMZM2G063216_P01 | 44  | 104 | 44  | 105 | WRKY | 1  | 59 | 61 | 87.4 | 5.40E-25 | 1 |
| GRMZM2G063216_P02 | 2   | 30  | 1   | 31  | WRKY | 31 | 59 | 29 | 32.1 | 1.00E-07 | 1 |
| GRMZM2G063216_P03 | 44  | 66  | 44  | 71  | WRKY | 1  | 23 | 23 | 29.1 | 8.80E-07 | 1 |
| GRMZM2G063880_P01 | 96  | 155 | 96  | 156 | WRKY | 1  | 59 | 61 | 83.7 | 7.80E-24 | 1 |
| GRMZM2G065290_P01 | 72  | 131 | 71  | 132 | WRKY | 2  | 59 | 60 | 77.8 | 5.20E-22 | 1 |
| GRMZM2G070211_P01 | 287 | 343 | 286 | 344 | WRKY | 2  | 59 | 58 | 92.3 | 1.50E-26 | 1 |
| GRMZM2G071907_P01 | 213 | 269 | 212 | 270 | WRKY | 2  | 59 | 58 | 92.6 | 1.30E-26 | 1 |
| GRMZM2G071907_P03 | 200 | 256 | 199 | 257 | WRKY | 2  | 59 | 58 | 92.7 | 1.20E-26 | 1 |
| GRMZM2G073272_P01 | 249 | 305 | 248 | 306 | WRKY | 2  | 59 | 58 | 87.6 | 4.60E-25 | 1 |
| GRMZM2G076657_P01 | 228 | 284 | 228 | 284 | WRKY | 1  | 60 | 60 | 86   | 1.50E-24 | 2 |
|                   | 385 | 441 | 385 | 442 | WRKY | 1  | 59 | 59 | 87.6 | 4.70E-25 |   |
| GRMZM2G076657_P02 | 228 | 284 | 228 | 284 | WRKY | 1  | 60 | 60 | 86.1 | 1.40E-24 | 2 |
|                   | 385 | 441 | 385 | 442 | WRKY | 1  | 59 | 59 | 87.6 | 4.50E-25 |   |
| GRMZM2G083350_P01 | 280 | 337 | 279 | 337 | WRKY | 2  | 60 | 59 | 90.6 | 5.20E-26 | 1 |
| GRMZM2G083717_P01 | 192 | 249 | 191 | 249 | WRKY | 2  | 60 | 59 | 90   | 8.40E-26 | 1 |
| GRMZM2G090594_P01 | 235 | 291 | 234 | 292 | WRKY | 2  | 59 | 58 | 93.1 | 9.00E-27 | 1 |
| GRMZM2G091331_P01 | 226 | 282 | 225 | 283 | WRKY | 2  | 59 | 58 | 92.2 | 1.70E-26 | 1 |
| GRMZM2G091331_P02 | 226 | 245 | 225 | 245 | WRKY | 2  | 21 | 20 | 27.6 | 2.50E-06 | 1 |

|                   |     |     |     |     |      |    |    |    |      |          |   |
|-------------------|-----|-----|-----|-----|------|----|----|----|------|----------|---|
| GRMZM2G092694_P01 | 266 | 301 | 265 | 304 | WRKY | 2  | 37 | 36 | 55.9 | 3.60E-15 | 1 |
| GRMZM2G099593_P01 | 131 | 194 | 131 | 195 | WRKY | 1  | 59 | 64 | 81.9 | 2.70E-23 | 1 |
| GRMZM2G101405_P01 | 129 | 185 | 129 | 186 | WRKY | 1  | 59 | 59 | 84.3 | 5.10E-24 | 1 |
| GRMZM2G102583_P02 | 253 | 309 | 252 | 310 | WRKY | 2  | 59 | 58 | 91.9 | 2.00E-26 | 1 |
| GRMZM2G105140_P01 | 176 | 233 | 175 | 233 | WRKY | 2  | 60 | 59 | 79.1 | 2.10E-22 | 1 |
| GRMZM2G106560_P01 | 129 | 186 | 129 | 186 | WRKY | 1  | 60 | 61 | 94.4 | 3.50E-27 | 1 |
| GRMZM2G106560_P02 | 2   | 42  | 1   | 42  | WRKY | 18 | 60 | 44 | 55.4 | 5.30E-15 | 1 |
| GRMZM2G111354_P01 | 149 | 206 | 149 | 206 | WRKY | 1  | 60 | 60 | 91.3 | 3.30E-26 | 1 |
| GRMZM2G111711_P01 | 201 | 258 | 201 | 259 | WRKY | 1  | 59 | 59 | 86.3 | 1.20E-24 | 1 |
| GRMZM2G120320_P01 | 234 | 291 | 234 | 292 | WRKY | 1  | 59 | 59 | 87.3 | 5.90E-25 | 1 |
| GRMZM2G123387_P01 | 205 | 261 | 205 | 262 | WRKY | 1  | 59 | 59 | 86.4 | 1.10E-24 | 1 |
| GRMZM2G123387_P02 | 24  | 80  | 24  | 81  | WRKY | 1  | 59 | 59 | 89.4 | 1.30E-25 | 1 |
| GRMZM2G125653_P01 | 154 | 212 | 154 | 212 | WRKY | 1  | 60 | 60 | 87   | 7.00E-25 | 1 |
| GRMZM2G125653_P02 | 67  | 125 | 67  | 125 | WRKY | 1  | 60 | 60 | 87.8 | 3.90E-25 | 1 |
| GRMZM2G127064_P01 | 218 | 277 | 218 | 278 | WRKY | 1  | 59 | 61 | 83.7 | 7.50E-24 | 1 |
| GRMZM2G130374_P01 | 307 | 363 | 306 | 364 | WRKY | 2  | 59 | 58 | 90.7 | 4.80E-26 | 1 |
| GRMZM2G130854_P01 | 229 | 284 | 229 | 285 | WRKY | 1  | 59 | 59 | 83   | 1.30E-23 | 2 |
|                   | 402 | 459 | 402 | 459 | WRKY | 1  | 60 | 60 | 91.7 | 2.40E-26 |   |
| GRMZM2G137802_P01 | 105 | 161 | 105 | 162 | WRKY | 1  | 59 | 59 | 86.5 | 1.00E-24 | 1 |
| GRMZM2G138683_P01 | 213 | 270 | 212 | 270 | WRKY | 2  | 60 | 59 | 90.2 | 7.00E-26 | 1 |
| GRMZM2G139815_P01 | 109 | 168 | 109 | 169 | WRKY | 1  | 59 | 61 | 93   | 9.60E-27 | 1 |
| GRMZM2G141299_P01 | 90  | 147 | 89  | 147 | WRKY | 2  | 60 | 59 | 90.4 | 6.20E-26 | 1 |
| GRMZM2G141299_P02 | 45  | 102 | 44  | 102 | WRKY | 2  | 60 | 59 | 90.8 | 4.70E-26 | 1 |
| GRMZM2G141299_P03 | 3   | 41  | 1   | 41  | WRKY | 21 | 60 | 40 | 49.9 | 2.70E-13 | 1 |
| GRMZM2G143204_P01 | 139 | 195 | 139 | 196 | WRKY | 1  | 59 | 59 | 92.1 | 1.80E-26 | 1 |
| GRMZM2G143204_P02 | 139 | 191 | 139 | 192 | WRKY | 1  | 59 | 59 | 69.9 | 1.50E-19 | 1 |
| GRMZM2G143204_P03 | 139 | 195 | 139 | 196 | WRKY | 1  | 59 | 59 | 92.1 | 1.80E-26 | 1 |
| GRMZM2G143765_P01 | 230 | 286 | 230 | 286 | WRKY | 1  | 60 | 60 | 86   | 1.50E-24 | 2 |
|                   | 387 | 444 | 387 | 444 | WRKY | 1  | 60 | 60 | 89.4 | 1.30E-25 |   |
| GRMZM2G145554_P01 | 207 | 264 | 207 | 264 | WRKY | 1  | 60 | 60 | 87.7 | 4.40E-25 | 1 |
| GRMZM2G147880_P01 | 331 | 387 | 330 | 388 | WRKY | 2  | 59 | 58 | 93.1 | 8.80E-27 | 1 |
| GRMZM2G148087_P01 | 217 | 272 | 217 | 273 | WRKY | 1  | 59 | 59 | 87.8 | 3.90E-25 | 2 |
|                   | 384 | 441 | 384 | 441 | WRKY | 1  | 60 | 60 | 88.4 | 2.50E-25 |   |
| GRMZM2G148561_P01 | 242 | 298 | 241 | 299 | WRKY | 2  | 59 | 58 | 92.4 | 1.50E-26 | 1 |
| GRMZM2G149219_P01 | 3   | 60  | 3   | 61  | WRKY | 1  | 59 | 59 | 72.3 | 2.80E-20 | 1 |
| GRMZM2G149683_P01 | 173 | 230 | 172 | 230 | WRKY | 2  | 60 | 59 | 78.2 | 3.90E-22 | 1 |
| GRMZM2G151407_P01 | 134 | 191 | 134 | 191 | WRKY | 1  | 60 | 60 | 89.8 | 9.80E-26 | 1 |
| GRMZM2G151407_P02 | 387 | 444 | 387 | 444 | WRKY | 1  | 60 | 60 | 88.6 | 2.20E-25 | 1 |
| GRMZM2G151444_P01 | 216 | 272 | 216 | 273 | WRKY | 1  | 59 | 59 | 87.4 | 5.20E-25 | 1 |
| GRMZM2G151763_P01 | 201 | 258 | 201 | 258 | WRKY | 1  | 60 | 60 | 94.4 | 3.40E-27 | 1 |
| GRMZM2G156529_P01 | 134 | 191 | 133 | 191 | WRKY | 2  | 60 | 59 | 85.1 | 2.90E-24 | 1 |
| GRMZM2G158328_P01 | 122 | 184 | 121 | 184 | WRKY | 2  | 60 | 63 | 77.4 | 7.00E-22 | 1 |
| GRMZM2G161411_P01 | 48  | 105 | 48  | 106 | WRKY | 1  | 59 | 59 | 73.4 | 1.30E-20 | 1 |
| GRMZM2G163054_P01 | 102 | 125 | 102 | 148 | WRKY | 1  | 24 | 24 | 28.2 | 1.60E-06 | 1 |
| GRMZM2G163054_P02 | 101 | 157 | 101 | 158 | WRKY | 1  | 59 | 59 | 85   | 3.00E-24 | 1 |
| GRMZM2G163054_P03 | 144 | 166 | 144 | 189 | WRKY | 1  | 23 | 23 | 27.7 | 2.40E-06 | 1 |
| GRMZM2G163054_P04 | 102 | 158 | 102 | 159 | WRKY | 1  | 59 | 59 | 85   | 3.00E-24 | 1 |
| GRMZM2G163418_P01 | 134 | 193 | 134 | 194 | WRKY | 1  | 59 | 61 | 90.7 | 4.90E-26 | 1 |
| GRMZM2G163418_P02 | 134 | 154 | 134 | 157 | WRKY | 1  | 21 | 21 | 30   | 4.50E-07 | 1 |

|                   |     |     |     |     |      |    |    |    |      |          |   |
|-------------------|-----|-----|-----|-----|------|----|----|----|------|----------|---|
| GRMZM2G164082_P01 | 348 | 404 | 347 | 405 | WRKY | 2  | 59 | 58 | 89.9 | 9.00E-26 | 1 |
| GRMZM2G169149_P01 | 103 | 160 | 102 | 160 | WRKY | 2  | 60 | 59 | 84.5 | 4.20E-24 | 1 |
| GRMZM2G169564_P01 | 166 | 235 | 165 | 236 | WRKY | 2  | 59 | 70 | 78.1 | 4.30E-22 | 1 |
| GRMZM2G169966_P01 | 51  | 107 | 51  | 107 | WRKY | 1  | 60 | 60 | 89.5 | 1.20E-25 | 2 |
|                   | 229 | 286 | 229 | 286 | WRKY | 1  | 60 | 60 | 81.7 | 3.30E-23 |   |
| GRMZM2G171428_P01 | 212 | 268 | 212 | 268 | WRKY | 1  | 60 | 60 | 83.9 | 6.70E-24 | 2 |
|                   | 381 | 438 | 381 | 438 | WRKY | 1  | 60 | 60 | 89.5 | 1.20E-25 |   |
| GRMZM2G171428_P02 | 212 | 268 | 212 | 268 | WRKY | 1  | 60 | 60 | 84.3 | 5.10E-24 | 2 |
|                   | 381 | 402 | 381 | 404 | WRKY | 1  | 22 | 22 | 30.6 | 2.90E-07 |   |
| GRMZM2G173680_P01 | 301 | 357 | 300 | 358 | WRKY | 2  | 59 | 58 | 92.3 | 1.60E-26 | 1 |
| GRMZM2G173680_P02 | 301 | 357 | 300 | 358 | WRKY | 2  | 59 | 58 | 92.3 | 1.60E-26 | 1 |
| GRMZM2G176489_P01 | 289 | 346 | 288 | 346 | WRKY | 2  | 60 | 59 | 83.3 | 1.00E-23 | 1 |
| GRMZM2G304573_P01 | 134 | 192 | 134 | 192 | WRKY | 1  | 60 | 60 | 83.6 | 8.00E-24 | 1 |
| GRMZM2G324999_P01 | 130 | 190 | 130 | 190 | WRKY | 1  | 60 | 62 | 94.4 | 3.40E-27 | 1 |
| GRMZM2G327349_P01 | 294 | 351 | 293 | 351 | WRKY | 2  | 60 | 59 | 88.8 | 1.90E-25 | 1 |
| GRMZM2G354384_P01 | 3   | 60  | 2   | 60  | WRKY | 2  | 60 | 60 | 41.5 | 1.10E-10 | 1 |
| GRMZM2G366795_P01 | 313 | 370 | 312 | 370 | WRKY | 2  | 60 | 59 | 93.2 | 8.50E-27 | 1 |
| GRMZM2G366795_P02 | 311 | 368 | 310 | 368 | WRKY | 2  | 60 | 59 | 93.2 | 8.50E-27 | 1 |
| GRMZM2G377217_P01 | 160 | 216 | 160 | 217 | WRKY | 1  | 59 | 59 | 85.5 | 2.00E-24 | 1 |
| GRMZM2G377217_P02 | 160 | 181 | 160 | 183 | WRKY | 1  | 22 | 22 | 31.2 | 1.90E-07 | 1 |
| GRMZM2G381378_P01 | 132 | 193 | 132 | 193 | WRKY | 1  | 60 | 62 | 81   | 5.30E-23 | 1 |
| GRMZM2G382350_P01 | 53  | 112 | 52  | 113 | WRKY | 2  | 59 | 60 | 86.8 | 8.20E-25 | 1 |
| GRMZM2G383594_P01 | 210 | 267 | 209 | 267 | WRKY | 2  | 60 | 59 | 87.7 | 4.30E-25 | 1 |
| GRMZM2G391892_P01 | 2   | 30  | 1   | 31  | WRKY | 31 | 59 | 29 | 29.5 | 6.30E-07 | 1 |
| GRMZM2G398506_P01 | 174 | 230 | 174 | 230 | WRKY | 1  | 60 | 60 | 85.4 | 2.30E-24 | 2 |
|                   | 348 | 405 | 348 | 405 | WRKY | 1  | 60 | 60 | 92.7 | 1.20E-26 |   |
| GRMZM2G398506_P02 | 230 | 286 | 230 | 286 | WRKY | 1  | 60 | 60 | 85.2 | 2.60E-24 | 2 |
|                   | 404 | 461 | 404 | 461 | WRKY | 1  | 60 | 60 | 92.5 | 1.30E-26 |   |
| GRMZM2G400559_P01 | 162 | 234 | 161 | 235 | WRKY | 2  | 59 | 73 | 78   | 4.70E-22 | 1 |
| GRMZM2G401521_P01 | 212 | 269 | 212 | 269 | WRKY | 1  | 60 | 60 | 91.3 | 3.20E-26 | 1 |
| GRMZM2G401521_P02 | 212 | 234 | 212 | 246 | WRKY | 1  | 23 | 23 | 30.8 | 2.60E-07 | 1 |
| GRMZM2G408462_P01 | 130 | 189 | 130 | 190 | WRKY | 1  | 59 | 61 | 86.1 | 1.40E-24 | 1 |
| GRMZM2G411766_P01 | 126 | 185 | 126 | 186 | WRKY | 1  | 59 | 61 | 86.2 | 1.20E-24 | 1 |
| GRMZM2G414315_P01 | 181 | 237 | 180 | 238 | WRKY | 2  | 59 | 58 | 73.9 | 9.10E-21 | 1 |
| GRMZM2G425430_P01 | 118 | 174 | 118 | 174 | WRKY | 1  | 60 | 60 | 82.9 | 1.40E-23 | 2 |
|                   | 287 | 302 | 287 | 303 | WRKY | 1  | 16 | 16 | 21.1 | 0.00026  |   |
| GRMZM2G432583_P01 | 125 | 185 | 125 | 186 | WRKY | 1  | 59 | 62 | 82   | 2.70E-23 | 1 |
| GRMZM2G441031_P01 | 124 | 187 | 123 | 187 | WRKY | 2  | 60 | 64 | 71.8 | 3.90E-20 | 1 |
| GRMZM2G448605_P01 | 359 | 416 | 358 | 416 | WRKY | 2  | 60 | 59 | 89.7 | 1.00E-25 | 1 |
| GRMZM2G449681_P01 | 200 | 257 | 200 | 257 | WRKY | 1  | 60 | 60 | 86.1 | 1.30E-24 | 2 |
|                   | 365 | 422 | 365 | 422 | WRKY | 1  | 60 | 60 | 90.7 | 5.10E-26 |   |
| GRMZM2G449681_P02 | 8   | 65  | 8   | 65  | WRKY | 1  | 60 | 60 | 93.7 | 5.60E-27 | 1 |
| GRMZM2G449681_P03 | 8   | 65  | 8   | 65  | WRKY | 1  | 60 | 60 | 93.7 | 5.60E-27 | 1 |
| GRMZM2G451035_P01 | 132 | 151 | 131 | 153 | WRKY | 2  | 21 | 20 | 23.4 | 5.20E-05 | 2 |
|                   | 169 | 215 | 158 | 216 | WRKY | 19 | 59 | 47 | 38.8 | 7.80E-10 |   |
| GRMZM2G453571_P01 | 187 | 244 | 187 | 244 | WRKY | 1  | 60 | 60 | 91.4 | 3.00E-26 | 1 |
| GRMZM2G461648_P01 | 132 | 198 | 132 | 199 | WRKY | 1  | 59 | 68 | 78.9 | 2.40E-22 | 1 |
| GRMZM2G468056_P01 | 98  | 138 | 94  | 138 | WRKY | 20 | 60 | 42 | 43.7 | 2.40E-11 | 1 |
| GRMZM2G475984_P01 | 145 | 201 | 145 | 202 | WRKY | 1  | 59 | 59 | 84.1 | 5.90E-24 | 1 |

|                   |     |     |     |     |      |    |    |    |      |          |   |
|-------------------|-----|-----|-----|-----|------|----|----|----|------|----------|---|
| GRMZM2G501775_P01 | 270 | 316 | 261 | 317 | WRKY | 18 | 59 | 47 | 37.9 | 1.50E-09 | 1 |
| GRMZM2G516301_P01 | 121 | 177 | 121 | 178 | WRKY | 1  | 59 | 59 | 83.8 | 7.30E-24 | 1 |
| GRMZM2G549512_P01 | 251 | 306 | 250 | 306 | WRKY | 2  | 60 | 59 | 79.2 | 1.90E-22 | 2 |
|                   | 418 | 474 | 417 | 474 | WRKY | 2  | 60 | 59 | 89.2 | 1.50E-25 |   |
| GRMZM5G812272_P01 | 5   | 43  | 3   | 43  | WRKY | 20 | 60 | 41 | 50.2 | 2.20E-13 | 1 |
| GRMZM5G812272_P02 | 199 | 256 | 199 | 256 | WRKY | 1  | 60 | 60 | 93.9 | 5.10E-27 | 1 |
| GRMZM5G816457_P01 | 283 | 339 | 283 | 339 | WRKY | 1  | 60 | 60 | 82.2 | 2.20E-23 | 2 |
|                   | 491 | 548 | 491 | 548 | WRKY | 1  | 60 | 60 | 86   | 1.50E-24 |   |
| GRMZM5G816457_P02 | 283 | 339 | 283 | 339 | WRKY | 1  | 60 | 60 | 82.2 | 2.20E-23 | 2 |
|                   | 491 | 548 | 491 | 548 | WRKY | 1  | 60 | 60 | 86   | 1.50E-24 |   |
| GRMZM5G823157_P01 | 223 | 280 | 222 | 280 | WRKY | 2  | 60 | 59 | 90.2 | 7.40E-26 | 1 |
| GRMZM5G863420_P01 | 135 | 191 | 135 | 192 | WRKY | 1  | 59 | 59 | 86.4 | 1.10E-24 | 1 |
| GRMZM5G871347_P01 | 153 | 210 | 152 | 210 | WRKY | 2  | 60 | 59 | 96.8 | 6.10E-28 | 1 |
| GRMZM5G871347_P02 | 277 | 334 | 276 | 334 | WRKY | 2  | 60 | 59 | 96   | 1.10E-27 | 1 |
| GRMZM5G871347_P03 | 320 | 377 | 319 | 377 | WRKY | 2  | 60 | 59 | 95.8 | 1.20E-27 | 1 |
| GRMZM5G880069_P02 | 299 | 355 | 298 | 356 | WRKY | 2  | 59 | 58 | 92.3 | 1.60E-26 | 1 |
| GRMZM5G880069_P03 | 299 | 355 | 298 | 356 | WRKY | 2  | 59 | 58 | 92.3 | 1.60E-26 | 1 |

***Sorghum bicolor* (96 WRKYs)**

|               |      |      |      |      |      |    |    |    |      |          |   |
|---------------|------|------|------|------|------|----|----|----|------|----------|---|
| Sb01g000696.1 | 198  | 255  | 197  | 255  | WRKY | 2  | 60 | 59 | 89.9 | 8.60E-26 | 1 |
| Sb01g005070.1 | 222  | 278  | 221  | 279  | WRKY | 2  | 59 | 58 | 90.6 | 5.20E-26 | 1 |
| Sb01g007480.1 | 194  | 250  | 194  | 250  | WRKY | 1  | 60 | 60 | 79   | 2.20E-22 | 2 |
|               | 318  | 375  | 318  | 375  | WRKY | 1  | 60 | 60 | 79.5 | 1.60E-22 |   |
| Sb01g007570.1 | 147  | 204  | 147  | 204  | WRKY | 1  | 60 | 60 | 89.6 | 1.10E-25 | 1 |
| Sb01g008550.1 | 342  | 398  | 341  | 399  | WRKY | 2  | 59 | 58 | 93.1 | 9.10E-27 | 1 |
| Sb01g012870.1 | 3    | 60   | 3    | 61   | WRKY | 1  | 59 | 60 | 73.8 | 9.40E-21 | 1 |
| Sb01g014180.1 | 286  | 342  | 285  | 343  | WRKY | 2  | 59 | 58 | 93.2 | 8.30E-27 | 1 |
| Sb01g027770.1 | 194  | 251  | 193  | 251  | WRKY | 2  | 60 | 59 | 89.2 | 1.40E-25 | 1 |
| Sb01g032120.1 | 215  | 271  | 215  | 271  | WRKY | 1  | 60 | 60 | 83.4 | 9.60E-24 | 2 |
|               | 384  | 441  | 384  | 441  | WRKY | 1  | 60 | 60 | 89   | 1.80E-25 |   |
| Sb01g036180.1 | 110  | 170  | 110  | 170  | WRKY | 1  | 60 | 62 | 85.5 | 2.10E-24 | 1 |
| Sb01g036870.1 | 30   | 90   | 30   | 91   | WRKY | 1  | 59 | 61 | 87.5 | 4.80E-25 | 1 |
| Sb02g000960.1 | 175  | 213  | 169  | 213  | WRKY | 20 | 60 | 41 | 37   | 3.00E-09 | 1 |
| Sb02g008880.1 | 809  | 868  | 809  | 869  | WRKY | 1  | 59 | 61 | 52.2 | 5.20E-14 | 1 |
| Sb02g011050.1 | 16   | 73   | 15   | 73   | WRKY | 2  | 60 | 59 | 85.2 | 2.60E-24 | 1 |
| Sb02g021226.1 | 1354 | 1412 | 1354 | 1412 | WRKY | 1  | 60 | 60 | 78.5 | 3.20E-22 | 2 |
|               | 1487 | 1548 | 1487 | 1548 | WRKY | 1  | 60 | 62 | 69.7 | 1.80E-19 |   |
| Sb02g022280.1 | 107  | 166  | 107  | 167  | WRKY | 1  | 59 | 61 | 90.4 | 6.30E-26 | 1 |
| Sb02g022290.1 | 142  | 201  | 142  | 202  | WRKY | 1  | 59 | 61 | 91.5 | 2.80E-26 | 1 |
| Sb02g024760.1 | 167  | 225  | 167  | 225  | WRKY | 1  | 60 | 60 | 86.4 | 1.10E-24 | 1 |
| Sb02g024765.1 | 88   | 146  | 88   | 146  | WRKY | 1  | 60 | 60 | 86.4 | 1.10E-24 | 1 |
| Sb02g027950.1 | 405  | 462  | 405  | 462  | WRKY | 1  | 60 | 60 | 88.5 | 2.30E-25 | 1 |
| Sb02g037660.1 | 230  | 286  | 230  | 286  | WRKY | 1  | 60 | 60 | 85.5 | 2.10E-24 | 2 |
|               | 404  | 461  | 404  | 461  | WRKY | 1  | 60 | 60 | 92.6 | 1.30E-26 |   |
| Sb02g043030.1 | 126  | 186  | 126  | 186  | WRKY | 1  | 60 | 62 | 80.9 | 5.60E-23 | 1 |
| Sb03g000240.1 | 286  | 343  | 285  | 343  | WRKY | 2  | 60 | 59 | 95.4 | 1.70E-27 | 1 |
| Sb03g003360.1 | 138  | 194  | 138  | 195  | WRKY | 1  | 59 | 59 | 84.8 | 3.40E-24 | 1 |
| Sb03g003370.1 | 288  | 345  | 287  | 345  | WRKY | 2  | 60 | 59 | 89   | 1.60E-25 | 1 |
| Sb03g003640.1 | 218  | 274  | 218  | 275  | WRKY | 1  | 59 | 59 | 87.4 | 5.30E-25 | 1 |
| Sb03g011800.1 | 293  | 350  | 292  | 350  | WRKY | 2  | 60 | 59 | 88.8 | 1.90E-25 | 1 |

|               |     |     |     |     |      |    |    |    |      |          |   |
|---------------|-----|-----|-----|-----|------|----|----|----|------|----------|---|
| Sb03g026170.1 | 138 | 195 | 138 | 195 | WRKY | 1  | 60 | 60 | 86.2 | 1.30E-24 | 1 |
| Sb03g026280.1 | 150 | 208 | 150 | 208 | WRKY | 1  | 60 | 60 | 87.6 | 4.50E-25 | 1 |
| Sb03g028440.1 | 245 | 302 | 244 | 302 | WRKY | 2  | 60 | 59 | 78.7 | 2.80E-22 | 1 |
| Sb03g028530.1 | 213 | 270 | 213 | 270 | WRKY | 1  | 60 | 60 | 88.7 | 2.10E-25 | 1 |
| Sb03g029920.1 | 144 | 203 | 144 | 204 | WRKY | 1  | 59 | 61 | 86.9 | 7.70E-25 | 1 |
| Sb03g030480.1 | 209 | 266 | 209 | 266 | WRKY | 1  | 60 | 60 | 91.9 | 2.10E-26 | 1 |
| Sb03g032800.1 | 139 | 195 | 139 | 196 | WRKY | 1  | 59 | 59 | 82.5 | 1.90E-23 | 1 |
| Sb03g033640.1 | 95  | 151 | 94  | 152 | WRKY | 2  | 59 | 58 | 87.1 | 6.50E-25 | 1 |
| Sb03g033780.1 | 168 | 225 | 168 | 225 | WRKY | 1  | 60 | 60 | 91.1 | 3.90E-26 | 1 |
| Sb03g034670.1 | 99  | 156 | 98  | 156 | WRKY | 2  | 60 | 59 | 89.7 | 1.00E-25 | 1 |
| Sb03g038170.1 | 53  | 112 | 52  | 113 | WRKY | 2  | 59 | 60 | 87.3 | 5.80E-25 | 1 |
| Sb03g038180.1 | 68  | 127 | 67  | 128 | WRKY | 2  | 59 | 60 | 76.3 | 1.60E-21 | 1 |
| Sb03g038190.1 | 120 | 186 | 120 | 186 | WRKY | 1  | 60 | 67 | 76.8 | 1.10E-21 | 1 |
| Sb03g038200.1 | 124 | 184 | 123 | 184 | WRKY | 2  | 60 | 61 | 78   | 4.50E-22 | 1 |
| Sb03g038210.1 | 116 | 174 | 115 | 174 | WRKY | 2  | 60 | 60 | 83.1 | 1.20E-23 | 1 |
| Sb03g038510.1 | 248 | 303 | 248 | 304 | WRKY | 1  | 59 | 59 | 87.7 | 4.20E-25 | 2 |
|               | 409 | 466 | 409 | 466 | WRKY | 1  | 60 | 60 | 89.7 | 1.00E-25 |   |
| Sb03g039550.1 | 163 | 218 | 162 | 219 | WRKY | 2  | 59 | 58 | 89   | 1.60E-25 | 1 |
| Sb03g047350.1 | 141 | 197 | 141 | 198 | WRKY | 1  | 59 | 59 | 85.4 | 2.30E-24 | 1 |
| Sb04g005520.1 | 194 | 251 | 194 | 252 | WRKY | 1  | 59 | 59 | 87.7 | 4.30E-25 | 1 |
| Sb04g009800.1 | 171 | 227 | 170 | 228 | WRKY | 2  | 59 | 58 | 88.8 | 2.00E-25 | 1 |
| Sb04g016540.1 | 164 | 220 | 163 | 221 | WRKY | 2  | 59 | 58 | 88.6 | 2.20E-25 | 1 |
| Sb04g030930.1 | 233 | 290 | 232 | 290 | WRKY | 2  | 60 | 59 | 90.1 | 7.70E-26 | 1 |
| Sb04g033240.1 | 159 | 215 | 159 | 216 | WRKY | 1  | 59 | 59 | 85.5 | 2.00E-24 | 1 |
| Sb04g034440.1 | 319 | 377 | 319 | 377 | WRKY | 1  | 60 | 60 | 92.9 | 1.00E-26 | 1 |
| Sb05g001170.1 | 132 | 193 | 132 | 194 | WRKY | 1  | 59 | 62 | 83   | 1.30E-23 | 1 |
| Sb05g001175.1 | 25  | 69  | 19  | 70  | WRKY | 17 | 59 | 45 | 49.8 | 2.90E-13 | 1 |
| Sb05g001180.1 | 117 | 171 | 116 | 172 | WRKY | 2  | 59 | 61 | 43.7 | 2.40E-11 | 1 |
| Sb05g001200.1 | 118 | 167 | 104 | 167 | WRKY | 17 | 60 | 50 | 46   | 4.40E-12 | 1 |
| Sb05g001210.1 | 98  | 118 | 97  | 119 | WRKY | 2  | 22 | 21 | 29.5 | 6.60E-07 | 1 |
| Sb05g001220.1 | 121 | 191 | 120 | 191 | WRKY | 2  | 60 | 71 | 80   | 1.10E-22 | 1 |
| Sb05g017130.1 | 134 | 191 | 134 | 191 | WRKY | 1  | 60 | 61 | 94.3 | 3.60E-27 | 1 |
| Sb06g013835.1 | 146 | 205 | 146 | 206 | WRKY | 1  | 59 | 61 | 88.6 | 2.20E-25 | 1 |
| Sb06g019710.1 | 278 | 334 | 278 | 334 | WRKY | 1  | 60 | 60 | 82.5 | 1.80E-23 | 2 |
|               | 502 | 559 | 502 | 559 | WRKY | 1  | 60 | 60 | 87.7 | 4.40E-25 |   |
| Sb06g024220.1 | 169 | 225 | 169 | 226 | WRKY | 1  | 59 | 59 | 88   | 3.50E-25 | 1 |
| Sb06g027290.1 | 278 | 335 | 277 | 335 | WRKY | 2  | 60 | 59 | 89.5 | 1.20E-25 | 1 |
| Sb06g027710.1 | 232 | 288 | 231 | 289 | WRKY | 2  | 59 | 58 | 92.2 | 1.60E-26 | 1 |
| Sb07g005740.1 | 61  | 117 | 61  | 117 | WRKY | 1  | 60 | 60 | 42.7 | 4.70E-11 | 1 |
| Sb07g006230.1 | 367 | 421 | 366 | 422 | WRKY | 2  | 59 | 58 | 84.4 | 4.50E-24 | 1 |
| Sb07g006980.1 | 250 | 306 | 249 | 307 | WRKY | 2  | 59 | 58 | 94.1 | 4.40E-27 | 1 |
| Sb07g016330.1 | 254 | 309 | 253 | 309 | WRKY | 2  | 60 | 59 | 79.2 | 1.90E-22 | 2 |
|               | 421 | 477 | 420 | 477 | WRKY | 2  | 60 | 59 | 89.2 | 1.50E-25 |   |
| Sb07g019400.1 | 131 | 191 | 131 | 191 | WRKY | 1  | 60 | 62 | 94.1 | 4.40E-27 | 1 |
| Sb07g028430.1 | 89  | 145 | 89  | 145 | WRKY | 1  | 60 | 60 | 83   | 1.20E-23 | 2 |
|               | 299 | 356 | 299 | 356 | WRKY | 1  | 60 | 60 | 89   | 1.70E-25 |   |
| Sb08g002520.1 | 118 | 182 | 117 | 183 | WRKY | 2  | 59 | 65 | 81.2 | 4.70E-23 | 1 |
| Sb08g002540.1 | 104 | 152 | 94  | 152 | WRKY | 18 | 60 | 49 | 39.6 | 4.60E-10 | 1 |
| Sb08g002560.1 | 150 | 214 | 149 | 214 | WRKY | 2  | 60 | 65 | 77.9 | 5.00E-22 | 1 |

|               |      |      |      |      |      |    |    |    |      |          |   |
|---------------|------|------|------|------|------|----|----|----|------|----------|---|
| Sb08g002570.1 | 96   | 160  | 95   | 160  | WRKY | 2  | 60 | 65 | 73.3 | 1.30E-20 | 1 |
| Sb08g002590.1 | 42   | 98   | 42   | 99   | WRKY | 1  | 59 | 59 | 73.1 | 1.50E-20 | 1 |
| Sb08g005080.1 | 111  | 171  | 111  | 171  | WRKY | 1  | 60 | 62 | 78.3 | 3.70E-22 | 1 |
| Sb08g016240.1 | 231  | 287  | 231  | 287  | WRKY | 1  | 60 | 60 | 85.1 | 2.80E-24 | 2 |
|               | 388  | 445  | 388  | 445  | WRKY | 1  | 60 | 60 | 91   | 4.10E-26 |   |
| Sb08g020270.1 | 305  | 361  | 304  | 362  | WRKY | 2  | 59 | 58 | 94   | 4.60E-27 | 1 |
| Sb08g021870.1 | 1010 | 1050 | 1002 | 1051 | WRKY | 21 | 59 | 41 | 25.9 | 8.80E-06 | 1 |
| Sb09g005700.1 | 110  | 166  | 110  | 167  | WRKY | 1  | 59 | 59 | 85.8 | 1.70E-24 | 1 |
| Sb09g010210.1 | 191  | 212  | 191  | 214  | WRKY | 1  | 22 | 22 | 29.8 | 5.10E-07 | 1 |
| Sb09g015900.1 | 218  | 275  | 218  | 275  | WRKY | 1  | 60 | 60 | 86.1 | 1.30E-24 | 2 |
|               | 387  | 444  | 387  | 444  | WRKY | 1  | 60 | 60 | 89.2 | 1.50E-25 |   |
| Sb09g015900.2 | 217  | 274  | 217  | 274  | WRKY | 1  | 60 | 60 | 86.1 | 1.30E-24 | 2 |
|               | 386  | 443  | 386  | 443  | WRKY | 1  | 60 | 60 | 89.2 | 1.50E-25 |   |
| Sb09g023270.1 | 240  | 296  | 240  | 296  | WRKY | 1  | 60 | 60 | 88.3 | 2.80E-25 | 2 |
|               | 416  | 473  | 416  | 473  | WRKY | 1  | 60 | 60 | 86.7 | 8.90E-25 |   |
| Sb09g023500.1 | 128  | 189  | 128  | 189  | WRKY | 1  | 60 | 62 | 68.1 | 5.90E-19 | 1 |
| Sb09g026350.1 | 155  | 212  | 155  | 212  | WRKY | 1  | 60 | 60 | 91.1 | 3.60E-26 | 1 |
| Sb09g026830.1 | 133  | 189  | 133  | 190  | WRKY | 1  | 59 | 59 | 87.5 | 4.90E-25 | 1 |
| Sb09g028660.1 | 194  | 251  | 194  | 251  | WRKY | 1  | 60 | 60 | 91.3 | 3.10E-26 | 1 |
| Sb09g028750.1 | 329  | 387  | 329  | 387  | WRKY | 1  | 60 | 60 | 91.9 | 2.10E-26 | 1 |
| Sb09g029050.1 | 111  | 170  | 111  | 171  | WRKY | 1  | 59 | 61 | 83.4 | 9.30E-24 | 1 |
| Sb09g029810.1 | 195  | 252  | 195  | 252  | WRKY | 1  | 60 | 60 | 91.5 | 2.90E-26 | 1 |
| Sb09g029850.1 | 162  | 218  | 161  | 219  | WRKY | 2  | 59 | 58 | 74.5 | 5.50E-21 | 1 |
| Sb10g004000.1 | 131  | 191  | 131  | 191  | WRKY | 1  | 60 | 62 | 88.8 | 1.90E-25 | 1 |
| Sb10g019923.1 | 85   | 141  | 84   | 141  | WRKY | 2  | 60 | 59 | 75.2 | 3.60E-21 | 1 |
| Sb10g020010.1 | 149  | 206  | 148  | 206  | WRKY | 2  | 60 | 59 | 83.1 | 1.20E-23 | 1 |
| Sb10g025590.1 | 191  | 248  | 191  | 249  | WRKY | 1  | 59 | 59 | 88.5 | 2.30E-25 | 1 |
| Sb10g025600.1 | 189  | 246  | 189  | 247  | WRKY | 1  | 59 | 59 | 88.6 | 2.30E-25 | 1 |

**Eudicots**

*Populus\_trichocarpa* (122 WRKYs)

|                    |     |     |     |     |      |    |    |    |      |          |   |
|--------------------|-----|-----|-----|-----|------|----|----|----|------|----------|---|
| POPTR_0001s00350.1 | 244 | 300 | 243 | 301 | WRKY | 2  | 59 | 58 | 89.4 | 1.30E-25 | 1 |
| POPTR_0001s03620.1 | 164 | 222 | 164 | 222 | WRKY | 1  | 60 | 60 | 85.6 | 2.00E-24 | 1 |
| POPTR_0001s03970.1 | 36  | 90  | 36  | 91  | WRKY | 1  | 59 | 59 | 70.5 | 1.00E-19 | 1 |
| POPTR_0001s09900.1 | 158 | 214 | 157 | 215 | WRKY | 2  | 59 | 58 | 88.3 | 2.80E-25 | 1 |
| POPTR_0001s10490.1 | 131 | 190 | 131 | 191 | WRKY | 1  | 59 | 61 | 92.7 | 1.20E-26 | 1 |
| POPTR_0001s13600.1 | 84  | 104 | 84  | 104 | WRKY | 1  | 21 | 21 | 32.1 | 1.00E-07 | 1 |
| POPTR_0001s13610.1 | 28  | 66  | 20  | 66  | WRKY | 20 | 60 | 41 | 52.1 | 5.60E-14 | 1 |
| POPTR_0001s21580.1 | 263 | 317 | 263 | 317 | WRKY | 1  | 60 | 60 | 75.5 | 2.70E-21 | 1 |
| POPTR_0001s33560.1 | 107 | 164 | 107 | 164 | WRKY | 1  | 60 | 60 | 93.2 | 8.40E-27 | 1 |
| POPTR_0001s34520.1 | 170 | 227 | 170 | 227 | WRKY | 1  | 60 | 60 | 92.9 | 1.00E-26 | 1 |
| POPTR_0001s37260.1 | 213 | 269 | 213 | 269 | WRKY | 1  | 60 | 60 | 85.9 | 1.60E-24 | 2 |
|                    | 378 | 435 | 378 | 435 | WRKY | 1  | 60 | 60 | 91.3 | 3.30E-26 |   |
| POPTR_0001s46490.1 | 209 | 266 | 208 | 266 | WRKY | 2  | 60 | 59 | 89.9 | 8.70E-26 | 1 |
| POPTR_0001s47670.1 | 313 | 367 | 311 | 367 | WRKY | 3  | 60 | 58 | 73.1 | 1.60E-20 | 2 |
|                    | 523 | 580 | 523 | 580 | WRKY | 1  | 60 | 60 | 87.1 | 6.60E-25 |   |
| POPTR_0001s47670.2 | 313 | 367 | 311 | 367 | WRKY | 3  | 60 | 58 | 73.1 | 1.50E-20 | 2 |
|                    | 523 | 580 | 523 | 580 | WRKY | 1  | 60 | 60 | 85.2 | 2.60E-24 |   |
| POPTR_0002s04440.1 | 285 | 342 | 284 | 342 | WRKY | 2  | 60 | 59 | 95.9 | 1.20E-27 | 1 |
| POPTR_0002s06000.1 | 182 | 239 | 182 | 239 | WRKY | 1  | 60 | 60 | 90.9 | 4.40E-26 | 1 |
| POPTR_0002s12480.1 | 286 | 342 | 285 | 343 | WRKY | 2  | 59 | 58 | 92.4 | 1.50E-26 | 1 |

|                    |     |     |     |     |      |    |    |    |      |          |   |
|--------------------|-----|-----|-----|-----|------|----|----|----|------|----------|---|
| POPTR_0002s13980.1 | 130 | 186 | 130 | 187 | WRKY | 1  | 59 | 59 | 88.5 | 2.50E-25 | 1 |
| POPTR_0002s16590.1 | 225 | 282 | 224 | 282 | WRKY | 2  | 60 | 59 | 88.3 | 2.80E-25 | 1 |
| POPTR_0002s16590.2 | 197 | 254 | 196 | 254 | WRKY | 2  | 60 | 59 | 88.5 | 2.40E-25 | 1 |
| POPTR_0002s16640.1 | 47  | 104 | 47  | 104 | WRKY | 1  | 60 | 60 | 90.7 | 4.80E-26 | 1 |
| POPTR_0002s17010.1 | 129 | 189 | 129 | 189 | WRKY | 1  | 60 | 62 | 91   | 4.00E-26 | 1 |
| POPTR_0002s18770.1 | 267 | 324 | 266 | 324 | WRKY | 2  | 60 | 59 | 91.8 | 2.30E-26 | 1 |
| POPTR_0002s19390.1 | 159 | 216 | 159 | 216 | WRKY | 1  | 60 | 60 | 93   | 9.20E-27 | 1 |
| POPTR_0002s19630.1 | 53  | 110 | 52  | 110 | WRKY | 2  | 60 | 59 | 87.9 | 3.60E-25 | 1 |
| POPTR_0002s21330.1 | 340 | 393 | 339 | 393 | WRKY | 2  | 60 | 59 | 72   | 3.40E-20 | 1 |
| POPTR_0002s22180.1 | 104 | 160 | 104 | 160 | WRKY | 1  | 60 | 60 | 80.3 | 8.70E-23 | 2 |
|                    | 219 | 275 | 219 | 276 | WRKY | 1  | 59 | 59 | 90.2 | 7.40E-26 |   |
| POPTR_0003s11120.1 | 240 | 296 | 239 | 297 | WRKY | 2  | 59 | 58 | 93.5 | 6.40E-27 | 1 |
| POPTR_0003s13250.1 | 154 | 210 | 153 | 211 | WRKY | 2  | 59 | 58 | 84   | 5.90E-24 | 1 |
| POPTR_0003s13840.1 | 131 | 190 | 131 | 191 | WRKY | 1  | 59 | 61 | 94.5 | 3.30E-27 | 1 |
| POPTR_0003s16750.1 | 81  | 138 | 81  | 138 | WRKY | 1  | 60 | 60 | 91.5 | 2.70E-26 | 1 |
| POPTR_0003s18060.1 | 165 | 220 | 165 | 220 | WRKY | 1  | 60 | 60 | 73.1 | 1.60E-20 | 1 |
| POPTR_0003s20860.1 | 25  | 79  | 25  | 80  | WRKY | 1  | 59 | 59 | 69.4 | 2.20E-19 | 1 |
| POPTR_0004s00890.1 | 318 | 375 | 317 | 375 | WRKY | 2  | 60 | 59 | 92.3 | 1.60E-26 | 1 |
| POPTR_0004s05920.1 | 76  | 133 | 75  | 133 | WRKY | 2  | 60 | 59 | 90.2 | 7.20E-26 | 1 |
| POPTR_0004s07050.1 | 195 | 253 | 195 | 253 | WRKY | 1  | 60 | 60 | 90.2 | 7.00E-26 | 1 |
| POPTR_0004s12000.1 | 209 | 265 | 209 | 265 | WRKY | 1  | 60 | 60 | 89.8 | 9.40E-26 | 2 |
|                    | 369 | 426 | 369 | 426 | WRKY | 1  | 60 | 60 | 92.1 | 1.80E-26 |   |
| POPTR_0005s05700.1 | 286 | 342 | 285 | 343 | WRKY | 2  | 59 | 58 | 92.2 | 1.80E-26 | 1 |
| POPTR_0005s08720.1 | 115 | 172 | 115 | 172 | WRKY | 1  | 60 | 60 | 81   | 5.40E-23 | 1 |
| POPTR_0005s08860.1 | 145 | 164 | 145 | 164 | WRKY | 1  | 20 | 20 | 26.9 | 4.10E-06 | 1 |
| POPTR_0005s08870.1 | 18  | 56  | 9   | 57  | WRKY | 19 | 59 | 41 | 54.2 | 1.30E-14 | 1 |
| POPTR_0005s18490.1 | 260 | 316 | 259 | 317 | WRKY | 2  | 59 | 58 | 92.9 | 9.90E-27 | 1 |
| POPTR_0005s22480.1 | 184 | 241 | 184 | 241 | WRKY | 1  | 60 | 60 | 91.7 | 2.30E-26 | 1 |
| POPTR_0005s24100.1 | 281 | 338 | 280 | 338 | WRKY | 2  | 60 | 59 | 95.9 | 1.10E-27 | 1 |
| POPTR_0006s07170.1 | 223 | 279 | 222 | 280 | WRKY | 2  | 59 | 58 | 91.1 | 3.80E-26 | 1 |
| POPTR_0006s08730.1 | 115 | 171 | 115 | 172 | WRKY | 1  | 59 | 59 | 88.6 | 2.20E-25 | 1 |
| POPTR_0006s10600.1 | 268 | 323 | 268 | 324 | WRKY | 1  | 59 | 59 | 85   | 3.00E-24 | 2 |
|                    | 430 | 487 | 430 | 487 | WRKY | 1  | 60 | 60 | 88.2 | 3.00E-25 |   |
| POPTR_0006s10950.1 | 133 | 193 | 133 | 193 | WRKY | 1  | 60 | 62 | 82.8 | 1.50E-23 | 1 |
| POPTR_0006s13550.1 | 196 | 250 | 195 | 251 | WRKY | 2  | 59 | 58 | 87.9 | 3.70E-25 | 2 |
|                    | 395 | 451 | 394 | 451 | WRKY | 2  | 60 | 59 | 89.6 | 1.10E-25 |   |
| POPTR_0006s19850.1 | 96  | 151 | 95  | 151 | WRKY | 2  | 60 | 59 | 61.6 | 6.00E-17 | 2 |
|                    | 282 | 304 | 281 | 307 | WRKY | 2  | 24 | 23 | 34.9 | 1.40E-08 |   |
| POPTR_0006s24050.1 | 105 | 162 | 105 | 162 | WRKY | 1  | 60 | 60 | 87.8 | 4.00E-25 | 1 |
| POPTR_0006s27950.1 | 165 | 221 | 164 | 222 | WRKY | 2  | 59 | 58 | 83.6 | 8.30E-24 | 1 |
| POPTR_0006s27990.1 | 32  | 88  | 31  | 88  | WRKY | 2  | 60 | 59 | 74   | 7.90E-21 | 2 |
|                    | 120 | 176 | 120 | 177 | WRKY | 1  | 59 | 59 | 85.3 | 2.50E-24 |   |
| POPTR_0007s06720.1 | 101 | 158 | 101 | 158 | WRKY | 1  | 60 | 60 | 78   | 4.50E-22 | 1 |
| POPTR_0007s06930.1 | 157 | 213 | 157 | 214 | WRKY | 1  | 59 | 59 | 88.8 | 2.00E-25 | 1 |
| POPTR_0007s06930.2 | 157 | 213 | 157 | 214 | WRKY | 1  | 59 | 59 | 88.8 | 2.00E-25 | 1 |
| POPTR_0007s10670.1 | 264 | 320 | 263 | 321 | WRKY | 2  | 59 | 58 | 93.4 | 7.10E-27 | 1 |
| POPTR_0007s10670.2 | 263 | 319 | 262 | 320 | WRKY | 2  | 59 | 58 | 93.4 | 7.00E-27 | 1 |
| POPTR_0008s09140.1 | 222 | 278 | 222 | 278 | WRKY | 1  | 60 | 60 | 92.3 | 1.60E-26 | 2 |
|                    | 391 | 448 | 391 | 448 | WRKY | 1  | 60 | 60 | 89.1 | 1.50E-25 |   |

|                    |     |     |     |     |      |    |    |    |      |          |   |
|--------------------|-----|-----|-----|-----|------|----|----|----|------|----------|---|
| POPTR_0008s09360.1 | 154 | 211 | 154 | 211 | WRKY | 1  | 60 | 60 | 90   | 8.00E-26 | 1 |
| POPTR_0008s10280.1 | 216 | 273 | 216 | 273 | WRKY | 1  | 60 | 60 | 94.4 | 3.50E-27 | 1 |
| POPTR_0010s15750.1 | 223 | 280 | 223 | 280 | WRKY | 1  | 60 | 60 | 92.3 | 1.60E-26 | 1 |
| POPTR_0010s16760.1 | 154 | 211 | 154 | 211 | WRKY | 1  | 60 | 60 | 89.8 | 9.70E-26 | 1 |
| POPTR_0010s17040.1 | 223 | 279 | 223 | 279 | WRKY | 1  | 60 | 60 | 90.2 | 7.30E-26 | 2 |
|                    | 394 | 451 | 394 | 451 | WRKY | 1  | 60 | 60 | 91.3 | 3.30E-26 |   |
| POPTR_0011s02790.1 | 185 | 242 | 185 | 242 | WRKY | 1  | 60 | 60 | 91.3 | 3.20E-26 | 1 |
| POPTR_0011s06990.1 | 76  | 133 | 75  | 133 | WRKY | 2  | 60 | 59 | 89.8 | 9.30E-26 | 1 |
| POPTR_0011s09030.1 | 209 | 265 | 209 | 265 | WRKY | 1  | 60 | 60 | 82.9 | 1.30E-23 | 2 |
|                    | 376 | 395 | 376 | 395 | WRKY | 1  | 20 | 20 | 25.2 | 1.40E-05 |   |
| POPTR_0011s16050.1 | 231 | 288 | 230 | 288 | WRKY | 2  | 60 | 59 | 90.3 | 6.80E-26 | 1 |
| POPTR_0011s17230.1 | 310 | 366 | 310 | 366 | WRKY | 1  | 60 | 60 | 85.7 | 1.90E-24 | 2 |
|                    | 522 | 579 | 522 | 579 | WRKY | 1  | 60 | 60 | 87.1 | 6.50E-25 |   |
| POPTR_0012s01380.1 | 134 | 193 | 134 | 194 | WRKY | 1  | 59 | 61 | 94.2 | 4.20E-27 | 1 |
| POPTR_0012s10290.1 | 100 | 157 | 100 | 157 | WRKY | 1  | 60 | 60 | 95.9 | 1.20E-27 | 1 |
| POPTR_0013s03990.1 | 287 | 343 | 286 | 344 | WRKY | 2  | 59 | 58 | 94.6 | 3.10E-27 | 1 |
| POPTR_0013s08380.1 | 156 | 212 | 156 | 212 | WRKY | 1  | 60 | 60 | 82.4 | 1.90E-23 | 2 |
|                    | 278 | 335 | 278 | 335 | WRKY | 1  | 60 | 60 | 88.7 | 2.10E-25 |   |
| POPTR_0013s09460.1 | 173 | 233 | 173 | 233 | WRKY | 1  | 60 | 62 | 87.2 | 6.40E-25 | 1 |
| POPTR_0013s09470.1 | 132 | 192 | 132 | 192 | WRKY | 1  | 60 | 62 | 79.9 | 1.20E-22 | 1 |
| POPTR_0013s10780.1 | 9   | 48  | 6   | 48  | WRKY | 20 | 60 | 41 | 51   | 1.20E-13 | 1 |
| POPTR_0013s14960.1 | 258 | 314 | 258 | 314 | WRKY | 1  | 60 | 60 | 89.2 | 1.50E-25 | 2 |
|                    | 431 | 488 | 431 | 488 | WRKY | 1  | 60 | 60 | 90.1 | 7.90E-26 |   |
| POPTR_0014s00690.1 | 28  | 58  | 23  | 59  | WRKY | 28 | 59 | 32 | 27.5 | 2.80E-06 | 1 |
| POPTR_0014s02420.1 | 316 | 372 | 315 | 373 | WRKY | 2  | 59 | 58 | 92.2 | 1.60E-26 | 1 |
| POPTR_0014s04890.1 | 155 | 175 | 155 | 175 | WRKY | 1  | 21 | 21 | 29.7 | 5.70E-07 | 1 |
| POPTR_0014s04900.1 | 13  | 50  | 5   | 51  | WRKY | 20 | 59 | 40 | 50.4 | 1.90E-13 | 1 |
| POPTR_0014s08600.1 | 165 | 222 | 164 | 222 | WRKY | 2  | 60 | 59 | 88.6 | 2.20E-25 | 1 |
| POPTR_0014s08600.2 | 154 | 211 | 153 | 211 | WRKY | 2  | 60 | 59 | 88.8 | 2.00E-25 | 1 |
| POPTR_0014s08640.1 | 39  | 96  | 39  | 96  | WRKY | 1  | 60 | 60 | 92.5 | 1.40E-26 | 1 |
| POPTR_0014s09190.1 | 129 | 188 | 129 | 189 | WRKY | 1  | 59 | 61 | 93.4 | 7.20E-27 | 1 |
| POPTR_0014s10750.1 | 267 | 324 | 266 | 324 | WRKY | 2  | 60 | 59 | 92.5 | 1.30E-26 | 1 |
| POPTR_0014s11350.1 | 158 | 215 | 158 | 215 | WRKY | 1  | 60 | 60 | 93.3 | 7.90E-27 | 1 |
| POPTR_0014s11490.1 | 53  | 110 | 52  | 110 | WRKY | 2  | 60 | 59 | 87.5 | 4.80E-25 | 1 |
| POPTR_0014s15320.1 | 352 | 409 | 351 | 409 | WRKY | 2  | 60 | 59 | 93.2 | 8.30E-27 | 1 |
| POPTR_0014s16220.1 | 106 | 162 | 106 | 162 | WRKY | 1  | 60 | 60 | 79.2 | 2.00E-22 | 2 |
|                    | 276 | 331 | 275 | 332 | WRKY | 2  | 59 | 58 | 90.2 | 7.20E-26 |   |
| POPTR_0014s16220.2 | 106 | 162 | 106 | 162 | WRKY | 1  | 60 | 60 | 79.2 | 2.00E-22 | 2 |
|                    | 276 | 331 | 275 | 332 | WRKY | 2  | 59 | 58 | 90.2 | 7.20E-26 |   |
| POPTR_0014s16220.3 | 106 | 162 | 106 | 162 | WRKY | 1  | 60 | 60 | 79.2 | 2.00E-22 | 2 |
|                    | 276 | 331 | 275 | 332 | WRKY | 2  | 59 | 58 | 90.2 | 7.20E-26 |   |
| POPTR_0014s16220.4 | 7   | 63  | 7   | 63  | WRKY | 1  | 60 | 60 | 79.6 | 1.40E-22 | 2 |
|                    | 177 | 232 | 176 | 233 | WRKY | 2  | 59 | 58 | 90.7 | 5.10E-26 |   |
| POPTR_0014s16220.5 | 106 | 162 | 106 | 162 | WRKY | 1  | 60 | 60 | 79.2 | 2.00E-22 | 2 |
|                    | 276 | 331 | 275 | 332 | WRKY | 2  | 59 | 58 | 90.2 | 7.20E-26 |   |
| POPTR_0015s07530.1 | 209 | 267 | 209 | 267 | WRKY | 1  | 60 | 60 | 92.8 | 1.10E-26 | 1 |
| POPTR_0015s11130.1 | 100 | 157 | 100 | 157 | WRKY | 1  | 60 | 60 | 93.8 | 5.40E-27 | 1 |
| POPTR_0015s11130.2 | 100 | 122 | 100 | 125 | WRKY | 1  | 23 | 23 | 34.7 | 1.50E-08 | 1 |
| POPTR_0016s08440.1 | 187 | 241 | 186 | 242 | WRKY | 2  | 59 | 58 | 88.4 | 2.70E-25 | 2 |

|                    |     |     |     |     |      |    |    |    |      |          |   |
|--------------------|-----|-----|-----|-----|------|----|----|----|------|----------|---|
|                    | 302 | 358 | 301 | 358 | WRKY | 2  | 60 | 59 | 90.7 | 5.00E-26 |   |
| POPTR_0016s08440.2 | 187 | 241 | 186 | 242 | WRKY | 2  | 59 | 58 | 88.4 | 2.70E-25 | 2 |
|                    | 302 | 358 | 301 | 358 | WRKY | 2  | 60 | 59 | 90.7 | 5.00E-26 |   |
| POPTR_0016s10610.1 | 119 | 174 | 118 | 175 | WRKY | 2  | 59 | 58 | 88.7 | 2.20E-25 | 1 |
| POPTR_0016s13600.1 | 249 | 305 | 249 | 305 | WRKY | 1  | 60 | 60 | 89.4 | 1.20E-25 | 2 |
|                    | 410 | 467 | 410 | 467 | WRKY | 1  | 60 | 60 | 89.3 | 1.30E-25 |   |
| POPTR_0016s14490.1 | 130 | 190 | 130 | 190 | WRKY | 1  | 60 | 62 | 80.8 | 6.20E-23 | 1 |
| POPTR_0017s00960.1 | 222 | 280 | 222 | 280 | WRKY | 1  | 60 | 60 | 90.6 | 5.50E-26 | 1 |
| POPTR_0017s09750.1 | 108 | 165 | 108 | 165 | WRKY | 1  | 60 | 60 | 91.6 | 2.60E-26 | 1 |
| POPTR_0017s11570.1 | 208 | 266 | 208 | 266 | WRKY | 1  | 60 | 60 | 90.9 | 4.20E-26 | 1 |
| POPTR_0017s12420.1 | 1   | 37  | 1   | 37  | WRKY | 22 | 60 | 39 | 46.6 | 3.00E-12 | 1 |
| POPTR_0017s12430.1 | 240 | 295 | 239 | 295 | WRKY | 2  | 60 | 59 | 90.2 | 6.90E-26 | 2 |
|                    | 412 | 434 | 412 | 446 | WRKY | 1  | 23 | 23 | 32.9 | 5.50E-08 |   |
| POPTR_0018s02470.1 | 165 | 222 | 165 | 223 | WRKY | 1  | 59 | 59 | 88.2 | 3.00E-25 | 1 |
| POPTR_0018s02470.2 | 163 | 220 | 163 | 221 | WRKY | 1  | 59 | 59 | 88.2 | 3.00E-25 | 1 |
| POPTR_0018s02480.1 | 103 | 161 | 103 | 161 | WRKY | 1  | 60 | 60 | 82.7 | 1.50E-23 | 1 |
| POPTR_0018s02550.1 | 83  | 138 | 82  | 139 | WRKY | 2  | 59 | 58 | 73   | 1.70E-20 | 1 |
| POPTR_0018s03450.1 | 256 | 312 | 255 | 313 | WRKY | 2  | 59 | 58 | 92.6 | 1.30E-26 | 1 |
| POPTR_0018s11620.1 | 1   | 37  | 1   | 37  | WRKY | 22 | 60 | 39 | 38.3 | 1.20E-09 | 1 |
| POPTR_0018s11630.1 | 216 | 270 | 215 | 271 | WRKY | 2  | 59 | 58 | 58   | 8.30E-16 | 2 |
|                    | 388 | 410 | 387 | 419 | WRKY | 2  | 24 | 23 | 31.9 | 1.20E-07 |   |
| POPTR_0018s11630.2 | 209 | 263 | 208 | 264 | WRKY | 2  | 59 | 58 | 58   | 8.10E-16 | 2 |
|                    | 381 | 403 | 380 | 412 | WRKY | 2  | 24 | 23 | 31.9 | 1.10E-07 |   |
| POPTR_0018s11630.3 | 212 | 266 | 211 | 267 | WRKY | 2  | 59 | 58 | 58   | 8.20E-16 | 2 |
|                    | 384 | 406 | 383 | 415 | WRKY | 2  | 24 | 23 | 31.9 | 1.20E-07 |   |
| POPTR_0018s13600.1 | 222 | 278 | 221 | 279 | WRKY | 2  | 59 | 58 | 91.5 | 2.90E-26 | 1 |
| POPTR_0019s08110.1 | 264 | 320 | 264 | 320 | WRKY | 1  | 60 | 60 | 80.7 | 6.80E-23 | 2 |
|                    | 431 | 488 | 431 | 488 | WRKY | 1  | 60 | 60 | 82.3 | 2.20E-23 |   |
| POPTR_0019s08730.1 | 183 | 243 | 183 | 243 | WRKY | 1  | 60 | 62 | 89   | 1.70E-25 | 1 |
| POPTR_0019s14460.1 | 258 | 314 | 258 | 314 | WRKY | 1  | 60 | 60 | 83.7 | 7.80E-24 | 2 |
|                    | 433 | 490 | 433 | 490 | WRKY | 1  | 60 | 60 | 90.1 | 7.40E-26 |   |
| POPTR_0021s00280.1 | 335 | 392 | 334 | 392 | WRKY | 2  | 60 | 59 | 91.6 | 2.60E-26 | 1 |
| POPTR_0810s00200.1 | 185 | 242 | 185 | 242 | WRKY | 1  | 60 | 60 | 91.4 | 3.00E-26 | 1 |

***Cucumis sativu* (88 WRKYs)**

|                |     |     |     |     |      |   |    |    |      |          |   |
|----------------|-----|-----|-----|-----|------|---|----|----|------|----------|---|
| Cucsa.000200.1 | 8   | 66  | 8   | 66  | WRKY | 1 | 60 | 60 | 91.9 | 2.10E-26 | 2 |
|                | 161 | 218 | 161 | 218 | WRKY | 1 | 60 | 60 | 83.7 | 7.60E-24 |   |
| Cucsa.012940.1 | 143 | 202 | 143 | 203 | WRKY | 1 | 59 | 61 | 93.1 | 9.00E-27 | 1 |
| Cucsa.041700.1 | 331 | 387 | 331 | 387 | WRKY | 1 | 60 | 60 | 87   | 7.30E-25 | 2 |
|                | 546 | 603 | 546 | 603 | WRKY | 1 | 60 | 60 | 86.8 | 8.40E-25 |   |
| Cucsa.041700.2 | 331 | 387 | 331 | 387 | WRKY | 1 | 60 | 60 | 87   | 7.20E-25 | 2 |
|                | 546 | 603 | 546 | 603 | WRKY | 1 | 60 | 60 | 86.8 | 8.30E-25 |   |
| Cucsa.042320.1 | 210 | 266 | 210 | 266 | WRKY | 1 | 60 | 60 | 85.4 | 2.30E-24 | 2 |
|                | 386 | 443 | 386 | 443 | WRKY | 1 | 60 | 60 | 90   | 8.50E-26 |   |
| Cucsa.042330.2 | 138 | 194 | 138 | 194 | WRKY | 1 | 60 | 60 | 85.7 | 1.90E-24 | 2 |
|                | 314 | 371 | 314 | 371 | WRKY | 1 | 60 | 60 | 90.2 | 6.90E-26 |   |
| Cucsa.042340.3 | 138 | 194 | 138 | 194 | WRKY | 1 | 60 | 60 | 85.7 | 1.90E-24 | 2 |
|                | 314 | 371 | 314 | 371 | WRKY | 1 | 60 | 60 | 90.2 | 6.90E-26 |   |
| Cucsa.042350.4 | 210 | 266 | 210 | 266 | WRKY | 1 | 60 | 60 | 86.2 | 1.20E-24 | 1 |
| Cucsa.045040.1 | 353 | 410 | 352 | 410 | WRKY | 2 | 60 | 59 | 91.9 | 2.10E-26 | 1 |

|                |     |     |     |     |      |    |    |    |      |          |   |
|----------------|-----|-----|-----|-----|------|----|----|----|------|----------|---|
| Cucsa.047510.1 | 116 | 172 | 116 | 173 | WRKY | 1  | 59 | 59 | 91   | 4.10E-26 | 1 |
| Cucsa.048520.1 | 261 | 318 | 260 | 318 | WRKY | 2  | 60 | 59 | 89.5 | 1.20E-25 | 1 |
| Cucsa.049620.1 | 177 | 235 | 177 | 235 | WRKY | 1  | 60 | 60 | 94.6 | 3.00E-27 | 1 |
| Cucsa.054040.1 | 91  | 147 | 91  | 148 | WRKY | 1  | 59 | 59 | 92.4 | 1.50E-26 | 1 |
| Cucsa.056150.1 | 21  | 56  | 15  | 56  | WRKY | 19 | 56 | 38 | 37.9 | 1.50E-09 | 1 |
| Cucsa.066300.1 | 159 | 215 | 159 | 216 | WRKY | 1  | 59 | 59 | 90.2 | 7.30E-26 | 1 |
| Cucsa.073190.1 | 223 | 279 | 222 | 280 | WRKY | 2  | 59 | 58 | 95.4 | 1.70E-27 | 1 |
| Cucsa.073190.2 | 222 | 278 | 221 | 279 | WRKY | 2  | 59 | 58 | 95.4 | 1.70E-27 | 1 |
| Cucsa.078810.1 | 102 | 160 | 101 | 161 | WRKY | 2  | 59 | 60 | 90.7 | 5.00E-26 | 1 |
| Cucsa.087850.1 | 50  | 107 | 50  | 107 | WRKY | 1  | 60 | 60 | 90.3 | 6.50E-26 | 1 |
| Cucsa.093390.1 | 195 | 250 | 194 | 250 | WRKY | 2  | 60 | 59 | 63.8 | 1.20E-17 | 2 |
|                | 369 | 424 | 368 | 425 | WRKY | 2  | 59 | 58 | 83.8 | 7.00E-24 |   |
| Cucsa.093390.2 | 194 | 249 | 193 | 249 | WRKY | 2  | 60 | 59 | 63.8 | 1.20E-17 | 2 |
|                | 368 | 423 | 367 | 424 | WRKY | 2  | 59 | 58 | 83.8 | 7.00E-24 |   |
| Cucsa.095090.1 | 136 | 193 | 136 | 193 | WRKY | 1  | 60 | 60 | 91   | 3.90E-26 | 1 |
| Cucsa.095090.2 | 136 | 192 | 136 | 192 | WRKY | 1  | 60 | 60 | 80.6 | 7.00E-23 | 1 |
| Cucsa.096680.1 | 54  | 111 | 53  | 111 | WRKY | 2  | 60 | 59 | 88.7 | 2.00E-25 | 1 |
| Cucsa.096680.2 | 54  | 107 | 53  | 107 | WRKY | 2  | 60 | 59 | 67.6 | 8.40E-19 | 1 |
| Cucsa.096680.3 | 9   | 66  | 8   | 66  | WRKY | 2  | 60 | 59 | 89.2 | 1.50E-25 | 1 |
| Cucsa.097890.1 | 182 | 240 | 182 | 240 | WRKY | 1  | 60 | 60 | 92.5 | 1.40E-26 | 1 |
| Cucsa.100440.1 | 112 | 168 | 112 | 168 | WRKY | 1  | 60 | 60 | 80.3 | 8.90E-23 | 2 |
|                | 286 | 342 | 286 | 343 | WRKY | 1  | 59 | 59 | 92.2 | 1.70E-26 |   |
| Cucsa.100440.2 | 112 | 168 | 112 | 168 | WRKY | 1  | 60 | 60 | 80.3 | 8.90E-23 | 2 |
|                | 286 | 342 | 286 | 343 | WRKY | 1  | 59 | 59 | 92.2 | 1.70E-26 |   |
| Cucsa.100440.3 | 112 | 168 | 112 | 168 | WRKY | 1  | 60 | 60 | 80.3 | 8.90E-23 | 2 |
|                | 286 | 342 | 286 | 343 | WRKY | 1  | 59 | 59 | 92.2 | 1.70E-26 |   |
| Cucsa.100440.4 | 112 | 168 | 112 | 168 | WRKY | 1  | 60 | 60 | 80.6 | 7.20E-23 | 2 |
|                | 286 | 342 | 286 | 343 | WRKY | 1  | 59 | 59 | 92.5 | 1.30E-26 |   |
| Cucsa.101460.1 | 163 | 219 | 163 | 220 | WRKY | 1  | 59 | 59 | 90.1 | 7.50E-26 | 1 |
| Cucsa.101530.1 | 84  | 141 | 84  | 141 | WRKY | 1  | 60 | 60 | 84   | 6.10E-24 | 1 |
| Cucsa.102600.1 | 223 | 279 | 222 | 280 | WRKY | 2  | 59 | 58 | 93.9 | 4.90E-27 | 1 |
| Cucsa.106960.1 | 140 | 196 | 139 | 197 | WRKY | 2  | 59 | 58 | 91.1 | 3.80E-26 | 1 |
| Cucsa.106970.1 | 122 | 179 | 122 | 179 | WRKY | 1  | 60 | 60 | 87.5 | 5.10E-25 | 1 |
| Cucsa.106970.2 | 122 | 175 | 122 | 175 | WRKY | 1  | 60 | 60 | 64.9 | 5.80E-18 | 1 |
| Cucsa.107310.1 | 131 | 190 | 131 | 191 | WRKY | 1  | 59 | 61 | 90.9 | 4.20E-26 | 1 |
| Cucsa.111910.1 | 233 | 289 | 233 | 289 | WRKY | 1  | 60 | 60 | 89.2 | 1.40E-25 | 2 |
|                | 408 | 465 | 408 | 465 | WRKY | 1  | 60 | 60 | 89.8 | 9.30E-26 |   |
| Cucsa.111910.2 | 233 | 289 | 233 | 289 | WRKY | 1  | 60 | 60 | 89.8 | 9.60E-26 | 2 |
|                | 408 | 428 | 408 | 428 | WRKY | 1  | 21 | 21 | 29   | 8.90E-07 |   |
| Cucsa.118200.1 | 79  | 135 | 79  | 136 | WRKY | 1  | 59 | 59 | 95.2 | 2.00E-27 | 1 |
| Cucsa.143830.1 | 121 | 183 | 121 | 183 | WRKY | 1  | 60 | 63 | 80.1 | 9.90E-23 | 1 |
| Cucsa.143830.2 | 120 | 182 | 120 | 182 | WRKY | 1  | 60 | 63 | 80.2 | 9.80E-23 | 1 |
| Cucsa.143840.1 | 159 | 219 | 159 | 219 | WRKY | 1  | 60 | 62 | 91   | 4.10E-26 | 1 |
| Cucsa.148640.1 | 197 | 254 | 196 | 254 | WRKY | 2  | 60 | 59 | 93   | 9.60E-27 | 1 |
| Cucsa.158040.1 | 233 | 289 | 233 | 289 | WRKY | 1  | 60 | 60 | 90.6 | 5.50E-26 | 2 |
|                | 393 | 450 | 393 | 450 | WRKY | 1  | 60 | 60 | 89   | 1.70E-25 |   |
| Cucsa.162810.1 | 146 | 204 | 146 | 204 | WRKY | 1  | 60 | 60 | 80.3 | 8.60E-23 | 1 |
| Cucsa.162820.1 | 90  | 146 | 90  | 147 | WRKY | 1  | 59 | 59 | 83.8 | 6.90E-24 | 1 |
| Cucsa.167500.1 | 198 | 255 | 197 | 255 | WRKY | 2  | 60 | 59 | 89.1 | 1.60E-25 | 1 |

|                |     |     |     |     |      |    |    |    |      |          |   |
|----------------|-----|-----|-----|-----|------|----|----|----|------|----------|---|
| Cucsa.168370.1 | 118 | 175 | 117 | 175 | WRKY | 2  | 60 | 59 | 96.7 | 6.70E-28 | 1 |
| Cucsa.176780.1 | 171 | 226 | 171 | 227 | WRKY | 1  | 59 | 59 | 87.9 | 3.80E-25 | 2 |
|                | 321 | 377 | 320 | 377 | WRKY | 2  | 60 | 59 | 88.2 | 3.00E-25 |   |
| Cucsa.176780.2 | 170 | 225 | 170 | 226 | WRKY | 1  | 59 | 59 | 87.9 | 3.80E-25 | 2 |
|                | 320 | 376 | 319 | 376 | WRKY | 2  | 60 | 59 | 88.2 | 2.90E-25 |   |
| Cucsa.177060.1 | 123 | 182 | 123 | 183 | WRKY | 1  | 59 | 61 | 85.5 | 2.10E-24 | 1 |
| Cucsa.177230.1 | 160 | 218 | 160 | 218 | WRKY | 1  | 60 | 60 | 85.8 | 1.70E-24 | 1 |
| Cucsa.177230.2 | 109 | 167 | 109 | 167 | WRKY | 1  | 60 | 60 | 86.2 | 1.30E-24 | 1 |
| Cucsa.195730.1 | 183 | 240 | 182 | 240 | WRKY | 2  | 60 | 59 | 86.4 | 1.10E-24 | 1 |
| Cucsa.197550.1 | 268 | 326 | 268 | 326 | WRKY | 1  | 60 | 60 | 91.9 | 2.20E-26 | 1 |
| Cucsa.197550.2 | 239 | 297 | 239 | 297 | WRKY | 1  | 60 | 60 | 92   | 2.00E-26 | 1 |
| Cucsa.201710.1 | 176 | 233 | 175 | 233 | WRKY | 2  | 60 | 59 | 91.1 | 3.80E-26 | 1 |
| Cucsa.204920.1 | 150 | 207 | 150 | 207 | WRKY | 1  | 60 | 60 | 91   | 4.00E-26 | 1 |
| Cucsa.212870.1 | 78  | 134 | 77  | 135 | WRKY | 2  | 59 | 58 | 85.9 | 1.60E-24 | 1 |
| Cucsa.239590.1 | 157 | 214 | 157 | 214 | WRKY | 1  | 60 | 60 | 89.5 | 1.20E-25 | 1 |
| Cucsa.247040.1 | 163 | 220 | 163 | 220 | WRKY | 1  | 60 | 60 | 95.5 | 1.50E-27 | 1 |
| Cucsa.250310.1 | 170 | 226 | 170 | 227 | WRKY | 1  | 59 | 59 | 85.8 | 1.70E-24 | 1 |
| Cucsa.250350.1 | 128 | 185 | 128 | 185 | WRKY | 1  | 60 | 60 | 83.4 | 9.80E-24 | 1 |
| Cucsa.250350.2 | 128 | 148 | 128 | 148 | WRKY | 1  | 21 | 21 | 27.6 | 2.50E-06 | 1 |
| Cucsa.252440.1 | 154 | 211 | 154 | 211 | WRKY | 1  | 60 | 60 | 89.7 | 1.00E-25 | 1 |
| Cucsa.258700.1 | 160 | 217 | 159 | 217 | WRKY | 2  | 60 | 59 | 89.9 | 8.90E-26 | 1 |
| Cucsa.258730.1 | 94  | 151 | 94  | 151 | WRKY | 1  | 60 | 60 | 86.9 | 7.60E-25 | 1 |
| Cucsa.259110.1 | 129 | 188 | 129 | 189 | WRKY | 1  | 59 | 61 | 92.1 | 1.80E-26 | 1 |
| Cucsa.260060.1 | 146 | 202 | 146 | 203 | WRKY | 1  | 59 | 59 | 88.1 | 3.20E-25 | 1 |
| Cucsa.271570.1 | 168 | 225 | 168 | 226 | WRKY | 1  | 59 | 59 | 84.1 | 5.70E-24 | 1 |
| Cucsa.282040.1 | 213 | 270 | 212 | 270 | WRKY | 2  | 60 | 59 | 92.9 | 1.00E-26 | 1 |
| Cucsa.284730.1 | 199 | 255 | 199 | 255 | WRKY | 1  | 60 | 60 | 91.4 | 3.00E-26 | 2 |
|                | 379 | 436 | 379 | 436 | WRKY | 1  | 60 | 60 | 91.6 | 2.60E-26 |   |
| Cucsa.300610.1 | 157 | 214 | 157 | 214 | WRKY | 1  | 60 | 60 | 91.7 | 2.40E-26 | 1 |
| Cucsa.300610.2 | 157 | 214 | 157 | 214 | WRKY | 1  | 60 | 60 | 91.8 | 2.20E-26 | 1 |
| Cucsa.300610.3 | 157 | 214 | 157 | 214 | WRKY | 1  | 60 | 60 | 92.1 | 1.90E-26 | 1 |
| Cucsa.300610.4 | 69  | 116 | 68  | 116 | WRKY | 11 | 60 | 50 | 47.5 | 1.50E-12 | 1 |
| Cucsa.307270.1 | 76  | 131 | 75  | 131 | WRKY | 2  | 60 | 59 | 89   | 1.70E-25 | 2 |
|                | 273 | 327 | 272 | 328 | WRKY | 3  | 59 | 57 | 80.6 | 7.10E-23 |   |
| Cucsa.307270.2 | 76  | 131 | 75  | 131 | WRKY | 2  | 60 | 59 | 89   | 1.70E-25 | 2 |
|                | 273 | 326 | 272 | 327 | WRKY | 3  | 59 | 57 | 70.2 | 1.30E-19 |   |
| Cucsa.311060.1 | 272 | 328 | 271 | 329 | WRKY | 2  | 59 | 58 | 92.2 | 1.80E-26 | 1 |
| Cucsa.327760.1 | 152 | 209 | 152 | 209 | WRKY | 1  | 60 | 60 | 85.9 | 1.60E-24 | 1 |
| Cucsa.352410.1 | 321 | 377 | 320 | 378 | WRKY | 2  | 59 | 58 | 91.1 | 3.70E-26 | 1 |
| Cucsa.352410.2 | 320 | 376 | 319 | 377 | WRKY | 2  | 59 | 58 | 91.1 | 3.60E-26 | 1 |
| Cucsa.352410.3 | 321 | 340 | 320 | 341 | WRKY | 2  | 21 | 20 | 27.9 | 2.00E-06 | 1 |
| Cucsa.356720.1 | 80  | 135 | 80  | 136 | WRKY | 1  | 59 | 59 | 87.7 | 4.30E-25 | 2 |
|                | 268 | 325 | 268 | 325 | WRKY | 1  | 60 | 60 | 86.2 | 1.30E-24 |   |
| Cucsa.388650.1 | 286 | 343 | 285 | 343 | WRKY | 2  | 60 | 59 | 94.6 | 2.90E-27 | 1 |
| Cucsa.388650.2 | 189 | 246 | 188 | 246 | WRKY | 2  | 60 | 59 | 95.4 | 1.70E-27 | 1 |

---

*Arabidopsis thaliana* (91 WRKYs)

---

|             |     |     |     |     |      |   |    |    |      |          |   |
|-------------|-----|-----|-----|-----|------|---|----|----|------|----------|---|
| AT1G13960.1 | 229 | 285 | 229 | 285 | WRKY | 1 | 60 | 60 | 91.9 | 2.10E-26 | 2 |
|             | 409 | 466 | 409 | 466 | WRKY | 1 | 60 | 60 | 90.4 | 6.10E-26 |   |
| AT1G13960.2 | 202 | 258 | 202 | 258 | WRKY | 1 | 60 | 60 | 92   | 2.00E-26 | 2 |

|             |     |     |     |     |      |    |    |    |      |          |   |
|-------------|-----|-----|-----|-----|------|----|----|----|------|----------|---|
|             | 382 | 439 | 382 | 439 | WRKY | 1  | 60 | 60 | 90.5 | 5.70E-26 |   |
| AT1G18860.1 | 191 | 249 | 191 | 249 | WRKY | 1  | 60 | 60 | 90.6 | 5.40E-26 | 1 |
| AT1G29280.1 | 75  | 132 | 74  | 132 | WRKY | 2  | 60 | 59 | 92.7 | 1.20E-26 | 1 |
| AT1G29860.1 | 136 | 193 | 136 | 193 | WRKY | 1  | 60 | 60 | 93   | 9.50E-27 | 1 |
| AT1G30650.1 | 218 | 275 | 217 | 275 | WRKY | 2  | 60 | 59 | 90.1 | 7.50E-26 | 1 |
| AT1G55600.1 | 307 | 364 | 307 | 364 | WRKY | 1  | 60 | 60 | 80.9 | 5.80E-23 | 1 |
| AT1G62300.1 | 313 | 370 | 312 | 370 | WRKY | 2  | 60 | 59 | 94   | 4.70E-27 | 1 |
| AT1G64000.1 | 114 | 171 | 114 | 171 | WRKY | 1  | 60 | 60 | 91.5 | 2.80E-26 | 1 |
| AT1G66550.1 | 108 | 168 | 108 | 168 | WRKY | 1  | 60 | 62 | 78.6 | 2.90E-22 | 1 |
| AT1G66550.2 | 103 | 163 | 103 | 163 | WRKY | 1  | 60 | 62 | 78.7 | 2.80E-22 | 1 |
| AT1G66560.1 | 103 | 163 | 103 | 163 | WRKY | 1  | 60 | 62 | 81.4 | 3.90E-23 | 1 |
| AT1G66600.1 | 103 | 163 | 103 | 163 | WRKY | 1  | 60 | 62 | 79.6 | 1.40E-22 | 1 |
| AT1G68150.1 | 235 | 293 | 235 | 293 | WRKY | 1  | 60 | 60 | 95.7 | 1.40E-27 | 1 |
| AT1G69310.1 | 147 | 204 | 147 | 204 | WRKY | 1  | 60 | 60 | 91.7 | 2.50E-26 | 1 |
| AT1G69310.2 | 147 | 204 | 147 | 204 | WRKY | 1  | 60 | 60 | 91.7 | 2.50E-26 | 1 |
| AT1G69810.1 | 203 | 262 | 203 | 262 | WRKY | 1  | 60 | 60 | 87.1 | 6.70E-25 | 1 |
| AT1G80590.1 | 86  | 145 | 85  | 145 | WRKY | 2  | 60 | 61 | 77   | 9.60E-22 | 1 |
| AT1G80840.1 | 146 | 204 | 146 | 204 | WRKY | 1  | 60 | 60 | 81.5 | 3.80E-23 | 1 |
| AT2G03340.1 | 250 | 306 | 250 | 306 | WRKY | 1  | 60 | 60 | 90.5 | 5.80E-26 | 2 |
|             | 415 | 472 | 415 | 472 | WRKY | 1  | 60 | 60 | 89   | 1.70E-25 |   |
| AT2G04880.1 | 111 | 167 | 111 | 167 | WRKY | 1  | 60 | 60 | 83.6 | 8.50E-24 | 2 |
|             | 307 | 363 | 307 | 364 | WRKY | 1  | 59 | 59 | 91.2 | 3.40E-26 |   |
| AT2G04880.2 | 111 | 167 | 111 | 167 | WRKY | 1  | 60 | 60 | 83.7 | 7.90E-24 | 2 |
|             | 283 | 339 | 283 | 340 | WRKY | 1  | 59 | 59 | 91.3 | 3.20E-26 |   |
| AT2G21900.1 | 109 | 166 | 109 | 166 | WRKY | 1  | 60 | 60 | 78.1 | 4.40E-22 | 1 |
| AT2G23320.1 | 241 | 297 | 240 | 298 | WRKY | 2  | 59 | 58 | 94.2 | 3.90E-27 | 1 |
| AT2G23320.2 | 241 | 260 | 240 | 262 | WRKY | 2  | 21 | 20 | 28.9 | 1.00E-06 | 1 |
| AT2G24570.1 | 244 | 301 | 243 | 301 | WRKY | 2  | 60 | 59 | 91.9 | 2.20E-26 | 1 |
| AT2G25000.1 | 146 | 203 | 146 | 204 | WRKY | 1  | 59 | 59 | 83.6 | 8.30E-24 | 1 |
| AT2G30250.1 | 166 | 222 | 166 | 222 | WRKY | 1  | 60 | 60 | 78.5 | 3.20E-22 | 2 |
|             | 329 | 385 | 328 | 385 | WRKY | 2  | 60 | 59 | 87.7 | 4.40E-25 |   |
| AT2G30590.1 | 314 | 371 | 313 | 371 | WRKY | 2  | 60 | 59 | 92   | 2.00E-26 | 1 |
| AT2G34830.1 | 216 | 273 | 215 | 273 | WRKY | 2  | 60 | 59 | 89.9 | 8.80E-26 | 1 |
| AT2G37260.1 | 166 | 220 | 165 | 221 | WRKY | 2  | 59 | 58 | 86.3 | 1.20E-24 | 2 |
|             | 349 | 406 | 349 | 406 | WRKY | 1  | 60 | 60 | 90.2 | 7.00E-26 |   |
| AT2G37260.2 | 84  | 138 | 83  | 139 | WRKY | 2  | 59 | 58 | 86.7 | 8.70E-25 | 2 |
|             | 267 | 324 | 267 | 324 | WRKY | 1  | 60 | 60 | 90.7 | 5.10E-26 |   |
| AT2G38470.1 | 184 | 240 | 184 | 240 | WRKY | 1  | 60 | 60 | 87.8 | 3.90E-25 | 2 |
|             | 362 | 419 | 362 | 419 | WRKY | 1  | 60 | 60 | 88.8 | 2.00E-25 |   |
| AT2G40740.1 | 173 | 232 | 173 | 233 | WRKY | 1  | 59 | 61 | 87.9 | 3.80E-25 | 1 |
| AT2G40740.2 | 146 | 188 | 139 | 189 | WRKY | 18 | 59 | 44 | 50.5 | 1.80E-13 | 1 |
| AT2G40750.1 | 152 | 211 | 152 | 212 | WRKY | 1  | 59 | 61 | 85.7 | 1.80E-24 | 1 |
| AT2G44745.1 | 145 | 201 | 145 | 202 | WRKY | 1  | 59 | 59 | 88.1 | 3.20E-25 | 1 |
| AT2G46130.1 | 30  | 87  | 30  | 87  | WRKY | 1  | 60 | 60 | 91.3 | 3.30E-26 | 1 |
| AT2G46130.2 | 18  | 71  | 18  | 71  | WRKY | 1  | 60 | 60 | 70.1 | 1.30E-19 | 1 |
| AT2G46400.1 | 104 | 163 | 104 | 164 | WRKY | 1  | 59 | 61 | 80.7 | 6.50E-23 | 1 |
| AT2G47260.1 | 174 | 230 | 174 | 231 | WRKY | 1  | 59 | 59 | 90.1 | 7.70E-26 | 1 |
| AT3G01080.1 | 167 | 222 | 167 | 223 | WRKY | 1  | 59 | 59 | 86.1 | 1.30E-24 | 2 |
|             | 306 | 363 | 306 | 363 | WRKY | 1  | 60 | 60 | 89.2 | 1.50E-25 |   |

|             |     |     |     |     |      |    |    |    |      |          |   |
|-------------|-----|-----|-----|-----|------|----|----|----|------|----------|---|
| AT3G01970.1 | 65  | 121 | 65  | 122 | WRKY | 1  | 59 | 59 | 88.5 | 2.40E-25 | 1 |
| AT3G04670.1 | 263 | 319 | 262 | 320 | WRKY | 2  | 59 | 58 | 92.5 | 1.40E-26 | 1 |
| AT3G04670.2 | 263 | 286 | 262 | 288 | WRKY | 2  | 25 | 24 | 34   | 2.60E-08 | 1 |
| AT3G32090.1 | 90  | 116 | 82  | 116 | WRKY | 33 | 60 | 28 | 21.4 | 0.00021  | 1 |
| AT3G56400.1 | 120 | 179 | 120 | 180 | WRKY | 1  | 59 | 61 | 85.4 | 2.30E-24 | 1 |
| AT3G58710.1 | 72  | 129 | 71  | 129 | WRKY | 2  | 60 | 59 | 86.4 | 1.10E-24 | 1 |
| AT3G58710.2 | 71  | 128 | 70  | 128 | WRKY | 2  | 60 | 59 | 86.4 | 1.10E-24 | 1 |
| AT3G62340.1 | 118 | 175 | 118 | 175 | WRKY | 1  | 60 | 60 | 86.7 | 9.10E-25 | 1 |
| AT4G01250.1 | 129 | 186 | 128 | 186 | WRKY | 2  | 60 | 59 | 90.2 | 7.00E-26 | 1 |
| AT4G01720.1 | 239 | 297 | 239 | 297 | WRKY | 1  | 60 | 60 | 92.3 | 1.50E-26 | 1 |
| AT4G04450.1 | 293 | 350 | 292 | 350 | WRKY | 2  | 60 | 59 | 92.2 | 1.70E-26 | 1 |
| AT4G11070.1 | 141 | 200 | 141 | 201 | WRKY | 1  | 59 | 61 | 89.7 | 1.10E-25 | 1 |
| AT4G11070.2 | 109 | 168 | 109 | 169 | WRKY | 1  | 59 | 61 | 89.9 | 8.80E-26 | 1 |
| AT4G12020.1 | 468 | 524 | 468 | 524 | WRKY | 1  | 60 | 60 | 75.7 | 2.40E-21 | 2 |
|             | 641 | 661 | 641 | 663 | WRKY | 1  | 21 | 21 | 28.7 | 1.10E-06 |   |
| AT4G12020.2 | 468 | 524 | 468 | 524 | WRKY | 1  | 60 | 60 | 75.6 | 2.60E-21 | 2 |
|             | 641 | 661 | 641 | 663 | WRKY | 1  | 21 | 21 | 28.6 | 1.20E-06 |   |
| AT4G12020.3 | 468 | 524 | 468 | 524 | WRKY | 1  | 60 | 60 | 75.6 | 2.60E-21 | 2 |
|             | 641 | 661 | 641 | 663 | WRKY | 1  | 21 | 21 | 28.6 | 1.20E-06 |   |
| AT4G18170.1 | 172 | 229 | 172 | 229 | WRKY | 1  | 60 | 60 | 92   | 2.00E-26 | 1 |
| AT4G22070.1 | 298 | 355 | 297 | 355 | WRKY | 2  | 60 | 59 | 93.4 | 7.30E-27 | 1 |
| AT4G23550.1 | 135 | 192 | 134 | 192 | WRKY | 2  | 60 | 59 | 89.2 | 1.50E-25 | 1 |
| AT4G23810.1 | 158 | 217 | 158 | 218 | WRKY | 1  | 59 | 61 | 89.6 | 1.10E-25 | 1 |
| AT4G24240.1 | 282 | 338 | 281 | 339 | WRKY | 2  | 59 | 58 | 90.5 | 5.80E-26 | 1 |
| AT4G26440.1 | 178 | 233 | 178 | 234 | WRKY | 1  | 59 | 59 | 84.8 | 3.50E-24 | 2 |
|             | 372 | 428 | 372 | 429 | WRKY | 1  | 59 | 59 | 84.6 | 3.90E-24 |   |
| AT4G26640.1 | 139 | 195 | 139 | 195 | WRKY | 1  | 60 | 60 | 85.6 | 2.00E-24 | 2 |
|             | 309 | 365 | 309 | 366 | WRKY | 1  | 59 | 59 | 88.5 | 2.40E-25 |   |
| AT4G26640.2 | 211 | 267 | 211 | 267 | WRKY | 1  | 60 | 60 | 85.3 | 2.40E-24 | 2 |
|             | 381 | 437 | 381 | 438 | WRKY | 1  | 59 | 59 | 88.3 | 2.90E-25 |   |
| AT4G30935.1 | 169 | 224 | 168 | 224 | WRKY | 2  | 60 | 59 | 62.2 | 3.90E-17 | 2 |
|             | 332 | 388 | 331 | 388 | WRKY | 2  | 60 | 59 | 83.7 | 7.80E-24 |   |
| AT4G31550.1 | 247 | 303 | 246 | 304 | WRKY | 2  | 59 | 58 | 93.3 | 7.60E-27 | 1 |
| AT4G31550.2 | 246 | 302 | 245 | 303 | WRKY | 2  | 59 | 58 | 93.3 | 7.60E-27 | 1 |
| AT4G31800.1 | 176 | 233 | 176 | 234 | WRKY | 1  | 59 | 59 | 84.2 | 5.30E-24 | 1 |
| AT4G31800.2 | 175 | 232 | 175 | 233 | WRKY | 1  | 59 | 59 | 84.2 | 5.30E-24 | 1 |
| AT4G39410.1 | 223 | 279 | 223 | 280 | WRKY | 1  | 59 | 59 | 87.8 | 4.10E-25 | 1 |
| AT5G01900.1 | 111 | 170 | 110 | 170 | WRKY | 2  | 60 | 61 | 79.2 | 1.90E-22 | 1 |
| AT5G07100.1 | 117 | 174 | 117 | 174 | WRKY | 1  | 60 | 60 | 84.7 | 3.80E-24 | 2 |
|             | 234 | 291 | 234 | 291 | WRKY | 1  | 60 | 60 | 86.8 | 8.40E-25 |   |
| AT5G07100.2 | 24  | 81  | 24  | 81  | WRKY | 1  | 60 | 60 | 85.5 | 2.00E-24 | 2 |
|             | 141 | 198 | 141 | 198 | WRKY | 1  | 60 | 60 | 87.6 | 4.50E-25 |   |
| AT5G13080.1 | 67  | 124 | 67  | 124 | WRKY | 1  | 60 | 60 | 91.4 | 3.00E-26 | 1 |
| AT5G15130.1 | 227 | 284 | 227 | 285 | WRKY | 1  | 59 | 59 | 93.1 | 9.10E-27 | 1 |
| AT5G22570.1 | 111 | 170 | 110 | 170 | WRKY | 2  | 60 | 61 | 74   | 8.00E-21 | 1 |
| AT5G24110.1 | 113 | 172 | 113 | 173 | WRKY | 1  | 59 | 61 | 87.4 | 5.30E-25 | 1 |
| AT5G26170.1 | 113 | 169 | 113 | 170 | WRKY | 1  | 59 | 59 | 90.4 | 6.10E-26 | 1 |
| AT5G28650.1 | 263 | 319 | 262 | 320 | WRKY | 2  | 59 | 58 | 91.5 | 2.80E-26 | 1 |
| AT5G41570.1 | 98  | 155 | 98  | 155 | WRKY | 1  | 60 | 60 | 89.5 | 1.20E-25 | 1 |

|             |      |      |      |      |      |   |    |    |      |          |   |
|-------------|------|------|------|------|------|---|----|----|------|----------|---|
| AT5G43290.1 | 114  | 170  | 114  | 171  | WRKY | 1 | 59 | 59 | 84.6 | 3.90E-24 | 1 |
| AT5G45050.1 | 1181 | 1238 | 1180 | 1238 | WRKY | 2 | 60 | 59 | 81.2 | 4.50E-23 | 1 |
| AT5G45050.2 | 1153 | 1210 | 1152 | 1210 | WRKY | 2 | 60 | 59 | 81.3 | 4.40E-23 | 1 |
| AT5G45260.1 | 1209 | 1268 | 1208 | 1268 | WRKY | 2 | 60 | 61 | 80.9 | 5.80E-23 | 1 |
| AT5G46350.1 | 183  | 240  | 183  | 240  | WRKY | 1 | 60 | 60 | 88.7 | 2.10E-25 | 1 |
| AT5G49520.1 | 221  | 278  | 221  | 278  | WRKY | 1 | 60 | 60 | 94.8 | 2.70E-27 | 1 |
| AT5G52830.1 | 166  | 223  | 165  | 223  | WRKY | 2 | 60 | 59 | 90.8 | 4.50E-26 | 1 |
| AT5G56270.1 | 273  | 328  | 273  | 329  | WRKY | 1 | 59 | 59 | 84.3 | 5.10E-24 | 2 |
|             | 487  | 544  | 487  | 544  | WRKY | 1 | 60 | 60 | 86.7 | 8.90E-25 |   |
| AT5G64810.1 | 110  | 167  | 110  | 167  | WRKY | 1 | 60 | 60 | 78.7 | 2.80E-22 | 1 |

| <b>Basal</b>          | <i>Amborella trichopoda</i> (33WRKYs) |     |     |     |     |      |    |    |    |      |          |   |
|-----------------------|---------------------------------------|-----|-----|-----|-----|------|----|----|----|------|----------|---|
| <b>Magnoliophytas</b> | ERM93535                              | 8   | 65  | 8   | 65  | WRKY | 1  | 60 | 60 | 78.6 | 3.00E-22 | 1 |
|                       | ERM95579                              | 249 | 305 | 249 | 305 | WRKY | 1  | 60 | 60 | 89.4 | 1.20E-25 | 2 |
|                       |                                       | 419 | 476 | 419 | 476 | WRKY | 1  | 60 | 60 | 89   | 1.70E-25 |   |
|                       | ERM95680                              | 193 | 247 | 192 | 248 | WRKY | 2  | 59 | 58 | 86.9 | 7.70E-25 | 2 |
|                       |                                       | 388 | 445 | 388 | 445 | WRKY | 1  | 60 | 60 | 88.7 | 2.10E-25 |   |
|                       | ERM97637                              | 89  | 146 | 88  | 146 | WRKY | 2  | 60 | 59 | 90.2 | 6.90E-26 | 1 |
|                       | ERM99620                              | 259 | 315 | 259 | 315 | WRKY | 1  | 60 | 60 | 80.5 | 7.80E-23 | 2 |
|                       |                                       | 437 | 494 | 437 | 494 | WRKY | 1  | 60 | 60 | 91.9 | 2.10E-26 |   |
|                       | ERM99929                              | 139 | 196 | 139 | 196 | WRKY | 1  | 60 | 60 | 89.9 | 9.10E-26 | 1 |
|                       | ERN00365                              | 2   | 38  | 1   | 40  | WRKY | 21 | 58 | 38 | 41.7 | 1.00E-10 | 1 |
|                       | ERN00368                              | 235 | 290 | 234 | 292 | WRKY | 2  | 58 | 57 | 65.9 | 2.80E-18 | 1 |
|                       | ERN01414                              | 239 | 295 | 238 | 296 | WRKY | 2  | 59 | 58 | 95.8 | 1.30E-27 | 1 |
|                       | ERN01868                              | 199 | 255 | 199 | 255 | WRKY | 1  | 60 | 60 | 89.3 | 1.30E-25 | 2 |
|                       |                                       | 415 | 472 | 415 | 472 | WRKY | 1  | 60 | 60 | 87.2 | 6.00E-25 |   |
|                       | ERN02047                              | 283 | 340 | 282 | 340 | WRKY | 2  | 60 | 59 | 91.2 | 3.60E-26 | 1 |
|                       | ERN02112                              | 122 | 179 | 121 | 179 | WRKY | 2  | 60 | 59 | 87.6 | 4.50E-25 | 1 |
|                       | ERN03304                              | 137 | 194 | 137 | 194 | WRKY | 1  | 60 | 60 | 91.3 | 3.30E-26 | 1 |
|                       | ERN03816                              | 252 | 310 | 252 | 310 | WRKY | 1  | 60 | 60 | 92.2 | 1.70E-26 | 1 |
|                       | ERN03839                              | 109 | 165 | 109 | 166 | WRKY | 1  | 59 | 59 | 84.5 | 4.30E-24 | 1 |
|                       | ERN03881                              | 140 | 196 | 140 | 197 | WRKY | 1  | 59 | 59 | 88.2 | 3.10E-25 | 1 |
|                       | ERN04180                              | 141 | 201 | 141 | 201 | WRKY | 1  | 60 | 62 | 86.1 | 1.40E-24 | 1 |
|                       | ERN04181                              | 6   | 65  | 6   | 65  | WRKY | 1  | 60 | 61 | 85.8 | 1.70E-24 | 1 |
|                       | ERN05012                              | 153 | 210 | 152 | 210 | WRKY | 2  | 60 | 59 | 89.2 | 1.50E-25 | 1 |
|                       | ERN05172                              | 7   | 46  | 4   | 46  | WRKY | 19 | 60 | 42 | 52.4 | 4.50E-14 | 1 |
|                       | ERN05173                              | 121 | 142 | 121 | 145 | WRKY | 1  | 22 | 22 | 34   | 2.50E-08 | 1 |
|                       | ERN06521                              | 226 | 281 | 226 | 282 | WRKY | 1  | 59 | 59 | 86.5 | 1.00E-24 | 2 |
|                       |                                       | 409 | 466 | 409 | 466 | WRKY | 1  | 60 | 60 | 88.5 | 2.50E-25 |   |
|                       | ERN07431                              | 244 | 300 | 243 | 301 | WRKY | 2  | 59 | 58 | 94.2 | 3.90E-27 | 1 |
|                       | ERN07935                              | 111 | 167 | 111 | 168 | WRKY | 1  | 59 | 59 | 88.1 | 3.20E-25 | 1 |
|                       | ERN08293                              | 232 | 290 | 232 | 290 | WRKY | 1  | 60 | 60 | 94.6 | 3.10E-27 | 1 |
|                       | ERN08862                              | 266 | 323 | 265 | 323 | WRKY | 2  | 60 | 59 | 94.2 | 4.10E-27 | 1 |
|                       | ERN08905                              | 120 | 178 | 119 | 179 | WRKY | 2  | 59 | 60 | 89.9 | 8.80E-26 | 1 |
|                       | ERN08906                              | 120 | 178 | 119 | 179 | WRKY | 2  | 59 | 60 | 91   | 3.90E-26 | 1 |
|                       | ERN09907                              | 74  | 93  | 74  | 95  | WRKY | 1  | 20 | 20 | 29.2 | 8.10E-07 | 1 |
|                       | ERN14755                              | 208 | 265 | 207 | 265 | WRKY | 2  | 60 | 59 | 90.4 | 6.40E-26 | 1 |
|                       | ERN18679                              | 147 | 205 | 147 | 205 | WRKY | 1  | 60 | 60 | 84   | 6.30E-24 | 1 |
|                       | ERN18680                              | 113 | 170 | 112 | 170 | WRKY | 2  | 60 | 59 | 83.7 | 7.60E-24 | 1 |
|                       | ERN19019                              | 321 | 377 | 321 | 377 | WRKY | 1  | 60 | 60 | 88.9 | 1.90E-25 | 2 |

|                            | 536                                             | 593 | 536 | 593 | WRKY | 1  | 60 | 60 | 88   | 3.50E-25 |   |  |
|----------------------------|-------------------------------------------------|-----|-----|-----|------|----|----|----|------|----------|---|--|
| <b>Gymnosperms</b>         | <b><i>Picea sitchensis</i> (8 WRKYs)</b>        |     |     |     |      |    |    |    |      |          |   |  |
| gi 116791126 gb ABK25866.1 | 248                                             | 305 | 248 | 305 | WRKY | 1  | 60 | 60 | 89.8 | 9.70E-26 | 1 |  |
| gi 148905936 gb ABR16129.1 | 265                                             | 321 | 264 | 322 | WRKY | 2  | 59 | 58 | 93.2 | 8.10E-27 | 1 |  |
| gi 148906002 gb ABR16161.1 | 481                                             | 538 | 481 | 538 | WRKY | 1  | 60 | 60 | 89.2 | 1.50E-25 | 2 |  |
|                            | 284                                             | 338 | 283 | 339 | WRKY | 2  | 59 | 58 | 90.2 | 7.30E-26 |   |  |
| gi 294461775 gb ADE76446.1 | 14                                              | 52  | 4   | 52  | WRKY | 20 | 60 | 42 | 42.2 | 6.70E-11 | 1 |  |
| gi 294463034 gb ADE77055.1 | 152                                             | 209 | 152 | 209 | WRKY | 1  | 60 | 60 | 93.3 | 7.60E-27 | 1 |  |
| gi 294463948 gb ADE77495.1 | 274                                             | 330 | 273 | 331 | WRKY | 2  | 59 | 58 | 91.9 | 2.10E-26 | 1 |  |
| gi 294464132 gb ADE77584.1 | 294                                             | 350 | 293 | 351 | WRKY | 2  | 59 | 58 | 93.3 | 7.70E-27 | 1 |  |
| gi 294464637 gb ADE77827.1 | 209                                             | 265 | 209 | 266 | WRKY | 1  | 59 | 59 | 89.4 | 1.20E-25 | 1 |  |
| <b>Bryophytes</b>          | <b><i>Physcomitrella patens</i> (117 WRKYs)</b> |     |     |     |      |    |    |    |      |          |   |  |
| Pp3c1_40230V3.1.p          | 326                                             | 383 | 325 | 383 | WRKY | 2  | 60 | 59 | 94.7 | 2.70E-27 | 1 |  |
| Pp3c1_40230V3.2.p          | 326                                             | 383 | 325 | 383 | WRKY | 2  | 60 | 59 | 94.7 | 2.70E-27 | 1 |  |
| Pp3c1_40230V3.3.p          | 326                                             | 383 | 325 | 383 | WRKY | 2  | 60 | 59 | 94.7 | 2.70E-27 | 1 |  |
| Pp3c11_14240V3.1.p         | 147                                             | 204 | 146 | 204 | WRKY | 2  | 60 | 59 | 91.3 | 3.30E-26 | 1 |  |
| Pp3c11_14240V3.2.p         | 147                                             | 204 | 146 | 204 | WRKY | 2  | 60 | 59 | 91.3 | 3.30E-26 | 1 |  |
| Pp3c11_1790V3.1.p          | 254                                             | 311 | 254 | 311 | WRKY | 1  | 60 | 60 | 83.3 | 1.00E-23 | 1 |  |
| Pp3c11_1790V3.2.p          | 254                                             | 311 | 254 | 311 | WRKY | 1  | 60 | 60 | 83.3 | 1.00E-23 | 1 |  |
| Pp3c11_1840V3.1.p          | 224                                             | 281 | 224 | 281 | WRKY | 1  | 60 | 60 | 88   | 3.50E-25 | 1 |  |
| Pp3c11_1840V3.2.p          | 224                                             | 281 | 224 | 281 | WRKY | 1  | 60 | 60 | 88   | 3.50E-25 | 1 |  |
| Pp3c11_1840V3.3.p          | 225                                             | 282 | 225 | 282 | WRKY | 1  | 60 | 60 | 88   | 3.60E-25 | 1 |  |
| Pp3c11_21340V3.2.p         | 176                                             | 196 | 175 | 207 | WRKY | 2  | 22 | 21 | 22   | 0.00014  | 1 |  |
| Pp3c12_4260V3.1.p          | 372                                             | 430 | 372 | 430 | WRKY | 1  | 60 | 60 | 89.5 | 1.20E-25 | 1 |  |
| Pp3c12_4260V3.2.p          | 372                                             | 430 | 372 | 430 | WRKY | 1  | 60 | 60 | 89.5 | 1.20E-25 | 1 |  |
| Pp3c13_10830V3.1.p         | 347                                             | 403 | 347 | 404 | WRKY | 1  | 59 | 59 | 88.6 | 2.30E-25 | 1 |  |
| Pp3c13_10830V3.2.p         | 347                                             | 403 | 347 | 404 | WRKY | 1  | 59 | 59 | 88.6 | 2.30E-25 | 1 |  |
| Pp3c13_15520V3.1.p         | 376                                             | 434 | 376 | 434 | WRKY | 1  | 60 | 60 | 94.5 | 3.30E-27 | 1 |  |
| Pp3c13_15520V3.2.p         | 376                                             | 434 | 376 | 434 | WRKY | 1  | 60 | 60 | 94.5 | 3.30E-27 | 1 |  |
| Pp3c13_15520V3.3.p         | 376                                             | 434 | 376 | 434 | WRKY | 1  | 60 | 60 | 94.5 | 3.30E-27 | 1 |  |
| Pp3c14_11320V3.1.p         | 196                                             | 252 | 195 | 253 | WRKY | 1  | 59 | 59 | 68.3 | 5.10E-19 | 1 |  |
| Pp3c14_11320V3.2.p         | 127                                             | 183 | 126 | 184 | WRKY | 1  | 59 | 59 | 68.6 | 3.90E-19 | 1 |  |
| Pp3c14_11320V3.3.p         | 196                                             | 252 | 195 | 253 | WRKY | 1  | 59 | 59 | 68.3 | 5.10E-19 | 1 |  |
| Pp3c14_17020V3.1.p         | 324                                             | 381 | 323 | 381 | WRKY | 2  | 60 | 59 | 93.6 | 6.00E-27 | 1 |  |
| Pp3c14_17020V3.2.p         | 324                                             | 381 | 323 | 381 | WRKY | 2  | 60 | 59 | 93.6 | 6.00E-27 | 1 |  |
| Pp3c17_19970V3.1.p         | 327                                             | 383 | 326 | 384 | WRKY | 2  | 59 | 58 | 92.6 | 1.30E-26 | 1 |  |
| Pp3c17_19970V3.2.p         | 327                                             | 383 | 326 | 384 | WRKY | 2  | 59 | 58 | 92.6 | 1.30E-26 | 1 |  |
| Pp3c19_3000V3.1.p          | 333                                             | 390 | 333 | 390 | WRKY | 1  | 60 | 60 | 88.3 | 2.70E-25 | 1 |  |
| Pp3c19_3000V3.2.p          | 333                                             | 390 | 333 | 390 | WRKY | 1  | 60 | 60 | 88.3 | 2.70E-25 | 1 |  |
| Pp3c2_23590V3.1.p          | 372                                             | 428 | 372 | 428 | WRKY | 1  | 60 | 60 | 84.8 | 3.40E-24 | 2 |  |
|                            | 551                                             | 608 | 551 | 608 | WRKY | 1  | 60 | 60 | 92.1 | 1.90E-26 |   |  |
| Pp3c2_23590V3.2.p          | 372                                             | 428 | 372 | 428 | WRKY | 1  | 60 | 60 | 84.8 | 3.40E-24 | 2 |  |
|                            | 551                                             | 608 | 551 | 608 | WRKY | 1  | 60 | 60 | 92.1 | 1.90E-26 |   |  |
| Pp3c2_23590V3.3.p          | 372                                             | 428 | 372 | 428 | WRKY | 1  | 60 | 60 | 84.8 | 3.40E-24 | 2 |  |
|                            | 554                                             | 611 | 554 | 611 | WRKY | 1  | 60 | 60 | 92.1 | 1.90E-26 |   |  |
| Pp3c2_23590V3.4.p          | 372                                             | 428 | 372 | 428 | WRKY | 1  | 60 | 60 | 84.8 | 3.40E-24 | 2 |  |
|                            | 554                                             | 611 | 554 | 611 | WRKY | 1  | 60 | 60 | 92.1 | 1.90E-26 |   |  |
| Pp3c2_23590V3.5.p          | 372                                             | 428 | 372 | 428 | WRKY | 1  | 60 | 60 | 84.5 | 4.30E-24 | 2 |  |
|                            | 554                                             | 611 | 554 | 611 | WRKY | 1  | 60 | 60 | 91.7 | 2.40E-26 |   |  |

|                    |     |     |     |     |      |   |    |    |      |          |   |
|--------------------|-----|-----|-----|-----|------|---|----|----|------|----------|---|
| Pp3c2_23590V3.6.p  | 372 | 428 | 372 | 428 | WRKY | 1 | 60 | 60 | 84   | 6.00E-24 | 2 |
|                    | 554 | 611 | 554 | 611 | WRKY | 1 | 60 | 60 | 91.3 | 3.40E-26 |   |
| Pp3c2_2510V3.1.p   | 324 | 381 | 323 | 381 | WRKY | 2 | 60 | 59 | 94.7 | 2.70E-27 | 1 |
| Pp3c2_2510V3.2.p   | 324 | 381 | 323 | 381 | WRKY | 2 | 60 | 59 | 94.7 | 2.70E-27 | 1 |
| Pp3c2_2510V3.3.p   | 324 | 381 | 323 | 381 | WRKY | 2 | 60 | 59 | 94.7 | 2.70E-27 | 1 |
| Pp3c2_2510V3.4.p   | 324 | 381 | 323 | 381 | WRKY | 2 | 60 | 59 | 94.7 | 2.70E-27 | 1 |
| Pp3c2_2510V3.5.p   | 324 | 381 | 323 | 381 | WRKY | 2 | 60 | 59 | 94.7 | 2.70E-27 | 1 |
| Pp3c2_2510V3.6.p   | 324 | 381 | 323 | 381 | WRKY | 2 | 60 | 59 | 94.7 | 2.70E-27 | 1 |
| Pp3c2_2510V3.7.p   | 324 | 381 | 323 | 381 | WRKY | 2 | 60 | 59 | 94.7 | 2.70E-27 | 1 |
| Pp3c2_32150V3.1.p  | 177 | 234 | 177 | 234 | WRKY | 1 | 60 | 60 | 79.4 | 1.70E-22 | 1 |
| Pp3c2_32150V3.2.p  | 166 | 223 | 166 | 223 | WRKY | 1 | 60 | 60 | 79.5 | 1.60E-22 | 1 |
| Pp3c2_32160V3.1.p  | 192 | 249 | 192 | 249 | WRKY | 1 | 60 | 60 | 85.3 | 2.40E-24 | 1 |
| Pp3c2_32160V3.10.p | 322 | 379 | 322 | 379 | WRKY | 1 | 60 | 60 | 84.8 | 3.40E-24 | 1 |
| Pp3c2_32160V3.2.p  | 68  | 125 | 68  | 125 | WRKY | 1 | 60 | 60 | 86   | 1.50E-24 | 1 |
| Pp3c2_32160V3.3.p  | 68  | 125 | 68  | 125 | WRKY | 1 | 60 | 60 | 86   | 1.50E-24 | 1 |
| Pp3c2_32160V3.4.p  | 68  | 125 | 68  | 125 | WRKY | 1 | 60 | 60 | 86   | 1.50E-24 | 1 |
| Pp3c2_32160V3.5.p  | 209 | 266 | 209 | 266 | WRKY | 1 | 60 | 60 | 85.2 | 2.50E-24 | 1 |
| Pp3c2_32160V3.6.p  | 289 | 346 | 289 | 346 | WRKY | 1 | 60 | 60 | 84.9 | 3.10E-24 | 1 |
| Pp3c2_32160V3.7.p  | 272 | 329 | 272 | 329 | WRKY | 1 | 60 | 60 | 85   | 3.00E-24 | 1 |
| Pp3c2_32160V3.8.p  | 322 | 379 | 322 | 379 | WRKY | 1 | 60 | 60 | 84.8 | 3.40E-24 | 1 |
| Pp3c2_32160V3.9.p  | 305 | 362 | 305 | 362 | WRKY | 1 | 60 | 60 | 84.9 | 3.20E-24 | 1 |
| Pp3c2_9700V3.1.p   | 287 | 344 | 287 | 345 | WRKY | 1 | 59 | 60 | 70.5 | 1.00E-19 | 1 |
| Pp3c2_9700V3.2.p   | 287 | 344 | 287 | 345 | WRKY | 1 | 59 | 60 | 70.5 | 1.00E-19 | 1 |
| Pp3c2_9700V3.3.p   | 287 | 344 | 287 | 345 | WRKY | 1 | 59 | 60 | 70.5 | 1.00E-19 | 1 |
| Pp3c2_9700V3.4.p   | 287 | 344 | 287 | 345 | WRKY | 1 | 59 | 60 | 70.5 | 1.00E-19 | 1 |
| Pp3c2_9700V3.5.p   | 287 | 344 | 287 | 345 | WRKY | 1 | 59 | 60 | 70.5 | 1.00E-19 | 1 |
| Pp3c2_9700V3.6.p   | 287 | 344 | 287 | 345 | WRKY | 1 | 59 | 60 | 70.5 | 1.00E-19 | 1 |
| Pp3c20_12200V3.1.p | 340 | 396 | 340 | 397 | WRKY | 1 | 59 | 59 | 89.8 | 9.80E-26 | 1 |
| Pp3c20_12200V3.2.p | 340 | 396 | 340 | 397 | WRKY | 1 | 59 | 59 | 89.8 | 9.80E-26 | 1 |
| Pp3c20_12200V3.3.p | 340 | 396 | 340 | 397 | WRKY | 1 | 59 | 59 | 89.8 | 9.80E-26 | 1 |
| Pp3c21_11270V3.1.p | 325 | 382 | 325 | 382 | WRKY | 1 | 60 | 60 | 86.1 | 1.40E-24 | 1 |
| Pp3c21_11270V3.2.p | 325 | 382 | 325 | 382 | WRKY | 1 | 60 | 60 | 86.1 | 1.40E-24 | 1 |
| Pp3c22_12880V3.1.p | 313 | 370 | 313 | 370 | WRKY | 1 | 60 | 60 | 84.6 | 4.00E-24 | 1 |
| Pp3c23_10680V3.1.p | 333 | 389 | 333 | 390 | WRKY | 1 | 59 | 59 | 89.7 | 1.00E-25 | 1 |
| Pp3c23_10680V3.2.p | 333 | 389 | 333 | 390 | WRKY | 1 | 59 | 59 | 89.7 | 1.00E-25 | 1 |
| Pp3c24_7120V3.1.p  | 333 | 389 | 333 | 390 | WRKY | 1 | 59 | 59 | 90.4 | 6.10E-26 | 1 |
| Pp3c24_7120V3.2.p  | 333 | 389 | 333 | 390 | WRKY | 1 | 59 | 59 | 90.4 | 6.10E-26 | 1 |
| Pp3c26_5090V3.1.p  | 388 | 445 | 388 | 445 | WRKY | 1 | 60 | 60 | 88.4 | 2.50E-25 | 1 |
| Pp3c26_5095V3.1.p  | 388 | 445 | 388 | 445 | WRKY | 1 | 60 | 60 | 88.4 | 2.50E-25 | 1 |
| Pp3c27_600V3.1.p   | 149 | 206 | 149 | 207 | WRKY | 1 | 59 | 60 | 69.9 | 1.50E-19 | 1 |
| Pp3c27_600V3.2.p   | 149 | 206 | 149 | 207 | WRKY | 1 | 59 | 60 | 69.9 | 1.50E-19 | 1 |
| Pp3c27_600V3.3.p   | 243 | 300 | 243 | 301 | WRKY | 1 | 59 | 60 | 69.5 | 2.10E-19 | 1 |
| Pp3c27_600V3.4.p   | 271 | 328 | 271 | 329 | WRKY | 1 | 59 | 60 | 69.3 | 2.30E-19 | 1 |
| Pp3c27_600V3.5.p   | 271 | 328 | 271 | 329 | WRKY | 1 | 59 | 60 | 69.3 | 2.30E-19 | 1 |
| Pp3c3_15040V3.1.p  | 251 | 308 | 251 | 308 | WRKY | 1 | 60 | 60 | 86.2 | 1.30E-24 | 1 |
| Pp3c3_15040V3.2.p  | 251 | 308 | 251 | 308 | WRKY | 1 | 60 | 60 | 86.2 | 1.30E-24 | 1 |
| Pp3c3_15040V3.3.p  | 251 | 308 | 251 | 308 | WRKY | 1 | 60 | 60 | 86.2 | 1.30E-24 | 1 |
| Pp3c3_15040V3.4.p  | 311 | 368 | 311 | 368 | WRKY | 1 | 60 | 60 | 86   | 1.50E-24 | 1 |
| Pp3c3_15040V3.5.p  | 311 | 368 | 311 | 368 | WRKY | 1 | 60 | 60 | 86   | 1.50E-24 | 1 |

|                   |     |     |     |     |      |    |    |    |      |          |   |
|-------------------|-----|-----|-----|-----|------|----|----|----|------|----------|---|
| Pp3c3_15040V3.6.p | 311 | 368 | 311 | 368 | WRKY | 1  | 60 | 60 | 86   | 1.50E-24 | 1 |
| Pp3c3_15040V3.7.p | 357 | 414 | 357 | 414 | WRKY | 1  | 60 | 60 | 85.9 | 1.60E-24 | 1 |
| Pp3c3_21440V3.1.p | 369 | 427 | 369 | 427 | WRKY | 1  | 60 | 60 | 93.3 | 7.80E-27 | 1 |
| Pp3c3_21440V3.2.p | 369 | 427 | 369 | 427 | WRKY | 1  | 60 | 60 | 93.3 | 7.80E-27 | 1 |
| Pp3c3_27940V3.1.p | 329 | 385 | 329 | 385 | WRKY | 1  | 60 | 60 | 89.3 | 1.40E-25 | 2 |
|                   | 492 | 549 | 492 | 549 | WRKY | 1  | 60 | 60 | 88.6 | 2.20E-25 |   |
| Pp3c3_27940V3.2.p | 329 | 385 | 329 | 385 | WRKY | 1  | 60 | 60 | 89.3 | 1.40E-25 | 2 |
|                   | 492 | 549 | 492 | 549 | WRKY | 1  | 60 | 60 | 88.6 | 2.20E-25 |   |
| Pp3c3_27940V3.3.p | 329 | 385 | 329 | 385 | WRKY | 1  | 60 | 60 | 89.3 | 1.40E-25 | 2 |
|                   | 492 | 549 | 492 | 549 | WRKY | 1  | 60 | 60 | 88.6 | 2.20E-25 |   |
| Pp3c3_27940V3.4.p | 329 | 385 | 329 | 385 | WRKY | 1  | 60 | 60 | 89.3 | 1.40E-25 | 2 |
|                   | 492 | 549 | 492 | 549 | WRKY | 1  | 60 | 60 | 88.6 | 2.20E-25 |   |
| Pp3c3_32860V3.1.p | 365 | 422 | 365 | 422 | WRKY | 1  | 60 | 60 | 85.5 | 2.10E-24 | 1 |
| Pp3c3_32860V3.2.p | 365 | 422 | 365 | 422 | WRKY | 1  | 60 | 60 | 85.5 | 2.10E-24 | 1 |
| Pp3c3_32860V3.3.p | 365 | 422 | 365 | 422 | WRKY | 1  | 60 | 60 | 85.5 | 2.10E-24 | 1 |
| Pp3c3_32860V3.4.p | 365 | 422 | 365 | 422 | WRKY | 1  | 60 | 60 | 85.5 | 2.10E-24 | 1 |
| Pp3c3_32860V3.5.p | 365 | 422 | 365 | 422 | WRKY | 1  | 60 | 60 | 85.5 | 2.10E-24 | 1 |
| Pp3c3_32860V3.6.p | 365 | 422 | 365 | 422 | WRKY | 1  | 60 | 60 | 85.5 | 2.10E-24 | 1 |
| Pp3c3_8830V3.1.p  | 353 | 409 | 353 | 410 | WRKY | 1  | 59 | 59 | 85.6 | 2.00E-24 | 1 |
| Pp3c3_8830V3.2.p  | 353 | 409 | 353 | 410 | WRKY | 1  | 59 | 59 | 85.6 | 2.00E-24 | 1 |
| Pp3c4_15559V3.1.p | 367 | 424 | 367 | 425 | WRKY | 1  | 59 | 59 | 89.8 | 9.30E-26 | 1 |
| Pp3c4_26880V3.1.p | 334 | 390 | 334 | 391 | WRKY | 1  | 59 | 59 | 88.4 | 2.50E-25 | 1 |
| Pp3c4_26880V3.2.p | 334 | 390 | 334 | 391 | WRKY | 1  | 59 | 59 | 88.4 | 2.50E-25 | 1 |
| Pp3c4_26880V3.3.p | 334 | 390 | 334 | 391 | WRKY | 1  | 59 | 59 | 88.3 | 2.70E-25 | 1 |
| Pp3c4_26880V3.4.p | 437 | 493 | 437 | 494 | WRKY | 1  | 59 | 59 | 88   | 3.40E-25 | 1 |
| Pp3c5_12130V3.1.p | 349 | 406 | 349 | 407 | WRKY | 1  | 59 | 60 | 70   | 1.50E-19 | 1 |
| Pp3c5_12130V3.2.p | 148 | 205 | 148 | 206 | WRKY | 1  | 59 | 60 | 70.9 | 7.70E-20 | 1 |
| Pp3c6_14470V3.1.p | 343 | 400 | 343 | 401 | WRKY | 1  | 59 | 60 | 67.9 | 6.50E-19 | 1 |
| Pp3c6_14470V3.2.p | 144 | 201 | 144 | 202 | WRKY | 1  | 59 | 60 | 69   | 3.00E-19 | 1 |
| Pp3c6_14470V3.3.p | 144 | 201 | 144 | 202 | WRKY | 1  | 59 | 60 | 68.9 | 3.10E-19 | 1 |
| Pp3c7_18860V3.1.p | 167 | 246 | 167 | 246 | WRKY | 1  | 60 | 85 | 48.6 | 6.80E-13 | 1 |
| Pp3c7_24490V3.1.p | 216 | 273 | 216 | 273 | WRKY | 1  | 60 | 60 | 87.2 | 6.10E-25 | 1 |
| Pp3c7_24490V3.2.p | 216 | 273 | 216 | 273 | WRKY | 1  | 60 | 60 | 87.2 | 6.10E-25 | 1 |
| Pp3c7_7550V3.1.p  | 316 | 372 | 315 | 373 | WRKY | 2  | 59 | 58 | 91.6 | 2.60E-26 | 1 |
| Pp3c7_7550V3.2.p  | 290 | 330 | 280 | 331 | WRKY | 18 | 59 | 42 | 47.3 | 1.70E-12 | 1 |
| Pp3c7_7550V3.3.p  | 316 | 372 | 315 | 373 | WRKY | 2  | 59 | 58 | 91.6 | 2.60E-26 | 1 |
| Pp3c8_4400V3.1.p  | 351 | 407 | 351 | 407 | WRKY | 1  | 60 | 60 | 89.6 | 1.10E-25 | 2 |
|                   | 514 | 571 | 514 | 571 | WRKY | 1  | 60 | 60 | 88.6 | 2.30E-25 |   |
| Pp3c8_4400V3.2.p  | 351 | 407 | 351 | 407 | WRKY | 1  | 60 | 60 | 89.6 | 1.10E-25 | 2 |
|                   | 514 | 571 | 514 | 571 | WRKY | 1  | 60 | 60 | 88.6 | 2.30E-25 |   |
| Pp3c8_4400V3.3.p  | 351 | 407 | 351 | 407 | WRKY | 1  | 60 | 60 | 89.6 | 1.10E-25 | 2 |
|                   | 514 | 571 | 514 | 571 | WRKY | 1  | 60 | 60 | 88.6 | 2.30E-25 |   |
| Pp3c8_5110V3.1.p  | 372 | 429 | 372 | 429 | WRKY | 1  | 60 | 60 | 85.8 | 1.70E-24 | 1 |
| Pp3c8_5110V3.2.p  | 454 | 511 | 454 | 511 | WRKY | 1  | 60 | 60 | 85.6 | 2.00E-24 | 1 |

**Lycophytes**

***Selaginella moellendorffii* (35 WRKYs)**

|          |     |     |     |     |      |   |    |    |      |          |   |
|----------|-----|-----|-----|-----|------|---|----|----|------|----------|---|
| EFJ04574 | 31  | 87  | 31  | 87  | WRKY | 1 | 59 | 59 | 95.5 | 1.60E-27 | 1 |
| EFJ07462 | 109 | 165 | 109 | 165 | WRKY | 1 | 60 | 60 | 92.9 | 1.00E-26 | 2 |
|          | 225 | 282 | 225 | 282 | WRKY | 1 | 60 | 60 | 92.5 | 1.40E-26 |   |
| EFJ08874 | 1   | 55  | 1   | 56  | WRKY | 2 | 59 | 58 | 81.5 | 3.60E-23 | 2 |

|          |     |     |     |     |      |   |    |    |       |          |   |
|----------|-----|-----|-----|-----|------|---|----|----|-------|----------|---|
|          | 117 | 173 | 117 | 174 | WRKY | 1 | 59 | 59 | 93.2  | 8.10E-27 |   |
| EFJ09535 | 25  | 82  | 24  | 82  | WRKY | 2 | 60 | 59 | 95.4  | 1.70E-27 | 1 |
| EFJ10059 | 25  | 81  | 25  | 81  | WRKY | 1 | 59 | 59 | 92.2  | 1.70E-26 | 1 |
| EFJ10090 | 2   | 60  | 2   | 60  | WRKY | 1 | 60 | 60 | 101.9 | 1.60E-29 | 1 |
| EFJ11950 | 1   | 55  | 1   | 56  | WRKY | 2 | 59 | 58 | 81.3  | 4.40E-23 | 2 |
|          | 117 | 173 | 117 | 174 | WRKY | 1 | 59 | 59 | 92.9  | 9.90E-27 |   |
| EFJ14690 | 34  | 90  | 34  | 90  | WRKY | 1 | 59 | 59 | 93.6  | 6.30E-27 | 1 |
| EFJ17667 | 2   | 60  | 2   | 60  | WRKY | 1 | 60 | 60 | 98.7  | 1.50E-28 | 1 |
| EFJ18006 | 4   | 64  | 4   | 64  | WRKY | 1 | 60 | 62 | 96.2  | 9.40E-28 | 1 |
| EFJ20023 | 109 | 165 | 109 | 165 | WRKY | 1 | 60 | 60 | 92.9  | 1.00E-26 | 2 |
|          | 225 | 282 | 225 | 282 | WRKY | 1 | 60 | 60 | 92.5  | 1.40E-26 |   |
| EFJ20390 | 229 | 286 | 229 | 287 | WRKY | 1 | 59 | 59 | 92.8  | 1.10E-26 | 1 |
| EFJ20410 | 25  | 59  | 24  | 59  | WRKY | 2 | 36 | 35 | 60.1  | 1.80E-16 | 1 |
| EFJ20540 | 6   | 47  | 3   | 55  | WRKY | 4 | 46 | 43 | 46.3  | 3.60E-12 | 1 |
| EFJ21694 | 1   | 61  | 1   | 61  | WRKY | 1 | 60 | 62 | 92.3  | 1.50E-26 | 1 |
| EFJ23533 | 11  | 68  | 11  | 68  | WRKY | 1 | 60 | 60 | 94.3  | 3.80E-27 | 1 |
| EFJ25033 | 4   | 60  | 4   | 60  | WRKY | 1 | 60 | 60 | 97.3  | 4.40E-28 | 2 |
|          | 111 | 168 | 111 | 168 | WRKY | 1 | 60 | 60 | 94.6  | 2.90E-27 |   |
| EFJ26352 | 24  | 80  | 24  | 80  | WRKY | 1 | 59 | 59 | 94.1  | 4.40E-27 | 1 |
| EFJ28376 | 229 | 286 | 229 | 287 | WRKY | 1 | 59 | 59 | 92.8  | 1.10E-26 | 1 |
| EFJ28396 | 25  | 59  | 24  | 59  | WRKY | 2 | 36 | 35 | 60.1  | 1.80E-16 | 1 |
| EFJ28608 | 22  | 51  | 21  | 51  | WRKY | 7 | 36 | 30 | 45.8  | 5.30E-12 | 1 |
| EFJ29133 | 2   | 60  | 2   | 60  | WRKY | 1 | 60 | 60 | 98.7  | 1.50E-28 | 1 |
| EFJ30009 | 102 | 158 | 102 | 158 | WRKY | 1 | 60 | 60 | 96.1  | 1.00E-27 | 2 |
|          | 209 | 266 | 209 | 266 | WRKY | 1 | 60 | 60 | 93.5  | 6.80E-27 |   |
| EFJ31066 | 25  | 59  | 24  | 59  | WRKY | 2 | 36 | 35 | 60.1  | 1.80E-16 | 1 |
| EFJ31448 | 31  | 87  | 31  | 87  | WRKY | 1 | 59 | 59 | 95.5  | 1.60E-27 | 1 |
| EFJ33848 | 1   | 61  | 1   | 61  | WRKY | 1 | 60 | 62 | 94.1  | 4.30E-27 | 1 |
| EFJ33984 | 1   | 54  | 1   | 54  | WRKY | 6 | 60 | 55 | 86.6  | 9.70E-25 | 1 |
| EFJ34648 | 25  | 59  | 24  | 59  | WRKY | 2 | 36 | 35 | 60.1  | 1.80E-16 | 1 |
| EFJ34797 | 5   | 60  | 5   | 61  | WRKY | 1 | 59 | 59 | 88.1  | 3.20E-25 | 2 |
|          | 174 | 231 | 174 | 231 | WRKY | 1 | 60 | 60 | 89.9  | 8.60E-26 |   |
| EFJ34902 | 2   | 60  | 2   | 60  | WRKY | 1 | 60 | 60 | 101.9 | 1.60E-29 | 1 |
| EFJ34931 | 26  | 82  | 26  | 82  | WRKY | 1 | 59 | 59 | 92.1  | 1.80E-26 | 1 |
| EFJ36328 | 25  | 82  | 24  | 82  | WRKY | 2 | 60 | 59 | 95.4  | 1.70E-27 | 1 |
| EFJ37089 | 4   | 64  | 4   | 64  | WRKY | 1 | 60 | 62 | 96.2  | 9.40E-28 | 1 |
| EFJ37492 | 1   | 54  | 1   | 54  | WRKY | 6 | 60 | 55 | 86.6  | 9.70E-25 | 1 |
| EFJ38698 | 31  | 87  | 31  | 87  | WRKY | 1 | 59 | 59 | 95.5  | 1.60E-27 | 1 |

### Chlorophytes

#### *Ostreococcus lucimarinu* (2 WRKYs)

|          |    |     |    |     |      |   |    |    |      |          |   |
|----------|----|-----|----|-----|------|---|----|----|------|----------|---|
| ABO97433 | 27 | 88  | 27 | 89  | WRKY | 1 | 59 | 65 | 60.3 | 1.60E-16 | 1 |
| ABO98812 | 46 | 104 | 45 | 105 | WRKY | 2 | 59 | 60 | 85   | 3.00E-24 | 1 |

#### *Ostreococcus tauri* (6 WRKYs)

|                                 |     |     |     |     |      |   |    |    |      |          |   |
|---------------------------------|-----|-----|-----|-----|------|---|----|----|------|----------|---|
| gi 116059246 emb CAL54953.1     | 23  | 83  | 23  | 83  | WRKY | 1 | 60 | 64 | 72.8 | 1.90E-20 | 1 |
| gi 308806431 ref XP_003080527.1 | 82  | 139 | 82  | 140 | WRKY | 1 | 55 | 61 | 58.6 | 5.20E-16 | 1 |
| gi 308806948 ref XP_003080785.1 | 23  | 83  | 23  | 83  | WRKY | 1 | 60 | 64 | 72.8 | 1.90E-20 | 1 |
| gi 308809517 ref XP_003082068.1 | 31  | 94  | 31  | 94  | WRKY | 1 | 60 | 65 | 84.5 | 4.20E-24 | 1 |
| gi 693497948 emb CEF99688.1     | 31  | 94  | 31  | 94  | WRKY | 1 | 60 | 65 | 84.4 | 4.50E-24 | 1 |
| gi 693499331 emb CEF98869.1     | 141 | 198 | 141 | 199 | WRKY | 1 | 55 | 61 | 57.9 | 8.90E-16 | 1 |

#### *Micromonas pusilla* CCMP1545 (2 WRKYs)

|                                                       |      |      |      |      |      |   |    |    |      |          |   |
|-------------------------------------------------------|------|------|------|------|------|---|----|----|------|----------|---|
| 50253                                                 | 67   | 119  | 67   | 122  | WRKY | 1 | 55 | 55 | 76.2 | 1.70E-21 | 1 |
| 62997                                                 | 5    | 60   | 5    | 60   | WRKY | 1 | 60 | 60 | 85.4 | 2.20E-24 | 1 |
| <b><i>Volvox carteri</i> ( 4 WRKYs)</b>               |      |      |      |      |      |   |    |    |      |          |   |
| Vocar.0001s1791.1.p                                   | 122  | 178  | 121  | 178  | WRKY | 2 | 60 | 59 | 80.3 | 8.60E-23 | 2 |
|                                                       | 357  | 414  | 357  | 414  | WRKY | 1 | 60 | 60 | 91.1 | 3.80E-26 |   |
| Vocar.0001s1791.2.p                                   | 121  | 177  | 120  | 177  | WRKY | 2 | 60 | 59 | 80.3 | 8.60E-23 | 2 |
|                                                       | 356  | 413  | 356  | 413  | WRKY | 1 | 60 | 60 | 91.1 | 3.80E-26 |   |
| Vocar.0058s0025.1.p                                   | 1129 | 1165 | 1127 | 1204 | WRKY | 3 | 42 | 40 | 31.8 | 1.20E-07 | 1 |
| Vocar.0072s0004.1.p                                   | 1230 | 1264 | 1228 | 1269 | WRKY | 3 | 40 | 38 | 29.9 | 4.80E-07 | 1 |
| <b><i>Coccomyxa subellipsoidea C_169</i> (1 WRKY)</b> |      |      |      |      |      |   |    |    |      |          |   |
| 8449                                                  | 2    | 58   | 2    | 59   | WRKY | 1 | 59 | 59 | 74.6 | 5.40E-21 | 1 |
