# Supplementary material for: Genome-wide analysis of WRKY transcription factors in wheat (Triticum aestivum L.) and differential expression under water deficit condition
Source: PubMed Central journal article supplement (PMC5420200; doi:10.7717/peerj.3232), 2017-05-04
Supplement: peerj-05-3232-s008.pdf [file peerj-05-3232-s008.pdf]

**Supplemental Table S6. Drought responsive *AtWRKYs* in *Arabidopsis* and their putative orthologous *TaWRKYs* in wheat.**

| Arabidopsis   |          | Wheat                 |               |                            |
|---------------|----------|-----------------------|---------------|----------------------------|
| Transcript ID | Number   | Transcript ID         | Proposed name | Number of amino acids (aa) |
| AT2G38470.1   | AtWRKY33 | Traes_1AS_F3EAEC435.1 | TaWRKY1       | 440                        |
|               |          | Traes_1BS_EF67E5A24.1 | TaWRKY8       | 458                        |
|               |          | Traes_1DS_A6733B734.1 | TaWRKY120     | 464                        |
|               |          | Traes_3B_990298FF5.1  | TaWRKY133     | 559                        |
| AT1G69310.1   | AtWRKY57 | Traes_2AL_1B43EA59E.1 | TaWRKY20      | 228                        |
|               |          | Traes_2BL_A69F6C5DF.1 | TaWRKY31      | 285                        |
|               |          | Traes_5BL_C1D6B6B74.2 | TaWRKY90      | 310                        |
|               |          | Traes_5DL_7E2053226.2 | TaWRKY97      | 208                        |
|               |          | Traes_2DL_04535D371.1 | TaWRKY123     | 285                        |
|               |          | Traes_5AL_06A6F9328.2 | TaWRKY149     | 193                        |
| AT1G66600.1   | AtWRKY63 | Traes_7DL_A9EF00572.1 | TaWRKY112     | 226                        |
|               |          | Traes_2DL_362A1F535.1 | TaWRKY122     | 70                         |
|               |          | Traes_4AS_0DA136E0E.1 | TaWRKY142     | 135                        |
|               |          | Traes_7BL_53AA25AA1.1 | TaWRKY169     | 55                         |
